# Supplementary material for: Development of a Laser Microdissection-Coupled Quantitative Shotgun Lipidomic Method to Uncover Spatial Heterogeneity
Source: Cells. 2023 Jan 28;12(3):428. doi: 10.3390/cells12030428 (PMC9913738; doi:10.3390/cells12030428)
Supplement: Supplementary file 1 [file cells-12-00428-s001.zip › Zsiros_et_al_SupplTables_Proof.xlsx]

## Sheet: S1 MS_quant
Table S1. Mass spectrometry quantification details
Lipid Class	Internal standard (IS)	Ion format	Conc of infusion (fmol/μL)
PC, PC-O, LPC	PC(D31-16:0/18:1)	[M+Cl]−	506.479
PC, PC-O, LPC	PC(D31-16:0/18:1)	[M+H]+	506.479
PE, PE-P, LPE	PE(D31-16:0/18:1)	[M−H]−	178.32
PI, LPI	PI(D31-16:0/18:1)	[M−H]−	76.9175
PS, LPS	PS(D31-16:0/18:1)	[M−H]−	134.73
PG/BMP, LPG	PG(D31-16:0/18:1)	[M−H]−	17.1223
PA	PA(D31-16:0/18:1)	[M−H]−	6.30707
CL, LCL	CL(tetra14:0)	[M−2H]2−	10.7453
Cer	Cer(d18:1/17:0)	[M+Cl]−	12.0876
SM	SM(d18:1/17:0)	[M+H]+	37.2136
HexCer	GluCer(d18:1/12:0)	[M+Cl]−	20.7199
GM3	GM3(d18:1/D3-18:0)	[M−H]−	46.9313
GM1, GD3, GD1, GT1*, GQ1*	GM1(d18:1/D3-18:0)	[M−2H]2− ([M−3H]2−])*	38.7373
Sulf	Sulf(d18:1/12:0)	[M−H]−	9.21499
DG	DG(15:0/D7-18:1)	[M+NH4]+	37.8218
TG	TG(15:0/D7-18:1/15:0)	[M+NH4]+	136.876
CE	Chold7E(18:1)	[M+NH4]+	168.953
PC and PC-O, diacyl and alkyl-acyl phosphatidylcholine; PE and PE-P, diacyl and alkenyl-acyl phosphatidylethanolamine; PI, phosphatidylinositol; PS, phosphatidylserine; PG, phosphatidylglycerol; BMP, bis(monoacylglycero)phosphate; PA, phosphatidic acid; CL, cardiolipin; LPC, LPE, LPI, LPS, LPG, and LCL, the corresponding lysolipids;
SM, sphingomyelin; Cer, ceramide; HexCer, hexosylceramide; Sulf, sulfatide; GM3, GM3 monosialoganglioside; GD3, GD3 disialoganglioside; GD1, GD1 disialoganglioside; GT1, GT1 trisialoganglioside; GQ1, GQ1 tetrasialoganglioside;
DG, diacylglycerol; TG, triacylglycerol; and CE, cholesteryl ester.

## Sheet: S2 Liver_mol%
Table S2. Compositional data for the mouse liver lipidome (mol% of polar lipids)
Lipid species	mol% of membrane lipids
	Control	LMD	Control	LMD	LMD
	mean		SEM		CV%
LPC(16:0)	0.527005	1.09016	0.0354551	0.0274431	12.3324
LPC(18:2)	0.120264	0.260954	0.0107984	0.00738701	13.8679
LPC(18:1)	0.0984682	0.193123	0.00672233	0.00730504	18.5308
LPC(18:0)	0.387815	0.723633	0.0226545	0.0169156	11.4518
LPC(20:4)	0.0948637	0.156399	0.00995637	0.00424122	13.285
LPC(22:6)	0.0451113	0.0617794	0.00670676	0.00254562	20.1863
LPC	1.27353	2.48605	0.0782732	0.057416	11.3143
PC(32:2)	0.0597483	0.0670276	0.00352129	0.00380487	27.8094
PC(32:1)	0.337216	0.402299	0.00401511	0.0162469	19.7846
PC(32:0)	0.695188	0.734333	0.0136837	0.0366368	24.4416
PC(34:3)	0.776631	0.93763	0.0187075	0.0338774	17.7004
PC(34:2)	11.2785	12.3854	0.0293773	0.12505	4.94626
PC(34:1)	4.15376	5.17633	0.0262455	0.152076	14.3928
PC(36:5)	0.483997	0.560822	0.00249877	0.0136739	11.9446
PC(36:4)	8.86376	8.52373	0.0207022	0.159927	9.19174
PC(36:3)	2.29649	2.55084	0.0200868	0.0330517	6.34769
PC(36:2)	5.6018	5.62643	0.0959495	0.0491831	4.28242
PC(36:1)	0.456771	0.547971	0.00792477	0.022057	19.7194
PC(38:7)	0.17262	0.144777	0.00679605	0.005051	17.0917
PC(38:6)	6.3365	6.02729	0.0403937	0.0437945	3.55962
PC(38:5)	1.66643	1.67543	0.0120619	0.016939	4.95298
PC(38:4)	6.09039	5.55344	0.075493	0.15955	14.0747
PC(38:3)	0.486532	0.467427	0.00748782	0.00929483	9.74168
PC(40:8)	0.121265	0.0804503	0.00396394	0.0024625	14.9953
PC(40:7)	0.71868	0.672652	0.00767254	0.0127942	9.31812
PC(40:6)	1.71949	1.53849	0.0304125	0.0232949	7.41773
PC(40:5)	0.104258	0.0692945	0.00175387	0.00296947	20.9936
PC	52.4201	53.7421	0.247382	0.137095	1.24972
LPE(16:0)	0.0592154	0.116724	0.00672411	0.00441741	18.5401
LPE(18:2)	0.0101844	0.0159817	0.00196595	0.000968212	29.6793
LPE(18:1)	0.0589422	0.0809188	0.00551273	0.00249191	15.0865
LPE(18:0)	0.142549	0.277706	0.0109067	0.00650387	11.4734
LPE(20:4)	0.035083	0.0580708	0.00464131	0.00264504	22.3141
LPE(22:6)	0.0237641	0.03316	0.002018	0.00118987	17.5789
LPE	0.329738	0.582562	0.0305978	0.0142496	11.983
PE(34:2)	0.995255	1.0321	0.0119961	0.0206706	9.81154
PE(34:1)	0.166005	0.193612	0.00128667	0.00888879	22.4914
PE(36:4)	2.4381	2.20777	0.0356679	0.0198828	4.41194
PE(36:3)	0.707594	0.727394	0.0100974	0.0106437	7.1685
PE(36:2)	1.34786	1.28334	0.00562473	0.0190169	7.25948
PE(36:1)	0.140056	0.166487	0.00235876	0.00825071	24.2782
PE(38:7)	0.126738	0.118028	0.00221574	0.00424392	17.6152
PE(38:6)	5.42112	4.88143	0.0755226	0.10875	10.9141
PE(38:5)	2.04601	1.91158	0.0535441	0.0235117	6.02556
PE(38:4)	7.02678	5.95702	0.0265138	0.143693	11.8171
PE(38:3)	0.167975	0.161254	0.00243519	0.00245102	7.44633
PE(38:2)	0.0953391	0.101713	0.000675091	0.00151233	7.28409
PE(40:8)	0.0493858	0.040665	0.00107562	0.00147813	17.8073
PE(40:7)	1.16864	1.02729	0.0183397	0.0161819	7.7169
PE(40:6)	1.82052	1.52456	0.00693281	0.0284372	9.13794
PE(40:5)	0.136837	0.160924	0.0113817	0.00350295	10.6639
PE(40:4)	0.112425	0.113961	0.00504592	0.00591621	25.4328
PE	23.9666	21.6091	0.250867	0.103547	2.3475
PE-P(36:4)	0.210883	0.147279	0.00466391	0.00517583	17.2165
PE-P(38:4)	0.214174	0.140489	0.00385786	0.00591372	20.6217
PE-P*	0.425056	0.287768	0.00847151	0.0105463	17.9541
LPI(16:0)	0.007288	0.015656	0.00112055	0.000683223	21.379
LPI(18:1)	0.0296741	0.0269234	0.00358772	0.00136119	24.7682
LPI(18:0)	0.0882653	0.157295	0.0101634	0.00338831	10.5529
LPI(20:4)	0.0394377	0.0504641	0.0047554	0.00219619	21.3203
LPI	0.164665	0.250339	0.0125487	0.00646645	12.6544
PI(34:2)	0.147195	0.163293	0.00230598	0.00576625	17.2994
PI(36:4)	0.72083	0.751012	0.00856821	0.0118647	7.73957
PI(36:3)	0.148134	0.15812	0.00152306	0.00517502	16.0337
PI(36:2)	0.237324	0.235354	0.00273265	0.0105424	21.9443
PI(38:6)	0.0207902	0.0311391	0.0024191	0.00185779	29.2278
PI(38:5)	0.369107	0.380323	0.00279312	0.00552542	7.11735
PI(38:4)	9.05658	8.80447	0.0719165	0.0624871	3.47691
PI(40:6)	0.079758	0.0588945	0.0018396	0.00313959	26.1159
PI(40:5)	0.0367621	0.0334144	0.00120365	0.00154323	22.6257
PI(40:4)	0.0230441	0.0259975	0.00150034	0.00152683	28.7716
PI	10.8395	10.642	0.076289	0.0710175	3.26924
LPS(18:0)	0.0108219	0.0237229	0.0019917	0.0010758	22.2162
LPS	0.0108219	0.0237229	0.0019917	0.0010758	22.2162
PS(36:4)	0.255465	0.239744	0.005185	0.0067281	13.7483
PS(36:2)	0.146961	0.129174	0.00367725	0.00676662	25.6626
PS(36:1)	0.0936496	0.0729056	0.00153437	0.00357955	24.0532
PS(38:6)	0.211913	0.216535	0.00356428	0.0044975	10.1753
PS(38:5)	0.0838234	0.0883437	0.000186843	0.00127518	7.07135
PS(38:4)	2.45892	2.1458	0.0364907	0.0635318	14.5046
PS(38:3)	0.0553583	0.057925	0.000923349	0.00359303	30.3879
PS(40:6)	1.18844	1.12921	0.0213527	0.0341911	14.8335
PS(40:5)	0.0573702	0.0595275	0.00186598	0.00363034	29.8769
PS(40:4)	0.0917383	0.0760476	0.00408622	0.00309015	19.9067
PS	4.64364	4.21522	0.0685465	0.0408555	4.74827
LPG(22:6)	0.0050507	0.00452196	0.000800894	0.000239254	25.9202
LPG*	0.0050507	0.00452196	0.000800894	0.000239254	25.9202
PG(34:2)	0.0388089	0.0371265	0.000694045	0.000585084	7.72039
PG(34:1)	0.1206	0.130208	0.00107223	0.00419911	15.7988
PG(36:4)	0.0130565	0.0141125	0.000648036	0.00033429	11.6045
PG(36:3)	0.0206545	0.0247587	0.000804201	0.000412091	8.15401
PG(36:2)	0.0498964	0.0523585	0.000735686	0.000614819	5.75263
PG(36:1)	0.00545331	0.00763532	0.00019773	0.00044418	28.4995
PG(38:4)	0.0149297	0.0103818	0.00137263	0.000581752	27.4518
PG(40:8)	0.0279657	0.0280666	0.00122691	0.000784192	13.688
PG(40:7)	0.0253041	0.0286899	0.00123821	0.000924067	15.779
PG(40:6)	0.0101123	0.00799381	0.00114402	0.000401016	24.5761
PG(44:12)	0.0409876	0.0335437	0.00151858	0.0012885	18.8182
PG*	0.367769	0.374876	0.00363419	0.00363907	4.75563
PA(34:2)	0.0681299	0.0671364	0.00314673	0.00332282	24.2468
PA(34:1)	0.0401655	0.0573033	0.00176735	0.00255281	21.8245
PA(36:4)	0.0447137	0.0457648	0.00594385	0.00212084	22.7029
PA(36:3)	0.0202426	0.0428578	0.00244515	0.00241714	27.6297
PA(36:2)	0.0323108	0.0542008	0.00324145	0.0030665	27.7168
PA(38:6)	0.0292214	0.0277756	0.00584675	0.0013939	24.5853
PA(38:5)	0.00670494	0.0208356	0.00241282	0.00081499	19.1624
PA(38:4)	0.0366837	0.111128	0.00339864	0.00373521	16.4663
PA(40:6)	0.00726184	0.0332259	0.00330504	0.00118386	17.4555
PA	0.285434	0.460228	0.0274726	0.0165076	17.5718
CL(70:7)	0.122041	0.142234	0.00176021	0.00621877	21.4193
CL(70:6)	0.0429639	0.0457111	0.00351795	0.00155111	16.6236
CL(70:5)	0.0322229	0.0323109	0.00175677	0.00105546	16.0029
CL(70:4)	0.0196512	0.0227123	0.00276236	0.000823015	17.7522
CL(72:9)	0.0456763	0.0500577	0.0014569	0.0024037	23.5242
CL(72:8)	1.33904	1.36962	0.0378877	0.0231075	8.26528
CL(72:7)	0.318265	0.342053	0.0218431	0.0103803	14.8669
CL(74:10)	0.0388652	0.0365169	0.000718947	0.000698572	9.37181
CL(74:9)	0.111921	0.110149	0.00441036	0.00219179	9.7482
CL(74:8)	0.0984129	0.103636	0.0043777	0.00502216	23.7403
CL(74:7)	0.0176504	0.0219675	0.00194305	0.00134228	29.9343
CL(76:12)	0.0349941	0.029518	0.00116168	0.000951051	15.7842
CL(76:11)	0.0168307	0.0128276	0.00269093	0.000480985	18.3692
CL	2.23853	2.31932	0.0799552	0.0496165	10.4803
LCL(54:6)	0.0165804	0.0190316	0.000668726	0.00046832	12.0552
LCL	0.0165804	0.0190316	0.000668726	0.00046832	12.0552
SM(34:1:2)	0.539998	0.577025	0.010255	0.0216843	18.4101
SM(36:1:2)	0.127241	0.118939	0.00423873	0.00643015	26.4851
SM(38:1:2)	0.0642837	0.0600553	0.0020368	0.00355305	28.9838
SM(40:2:2)	0.0374343	0.0385971	0.000932067	0.00211876	26.8926
SM(40:1:2)	0.356972	0.359433	0.00876136	0.0142788	19.4616
SM(41:2:2)	0.0305174	0.0345307	0.00103047	0.00186363	26.4399
SM(41:1:2)	0.201853	0.194939	0.0036079	0.00608053	15.2809
SM(42:3:2)	0.119128	0.13183	0.00271409	0.0058991	21.9218
SM(42:2:2)	0.751938	0.791642	0.00187154	0.0137661	8.51901
SM(42:1:2)	0.464371	0.375179	0.0066029	0.0116258	15.1806
SM	2.69374	2.68217	0.0350949	0.0618124	11.29
Cer(34:1:2)	0.0276092	0.0347951	0.000946713	0.00184451	25.9698
Cer(36:1:2)	0.0108811	0.0168177	0.000454922	0.000922285	26.8662
Cer(40:1:2)	0.0432176	0.04305	0.00268742	0.00248184	28.2427
Cer(41:1:2)	0.0357524	0.0360447	0.00143314	0.00186601	25.3617
Cer(42:2:2)	0.124584	0.0945787	0.00244828	0.0026271	13.6078
Cer(42:1:2)	0.0771893	0.075682	0.00233562	0.00353098	22.8564
Cer	0.319233	0.300968	0.00988762	0.0116061	18.8918
DG(34:3)	0.398276	0.772707	0.0241807	0.0266077	16.8693
DG(34:2)	2.2581	3.47542	0.18099	0.0667243	9.40551
DG(34:1)	0.90774	2.08563	0.0779646	0.0421302	9.89604
DG(36:5)	0.230031	0.307765	0.0215602	0.0107416	17.0984
DG(36:4)	1.23719	2.07301	0.0909391	0.0388532	9.18185
DG(36:3)	2.27328	4.57052	0.216145	0.0887866	9.51673
DG(36:2)	1.21636	2.86447	0.12409	0.0937392	16.0318
DG(38:6)	0.312645	0.347899	0.0214647	0.00738877	10.4046
DG(38:5)	0.251362	0.38167	0.023158	0.0115674	14.8475
DG(38:4)	0.264615	0.319679	0.0201499	0.0166669	25.5414
DG(40:6)	0.0878101	0.10939	0.00732717	0.00489615	21.9271
DG	9.43741	17.3082	0.797253	0.355393	10.0592
TG(50:4)	0.272808	0.207108	0.00436449	0.0105781	25.0216
TG(50:3)	1.2134	0.916591	0.0215968	0.0426398	22.7901
TG(50:2)	1.80797	1.44441	0.032957	0.0408485	13.8545
TG(50:1)	0.741702	0.651649	0.0153186	0.0231996	17.441
TG(52:6)	0.259792	0.113867	0.00706284	0.006012	25.8659
TG(52:5)	1.17348	0.678773	0.0273206	0.0204081	14.7294
TG(52:4)	5.01364	3.06734	0.105988	0.0840526	13.4244
TG(52:3)	7.77464	5.37491	0.149995	0.131171	11.9557
TG(52:2)	4.21656	3.30237	0.0733861	0.0971237	14.408
TG(54:7)	0.416638	0.219608	0.0112225	0.00753807	16.8158
TG(54:6)	1.38464	0.834182	0.0322791	0.0240514	14.1249
TG(54:5)	2.53155	1.7655	0.0565244	0.0422185	11.7149
TG(54:4)	2.82747	2.18415	0.0605178	0.0500435	11.2246
TG(54:3)	1.81284	1.50469	0.0330348	0.0428093	13.9379
TG(54:2)	0.253546	0.238241	0.00426922	0.0108197	22.2488
TG(56:8)	0.799778	0.402328	0.0236852	0.009373	11.4131
TG(56:7)	0.852506	0.481273	0.0230739	0.0116847	11.8941
TG(56:6)	0.705609	0.447846	0.0166127	0.0104628	11.4453
TG(56:5)	0.286118	0.209464	0.00476564	0.0041084	9.60879
TG(56:4)	0.194199	0.161973	0.00724824	0.00528371	15.9809
TG(56:3)	0.0531068	0.0574105	0.00396809	0.00328474	28.0295
TG(58:9)	0.308802	0.182527	0.00621225	0.00597779	16.0442
TG(58:8)	0.24948	0.158229	0.00484746	0.00418262	12.9499
TG(58:7)	0.114609	0.0800624	0.0021748	0.00473684	28.9845
TG	35.2649	24.6845	0.687585	0.602091	11.9493
CE(18:2)	0.446856	0.630182	0.0154324	0.0348784	27.1142
CE(18:1)	0.47624	0.610786	0.0149249	0.0312191	25.0402
CE	0.923097	1.24097	0.0303406	0.0640492	25.2847
Class
LPC	1.27353	2.48605	0.0782732	0.057416	11.3143
PC	52.4201	53.7421	0.247382	0.137095	1.24972
LPE	0.329738	0.582562	0.0305978	0.0142496	11.983
PE	23.9666	21.6091	0.250867	0.103547	2.3475
PE-P*	0.425056	0.287768	0.00847151	0.0105463	17.9541
LPI	0.164665	0.250339	0.0125487	0.00646645	12.6544
PI	10.8395	10.642	0.076289	0.0710175	3.26924
LPS	0.0108219	0.0237229	0.0019917	0.0010758	22.2162
PS	4.64364	4.21522	0.0685465	0.0408555	4.74827
LPG*	0.0050507	0.00452196	0.000800894	0.000239254	25.9202
PG/BMP*	0.367769	0.374876	0.00363419	0.00363907	4.75563
PA	0.285434	0.460228	0.0274726	0.0165076	17.5718
CL	2.23853	2.31932	0.0799552	0.0496165	10.4803
LCL	0.0165804	0.0190316	0.000668726	0.00046832	12.0552
SM	2.69374	2.68217	0.0350949	0.0618124	11.29
Cer	0.319233	0.300968	0.00988762	0.0116061	18.8918
DG	9.43741	17.3082	0.797253	0.355393	10.0592
TG	35.2649	24.6845	0.687585	0.602091	11.9493
CE	0.923097	1.24097	0.0303406	0.0640492	25.2847
Membrane lipids	100	100	1.08537e-14	4.95094e-15
sum(LPL+PA)	2.08582	3.82645	0.112919	0.0743693
Membrane lipids/liver wet weight (nmol/mg)	39.5282	37.9812	1.58905	1.37273
Data represent mean ± SEM (n = 4 for full cryosections used as controls; n = 24 for LMD spots, 6−9 spots from 3 successive sections). Green fill indicates CV% < 30, 20 or 10 in the order of darkness.
LMD, laser microdissection.
PC, diacyl phosphatidylcholine; PE and PE-P, diacyl and alkenyl-acyl phosphatidylethanolamine; PI, phosphatidylinositol; PS, phosphatidylserine; PG, phosphatidylglycerol; BMP, bis(monoacylglycero)phosphate; PA, phosphatidic acid; CL, cardiolipin; LPC, LPE, LPI, LPS, LPG, and LCL, the corresponding lysolipids;
SM, sphingomyelin; Cer, ceramide; DG, diacylglycerol; TG, triacylglycerol; and CE, cholesteryl ester.
Membrane lipids were calculated as the sum of glycerophospho- and sphingolipids, i.e., all quantified lipid species, excluding DG, TG, and CE.
Sum formulas for glycero(phospho)lipids are defined as the lipid class abbreviation followed by the total number of carbons and total number of double bonds for all chains, e.g. PC(34:1).
Sum formulas for sphingolipids are defined as the lipid class abbreviation followed by the total number of carbons, total number of double bonds and total number of hydroxyl groups in the long chain base and the fatty acyl moiety, e.g. Cer(34:1:2).
* PC/PE-O(x:y), alkyl-acyl and PC/PE-P(x:y-1), alkenyl-acyl species as well as PG and BMP species are isomeric and therefore could not be resolved by the applied shotgun strategy.
For simplicity, for PC/PE, we indicated the more likely annotation based on literature data and our previous works, whereas for PG/BMP, PG or LPG was used in the species list.

## Sheet: S3 Kidney_pmol
Table S3. Absolute lipid content data for mouse kidney samples
	Membrane lipid content (pmol)
LMD area (x1000 µm2)	5	10	20	40	80	160	5	10	20	40	80	160	5	10	20	40	80	160	R2
Lipid species	mean						SD						CV%								pmol
LPC(16:0)	0.017686	0.0412874	0.0765468	0.123606	0.215367	0.50803	0.00595545	0.00805711	0.0142922	0.0157644	0.0228445	0.0717855	33.6733	19.5147	18.6712	12.7537	10.6072	14.1302	0.981821		17.686
LPC(18:2)	0.0059548	0.0147172	0.0358923	0.0524173	0.0681228	0.152739	0.00172507	0.00398779	0.00840934	0.00946014	0.00343397	0.0218914	28.9694	27.0961	23.4293	18.0477	5.04086	14.3326	0.970282		5.9548
LPC(18:1)	0.00541932	0.0103273	0.0200346	0.0279798	0.0457034	0.089416	0.00141655	0.00263981	0.00514234	0.00434214	0.0122754	0.0134449	26.1389	25.5614	25.6673	15.5188	26.8588	15.0363	0.968306		5.41932
LPC(18:0)	0.0113462	0.0204795	0.0477753	0.0712696	0.12076	0.279827	0.004121	0.00275531	0.00930129	0.0113425	0.012195	0.0298874	36.3204	13.454	19.4688	15.915	10.0985	10.6807	0.98594		11.3462
LPC(20:4)	0.00473193	0.0125506	0.0250407	0.0399756	0.0500202	0.141609	0.00311537	0.00498144	0.0043876	0.00845644	0.00617247	0.0118515	65.8372	39.6908	17.5219	21.154	12.34	8.36918	0.972695		4.73193
LPC(20:3)	0	0.00102486	0.0027975	0.0058025	0.00847946	0.0217005	0	0.00044475	0.000768296	0.00128409	0.00139871	0.00221953		43.3961	27.4637	22.1299	16.4953	10.228	0.981753		0
LPC(22:6)	0.0133306	0.0320998	0.0664191	0.106426	0.185913	0.366745	0.00363085	0.00836659	0.016817	0.0183583	0.00879543	0.0328016	27.237	26.0643	25.3195	17.2498	4.73094	8.94399	0.990687		13.3306
LPC	0.0584688	0.132487	0.274506	0.427478	0.694367	1.56007	0.0193038	0.0303769	0.034545	0.0669379	0.0515611	0.172644	33.0156	22.9282	12.5844	15.6588	7.42563	11.0664	0.986591		58.4688
																					0
PC(32:0)	0.101157	0.252191	0.441809	0.658704	1.71597	3.72173	0.0261293	0.0371391	0.10008	0.0408758	0.194117	0.295818	25.8305	14.7266	22.6523	6.2055	11.3124	7.94839	0.991261		101.157
PC(34:3)	0.00285112	0.00903541	0.0210662	0.0341542	0.0557753	0.108976	0.000842224	0.00213703	0.00424173	0.00383109	0.00386186	0.0126285	29.5401	23.6517	20.1352	11.217	6.92396	11.5883	0.986469		2.85112
PC(34:2)	0.126819	0.270172	0.588445	0.869891	1.6827	3.2996	0.0267232	0.028589	0.109188	0.12939	0.149014	0.136949	21.072	10.5817	18.5552	14.8742	8.85565	4.15047	0.995261		126.819
PC(34:1)	0.0711664	0.15491	0.335264	0.499151	0.871596	1.7253	0.0218832	0.012627	0.0763406	0.0864553	0.0397364	0.0564128	30.7493	8.1512	22.7703	17.3205	4.55904	3.26975	0.99445		71.1664
PC(34:0)	0.00627335	0.0155976	0.0300659	0.0455623	0.0958469	0.213762	0.00133992	0.00201082	0.0076637	0.00515899	0.0108018	0.0194652	21.3589	12.8919	25.4897	11.3229	11.2698	9.10601	0.99026		6.27335
PC(36:5)	0.0015065	0.0081371	0.0170026	0.0294994	0.0489452	0.103457	0.00120186	0.000722392	0.00215173	0.00387866	0.00595091	0.00672098	79.7782	8.87776	12.6553	13.1483	12.1583	6.49641	0.992096		1.5065
PC(36:4)	0.0893284	0.180373	0.389913	0.669067	1.162	2.45334	0.0264328	0.0171953	0.0949877	0.116792	0.109948	0.210335	29.5906	9.53317	24.3613	17.456	9.46198	8.57345	0.991176		89.3284
PC(36:3)	0.0337896	0.066158	0.147864	0.218086	0.41196	0.906875	0.00956113	0.00450277	0.0275305	0.0386811	0.0215836	0.0317593	28.2961	6.80609	18.6188	17.7366	5.23924	3.50206	0.994854		33.7896
PC(36:2)	0.0711027	0.15809	0.384321	0.59345	0.923392	1.77332	0.0222435	0.020811	0.0763372	0.134021	0.0779591	0.102119	31.2836	13.164	19.8629	22.5834	8.44268	5.75861	0.987316		71.1027
PC(36:1)	0.0200738	0.0342316	0.0830808	0.117207	0.180021	0.349494	0.00949267	0.00519244	0.0259123	0.0265236	0.0149485	0.0615715	47.289	15.1685	31.1893	22.6298	8.30373	17.6173	0.967909		20.0738
PC(38:7)	0.000711324	0.00892099	0.0177684	0.0332549	0.0602143	0.110436	0.000821388	0.00117536	0.00386081	0.00474869	0.00653446	0.0125588	115.473	13.1752	21.7286	14.2797	10.852	11.3721	0.986401		0.711324
PC(38:6)	0.273091	0.624674	1.37866	1.95583	4.0341	7.78907	0.0485562	0.0798586	0.263691	0.270651	0.335312	0.796404	17.7802	12.7841	19.1265	13.8381	8.31193	10.2246	0.990471		273.091
PC(38:5)	0.0230756	0.0432129	0.0928728	0.158877	0.231724	0.711346	0.00886059	0.00592859	0.0316733	0.031034	0.0494836	0.0148788	38.3981	13.7195	34.104	19.5333	21.3545	2.09164	0.976628		23.0756
PC(38:4)	0.0691336	0.135031	0.301333	0.50587	0.775847	1.68516	0.0265431	0.0193731	0.0872148	0.0942049	0.025156	0.229603	38.3939	14.3472	28.943	18.6224	3.2424	13.625	0.981873		69.1336
PC(38:3)	0.00941368	0.0241928	0.0591191	0.0903576	0.142098	0.241319	0.00373239	0.00344363	0.0122056	0.0236875	0.01565	0.0308518	39.6485	14.2341	20.6458	26.2153	11.0135	12.7847	0.970367		9.41368
PC(38:2)	0.000354578	0.00275854	0.00542007	0.0144624	0.0217509	0.0366481	0.000709156	0.00192431	0.00488195	0.00378704	0.00369302	0.0111241	200	69.7582	90.0718	26.1854	16.9787	30.3538	0.922954		0.354578
PC(40:8)	0.00494069	0.0142379	0.0284953	0.0435659	0.0950663	0.21437	0.00191803	0.00211981	0.00509664	0.00683744	0.00603534	0.0101115	38.8211	14.8885	17.8859	15.6945	6.34856	4.71684	0.99456		4.94069
PC(40:7)	0.0107016	0.0252804	0.0559873	0.0906474	0.182801	0.34683	0.00187161	0.00302786	0.0117198	0.0139338	0.0158275	0.0525429	17.4891	11.9771	20.9329	15.3715	8.65835	15.1494	0.984109		10.7016
PC(40:6)	0.0761509	0.175656	0.411955	0.644526	1.09332	2.12907	0.015007	0.0262923	0.084103	0.125359	0.116508	0.424498	19.7069	14.9681	20.4156	19.4498	10.6564	19.9382	0.970915		76.1509
PC(40:5)	0.00205307	0.00983147	0.0179332	0.033214	0.0792837	0.249384	0.00238716	0.00184756	0.00610864	0.00742644	0.0128246	0.020035	116.273	18.7923	34.0633	22.3594	16.1756	8.03377	0.977381		2.05307
PC	0.993694	2.21269	4.80838	7.30538	13.8644	28.1695	0.210247	0.23484	0.823751	1.14576	0.808166	2.05205	21.1581	10.6133	17.1316	15.6838	5.82906	7.28465	0.994		993.694
																					0
PC-O(32:1)	0.000279735	0.00361078	0.00570676	0.00796191	0.0208977	0.0516814	0.000559469	0.0014558	0.00350632	0.00242636	0.00380959	0.00936279	200	40.318	61.4415	30.4745	18.2297	18.1164	0.968517		0.279735
PC-O(32:0)	0.0250506	0.0312343	0.0442044	0.0624502	0.169267	0.440626	0.00164728	0.00275655	0.0208508	0.00531663	0.0268319	0.052099	6.57582	8.82538	47.1691	8.51338	15.8518	11.8239	0.975365		25.0506
PC-O(34:2)	0.0076166	0.01763	0.0414836	0.049039	0.107746	0.194202	0.00157661	0.00235792	0.0193655	0.00790283	0.00993015	0.0311211	20.6997	13.3745	46.6822	16.1154	9.21623	16.0251	0.97358		7.6166
PC-O(34:1)	0.00852872	0.0239116	0.051419	0.061666	0.149958	0.246025	0.0016803	0.00452804	0.0221199	0.0082788	0.0214792	0.0587901	19.7017	18.9366	43.019	13.4252	14.3235	23.896	0.953524		8.52872
PC-O(36:4)	0.0105383	0.0211275	0.0457215	0.0657621	0.159842	0.392711	0.0018198	0.00191523	0.0158103	0.011629	0.0208404	0.0467059	17.2685	9.06509	34.5796	17.6834	13.0381	11.8932	0.982951		10.5383
PC-O(38:6)	0.249641	0.603799	1.22701	1.88109	4.19328	8.85879	0.0478334	0.0852592	0.346773	0.267589	0.464919	1.9436	19.1609	14.1205	28.2617	14.2252	11.0873	21.9398	0.970343		249.641
PC-O*	0.301655	0.701313	1.41555	2.12797	4.80099	10.184	0.0480543	0.0973032	0.412252	0.300188	0.52677	2.1277	15.9302	13.8744	29.1232	14.1068	10.9721	20.8925	0.972347		301.655
																					0
LPE(16:0)	0.00163278	0.00325227	0.00622929	0.00835175	0.0139029	0.0293963	0.000754481	0.000686123	0.000943803	0.00124507	0.00123562	0.00550747	46.2083	21.0967	15.151	14.9079	8.88753	18.7353	0.971692		1.63278
LPE(18:2)	0.000741674	0.00219737	0.00498642	0.00515959	0.0075201	0.0163569	0.000575259	0.000274387	0.00099742	0.000733985	0.000926542	0.00300781	77.5623	12.4871	20.0027	14.2257	12.3209	18.3886	0.95338		0.741674
LPE(18:1)	0.00248311	0.00622368	0.00952985	0.0128332	0.0190687	0.0412333	0.000551731	0.00100755	0.00192106	0.00154846	0.00260319	0.00872736	22.2193	16.1889	20.1583	12.066	13.6516	21.1658	0.959453		2.48311
LPE(18:0)	0.00787184	0.0147243	0.0310762	0.0416172	0.0716739	0.14614	0.00239003	0.00282938	0.00614938	0.00469077	0.00612762	0.0222115	30.3617	19.2157	19.7881	11.2712	8.5493	15.1988	0.980204		7.87184
LPE(20:4)	0.00603448	0.0158118	0.0383631	0.0592478	0.0726065	0.154948	0.00126694	0.00327842	0.00783758	0.0123659	0.00920505	0.0329356	20.995	20.734	20.43	20.8714	12.678	21.256	0.950533		6.03448
LPE	0.0187639	0.0422094	0.0901848	0.12721	0.184772	0.388074	0.00541119	0.00798229	0.0152939	0.0204348	0.0152771	0.0716745	28.8383	18.9112	16.9584	16.0639	8.26809	18.4693	0.968533		18.7639
																					0
PE(34:2)	0.00707367	0.0122562	0.0302188	0.0365715	0.0862445	0.183665	0.00268977	0.00136259	0.00840415	0.009368	0.00945127	0.00552425	38.025	11.1175	27.811	25.6156	10.9587	3.00779	0.991682		7.07367
PE(34:1)	0.00623281	0.0102659	0.0240413	0.0322651	0.0560445	0.125617	0.00309687	0.00163611	0.00898413	0.00635305	0.00273327	0.0141089	49.6867	15.9372	37.3696	19.6901	4.87697	11.2316	0.982739		6.23281
PE(36:4)	0.0550085	0.110712	0.245655	0.357786	0.741197	1.57252	0.017584	0.0144051	0.0571468	0.0774297	0.0662164	0.151462	31.966	13.0113	23.263	21.6414	8.93371	9.63181	0.990039		55.0085
PE(36:3)	0.00831007	0.0139251	0.0312477	0.0451756	0.0990446	0.282282	0.00314735	0.000719009	0.00678243	0.00946859	0.00842419	0.017063	37.874	5.16339	21.7054	20.9595	8.50546	6.04468	0.982904		8.31007
PE(36:2)	0.0272866	0.0510962	0.116312	0.170695	0.29663	0.633317	0.00810368	0.00529697	0.024371	0.032307	0.0185647	0.0101772	29.6984	10.3667	20.953	18.9267	6.25854	1.60697	0.994279		27.2866
PE(36:1)	0.00534366	0.00766596	0.0286497	0.0258723	0.045093	0.101378	0.00486116	0.000422922	0.025044	0.00331184	0.00164442	0.0093878	90.9707	5.51688	87.4146	12.8007	3.64673	9.2602	0.940826		5.34366
PE(38:7)	0	0.00397788	0.00355868	0.0034891	0.0225736	0.0699172	0	0.00168974	0.00204783	0.00345233	0.00399648	0.00967506		42.4784	57.5448	98.9461	17.7042	13.8379	0.961621		0
PE(38:6)	0.0305919	0.0695145	0.135276	0.20324	0.506706	1.16773	0.00805149	0.0106576	0.0212742	0.0282899	0.0682799	0.0600993	26.3191	15.3315	15.7265	13.9195	13.4752	5.14668	0.9918		30.5919
PE(38:5)	0.0521785	0.0948155	0.218244	0.384176	0.547204	1.47691	0.0158097	0.01397	0.0781094	0.0932662	0.049452	0.12941	30.2992	14.7339	35.7899	24.2769	9.03721	8.76225	0.979505		52.1785
PE(38:4)	0.254892	0.564017	1.23377	1.84792	3.72663	7.75488	0.0519761	0.0812208	0.229712	0.298033	0.253696	0.472619	20.3914	14.4004	18.6187	16.128	6.80766	6.09448	0.994763		254.892
PE(38:2)	0.000681774	0.00330775	0.00895798	0.0125854	0.0191238	0.0338156	0.00136355	0.000549504	0.00207399	0.00279533	0.00272466	0.00299428	200	16.6126	23.1524	22.211	14.2475	8.85472	0.97077		0.681774
PE(40:7)	0.0218071	0.0488059	0.0938256	0.141726	0.410596	0.783323	0.0101291	0.00874688	0.0211604	0.0130597	0.0687522	0.0733183	46.4485	17.9218	22.5529	9.21478	16.7445	9.35991	0.987544		21.8071
PE(40:6)	0.0492911	0.120587	0.252611	0.369501	0.801247	1.66877	0.0100103	0.018687	0.064536	0.0594316	0.0743676	0.158752	20.3085	15.4968	25.5476	16.0843	9.28149	9.5131	0.990918		49.2911
PE(40:5)	0.00404762	0.00763555	0.0176839	0.0299611	0.052448	0.125187	0.00157351	0.000919515	0.00414925	0.00460508	0.00467416	0.00646142	38.8749	12.0426	23.4635	15.3702	8.91199	5.16142	0.99197		4.04762
PE	0.522745	1.11858	2.44005	3.66097	7.41078	15.9793	0.114154	0.149977	0.420312	0.631916	0.468971	0.865189	21.8374	13.4078	17.2255	17.2609	6.32823	5.41443	0.994819		522.745
																					0
PE-P(36:4)	0.0400478	0.0936738	0.19416	0.331777	0.510971	0.97541	0.0146893	0.0152196	0.039132	0.0657264	0.0678834	0.210069	36.6794	16.2474	20.1545	19.8104	13.2852	21.5365	0.963478		40.0478
PE-P(38:4)	0.024824	0.05421	0.126222	0.190074	0.290975	0.668072	0.00932901	0.00255732	0.0495308	0.0266011	0.029962	0.0455447	37.5806	4.71744	39.2411	13.9951	10.2971	6.81733	0.985771		24.824
PE-P*	0.0648718	0.147884	0.320382	0.521851	0.801946	1.64348	0.0238127	0.015237	0.084446	0.0874761	0.0970295	0.221058	36.7073	10.3034	26.3579	16.7626	12.0993	13.4506	0.980473		64.8718
																					0
LPI(16:0)	0.00105064	0.00248404	0.0040676	0.0054126	0.0107579	0.0200388	0.000255769	0.000524225	0.000547378	0.000694071	0.00105437	0.00538803	24.3442	21.1037	13.457	12.8232	9.80094	26.888	0.954306		1.05064
LPI(18:1)	0.0023236	0.00467202	0.00575343	0.00665328	0.0123732	0.0224943	0.000372201	0.000750654	0.00322138	0.000377839	0.00101584	0.00444245	16.0183	16.067	55.9906	5.67899	8.21	19.7492	0.953851		2.3236
LPI(18:0)	0.00779025	0.0169748	0.0331061	0.0428003	0.0950491	0.196505	0.00160941	0.00329527	0.0073885	0.00847887	0.00604386	0.0298034	20.6593	19.4127	22.3176	19.8103	6.35867	15.1667	0.982135		7.79025
LPI(20:4)	0.00174198	0.0031482	0.00706545	0.00968641	0.0189676	0.0474946	0.000626835	0.000532626	0.001098	0.00166161	0.00109799	0.00632625	35.984	16.9184	15.5405	17.154	5.78875	13.3199	0.980955		1.74198
LPI(20:3)	0.00116023	0.0019284	0.00323253	0.00465272	0.00960124	0.0199685	0.000444063	0.00055888	0.000710559	0.000665868	0.000566239	0.00598217	38.2738	28.9816	21.9815	14.3114	5.89757	29.9581	0.947115		1.16023
LPI	0.0140667	0.0292074	0.0532252	0.0692053	0.146749	0.306501	0.00254579	0.00545304	0.0113422	0.0117624	0.00630454	0.0512425	18.098	18.67	21.3099	16.9963	4.29614	16.7185	0.979447		14.0667
																					0
PI(34:2)	0.00454199	0.00923506	0.0194899	0.0266447	0.0511353	0.089537	0.00142085	0.00105052	0.00368656	0.00429552	0.00454493	0.00825291	31.2826	11.3753	18.9152	16.1215	8.88806	9.21732	0.987471		4.54199
PI(36:4)	0.0115058	0.0232399	0.0459418	0.0723865	0.136209	0.324598	0.00328101	0.00211229	0.0106914	0.00924484	0.00182119	0.0198954	28.5161	9.08904	23.2716	12.7715	1.33705	6.12926	0.992079		11.5058
PI(36:3)	0.00267601	0.00681497	0.0134768	0.0193839	0.045046	0.0926449	0.000913487	0.00117992	0.00300573	0.00184667	0.00278779	0.012164	34.1361	17.3136	22.303	9.52681	6.18876	13.1297	0.987559		2.67601
PI(36:2)	0.0145336	0.0317392	0.0681023	0.0969806	0.18275	0.397221	0.00305447	0.00361147	0.0142582	0.0181379	0.0253188	0.0314107	21.0165	11.3786	20.9365	18.7026	13.8544	7.90762	0.98953		14.5336
PI(36:1)	0.00105247	0.00205645	0.00581561	0.00847922	0.0138653	0.0237944	0.00151358	0.000573671	0.00173044	0.00266564	0.00143707	0.00167745	143.812	27.8963	29.7551	31.4373	10.3645	7.04979	0.973083		1.05247
PI(38:6)	0.0177595	0.046388	0.0927452	0.138049	0.257926	0.473832	0.0046421	0.00742177	0.020622	0.0164172	0.0331647	0.0975259	26.1387	15.9993	22.2352	11.8923	12.8582	20.5824	0.969806		17.7595
PI(38:5)	0.00442347	0.00860988	0.0171676	0.023867	0.0529157	0.127198	0.00159425	0.000872069	0.00459288	0.00226473	0.00108146	0.00390492	36.0406	10.1287	26.7532	9.48896	2.04374	3.06995	0.992346		4.42347
PI(38:4)	0.0925614	0.190235	0.415835	0.634012	1.26415	2.82188	0.0186852	0.0208017	0.0684584	0.123155	0.0784896	0.237987	20.1868	10.9347	16.4629	19.4247	6.2089	8.43363	0.991717		92.5614
PI(40:6)	0.0640936	0.175195	0.361134	0.512767	0.934303	1.86886	0.0130329	0.0293026	0.090123	0.0639875	0.146531	0.0920826	20.3341	16.7257	24.9555	12.4789	15.6834	4.9272	0.990785		64.0936
PI	0.213148	0.493513	1.03971	1.53257	2.9383	6.21957	0.0400783	0.0634221	0.173504	0.238535	0.18718	0.414271	18.803	12.8511	16.6877	15.5644	6.37037	6.66076	0.993912		213.148
																					0
LPS(18:0)	0.00319493	0.00796014	0.0159361	0.0214883	0.0326119	0.0464469	0.00089009	0.000586877	0.00342911	0.00456573	0.00514835	0.00961208	27.8594	7.3727	21.5178	21.2475	15.7867	20.6948	0.926611		3.19493
LPS(20:4)	0.000786127	0.00227195	0.00588217	0.00827161	0.0135442	0.0281016	0.000327227	0.000473769	0.00141026	0.00207038	0.000701861	0.00578903	41.6252	20.853	23.9752	25.0299	5.18201	20.6004	0.966543		0.786127
LPS(22:6)	0	0.000225899	0.000840867	0.00457807	0.00706755	0.0111558	0	0.000317059	0.000971448	0.00116006	0.000238596	0.00243912		140.355	115.529	25.3395	3.37594	21.8641	0.94519		0
LPS	0.00398106	0.010458	0.0226592	0.034338	0.0532236	0.0857043	0.00109243	0.00113837	0.00535072	0.00775563	0.00524807	0.0177471	27.4407	10.8852	23.6139	22.5861	9.86041	20.7074	0.951894		3.98106
																					0
PS(36:4)	0.0107452	0.0244193	0.0527355	0.0829151	0.188772	0.435989	0.0024296	0.00213148	0.0121063	0.0170575	0.0346307	0.0170855	22.611	8.72868	22.9566	20.5722	18.3453	3.91878	0.991063		10.7452
PS(36:2)	0.0177579	0.0348236	0.0748379	0.106346	0.187228	0.431554	0.00590936	0.00359437	0.0174492	0.0245226	0.016995	0.0224947	33.2773	10.3217	23.316	23.0592	9.07721	5.21249	0.989855		17.7579
PS(36:1)	0.0127837	0.0250733	0.0543303	0.0884072	0.131425	0.346897	0.00582706	0.0019672	0.0272593	0.00927269	0.0196051	0.0710572	45.5819	7.84578	50.1732	10.4886	14.9174	20.4836	0.960236		12.7837
PS(38:6)	0.0065091	0.0192311	0.0376714	0.0537335	0.129841	0.296572	0.00151149	0.00311204	0.0127104	0.00797742	0.0205263	0.0396625	23.2212	16.1824	33.7403	14.8463	15.8088	13.3736	0.982364		6.5091
PS(38:5)	0.00279667	0.00719392	0.0176265	0.0266765	0.0455682	0.114767	0.000522983	0.00128208	0.00151418	0.00519682	0.00316596	0.0108342	18.7002	17.8218	8.59033	19.4809	6.94773	9.44017	0.985941		2.79667
PS(38:4)	0.113169	0.255207	0.590835	0.912743	1.70716	3.61007	0.0268176	0.0237281	0.12781	0.211477	0.142057	0.234963	23.697	9.29759	21.6321	23.1694	8.32124	6.50855	0.992614		113.169
PS(38:3)	0.00354568	0.0081425	0.0196765	0.0286234	0.0476742	0.0755835	0.00100395	0.00255972	0.00692563	0.00399959	0.0065385	0.0232632	28.3148	31.4366	35.1976	13.9732	13.715	30.7782	0.925774		3.54568
PS(40:7)	0	0.000623854	0.00178985	0.00574334	0.0138987	0.0333882	0	0.000875608	0.00246433	0.000345415	0.00289007	0.00357305		140.355	137.683	6.01418	20.7938	10.7015	0.98481		0
PS(40:6)	0.0419554	0.107167	0.248009	0.372708	0.700159	1.36809	0.0080074	0.0200517	0.0622212	0.0729521	0.089595	0.0592003	19.0855	18.7108	25.0883	19.5735	12.7964	4.32721	0.992213		41.9554
PS(40:5)	0.00147866	0.00366975	0.00890391	0.0187844	0.0399833	0.109574	0.000210264	0.00261778	0.00362072	0.00242094	0.00642744	0.0162267	14.2199	71.334	40.6643	12.888	16.0753	14.8089	0.977334		1.47866
PS	0.210741	0.485551	1.10642	1.69668	3.19171	6.82249	0.0475321	0.0468044	0.219965	0.348977	0.231833	0.331256	22.5547	9.63944	19.8809	20.5682	7.2636	4.85536	0.994279		210.741
																					0
PG(32:1)	0	0.000196592	0.000458189	0.000901776	0.00198151	0.00340175	0	5.83305e-05	0.000131258	0.000115733	0.000438647	0.000807548		29.6709	28.6471	12.8339	22.137	23.7392	0.959169		0
PG(32:0)	0.00141261	0.00368829	0.00674859	0.00989553	0.0253341	0.0416708	0.000375727	0.000410276	0.00212908	0.000579733	0.00384504	0.0103547	26.5982	11.1237	31.5485	5.85854	15.1774	24.8488	0.956673		1412.61
PG(34:2)	0.0014289	0.0028861	0.00654686	0.00830916	0.0182435	0.0387142	0.000314323	0.000636253	0.00227847	0.00161034	0.000972164	0.00531458	21.9976	22.0454	34.8024	19.3802	5.32882	13.7277	0.983205		1428.9
PG(34:1)	0.0058494	0.0120396	0.0263616	0.0480419	0.0849601	0.19127	0.00155419	0.00179763	0.00634807	0.0137556	0.0109057	0.0131935	26.5701	14.931	24.0808	28.6324	12.8363	6.89781	0.989898		5849.4
PG(34:0)	0.000178778	0.00035599	0.00131188	0.00181518	0.0039386	0.0111518	8.30449e-05	0.000131232	0.000196548	0.000378312	0.000895635	0.00240588	46.4513	36.8641	14.9822	20.8416	22.7399	21.5739	0.960078		178.778
PG(36:4)	0.000520532	0.000967838	0.00185744	0.00292374	0.00770511	0.0185944	0.000236519	7.88205e-05	0.00077428	0.000485143	0.0011597	0.00262419	45.4379	8.14397	41.6853	16.5933	15.051	14.1128	0.979876		520.532
PG(36:2)	0.000571286	0.000854235	0.00350182	0.00604563	0.0116151	0.0236779	0.000457818	0.000383461	0.00110597	0.00119103	0.00696716	0.00203001	80.1383	44.8895	31.5826	19.7007	59.9836	8.57346	0.949346		571.286
PG(38:6)	8.106e-05	0.000506044	0.00193033	0.00331901	0.0070063	0.0165544	0.00016212	0.000351925	0.000496092	0.000456034	0.00057289	0.00402125	200	69.5444	25.6999	13.7401	8.17678	24.2911	0.9659		81.06
PG(38:4)	0	0.000479709	0.00124144	0.00141189	0.00341556	0.00738511	0	8.09019e-05	0.000182876	0.000164122	0.000395823	0.00122868		16.8648	14.731	11.6242	11.5888	16.6373	0.978453		0
PG(38:3)	0	3.12054e-05	0.000184937	0.000292763	0.00102987	0.00295601	0	4.37982e-05	0.000133064	0.000289802	0.00042123	0.0003559		140.355	71.951	98.9885	40.9011	12.0399	0.964862		0
PG(40:8)	0.000194138	0.0010728	0.00260523	0.00419344	0.0089304	0.01765	0.000234801	0.000190012	0.000587754	0.000808814	0.00335199	0.00356671	120.945	17.7118	22.5606	19.2876	37.5345	20.208	0.958548		194.138
PG(40:7)	0	0.000177633	0.001034	0.00156377	0.00365933	0.0107171	0	0.000121922	0.000406535	0.000291055	0.000927156	0.00128648		68.6374	39.3169	18.6123	25.3368	12.004	0.975805		0
PG(40:6)	0	0.000178843	0.000852653	0.00153275	0.00261139	0.00599236	0	0.000135067	0.000278783	0.000259947	0.000240755	0.00073968		75.5223	32.696	16.9596	9.21945	12.3437	0.985389		0
PG(44:12)	0.000457617	0.00201128	0.00424516	0.00824818	0.0154748	0.034776	0.000139825	0.000336043	0.0015971	0.00160933	0.00379207	0.00710119	30.5549	16.7079	37.6217	19.5114	24.5048	20.4198	0.968302		457.617
PG*	0.0106943	0.0254462	0.0588801	0.0984947	0.195906	0.424512	0.00278131	0.00253482	0.011998	0.0216559	0.0231058	0.0388634	26.0074	9.96148	20.377	21.9869	11.7944	9.15484	0.990758		10694.3
																					0
PA(34:2)	0.00106849	0.00266828	0.00528268	0.00610579	0.0138362	0.0195725	0.000268395	0.000350415	0.00101497	0.000533146	0.00260988	0.00357904	25.1192	13.1326	19.2132	8.73181	18.8627	18.2861	0.948851		1.06849
PA(34:1)	0.000471855	0.00184268	0.00296093	0.00270132	0.00706296	0.0117492	0.000545248	0.000394674	0.000214519	0.000325681	0.00142196	0.00105956	115.554	21.4184	7.24498	12.0564	20.1326	9.0181	0.970513		0.471855
PA(36:4)	0	0.00155157	0.00312665	0.00317036	0.00711846	0.015124	0	0.000271519	0.00034077	0.000401498	0.000316322	0.00258776		17.4997	10.8989	12.6641	4.44369	17.1103	0.974361		0
PA(36:3)	0.000238138	0.000873385	0.00224285	0.00155852	0.0028387	0.00511512	0.000321633	0.000229558	0.000415179	0.000341262	0.000692236	0.000991223	135.061	26.2837	18.5112	21.8966	24.3857	19.3783	0.908715		0.238138
PA(36:2)	0.000646595	0.0015099	0.00374356	0.00336868	0.00653736	0.0105087	0.000355721	0.000695467	0.000196991	0.000854404	0.00123459	0.000581857	55.0145	46.0603	5.26213	25.3632	18.8852	5.53689	0.959111		0.646595
PA	0.00242508	0.00844582	0.0173567	0.0169047	0.0373936	0.0620696	0.00130339	0.00179587	0.00108504	0.00228241	0.00573143	0.00669788	53.7462	21.2634	6.25142	13.5016	15.3273	10.7909	0.973441		2.42508
																					0
CL(70:8)	0.000207713	0.00168553	0.00387348	0.00630944	0.00904894	0.0176481	0.000243917	0.000309577	0.000154411	0.000934637	0.00168935	0.00407857	117.43	18.3668	3.98636	14.8133	18.669	23.1105	0.954436		0.207713
CL(70:7)	0.00330016	0.00659387	0.0160488	0.0254195	0.0405414	0.0994874	0.000323635	0.0012685	0.00192772	0.00483498	0.00262261	0.00338437	9.80664	19.2376	12.0116	19.0207	6.46898	3.4018	0.990544		3.30016
CL(70:6)	0.0035387	0.0106367	0.0204948	0.0291126	0.056558	0.105611	0.00112397	0.00170057	0.00324442	0.00170017	0.00844576	0.0162798	31.7621	15.9878	15.8304	5.84	14.9329	15.4149	0.980125		3.5387
CL(70:5)	0.00254457	0.0065493	0.0132719	0.0198697	0.0365694	0.0873144	0.000316628	0.000845433	0.00320936	0.00405731	0.00349842	0.0144509	12.4433	12.9087	24.1817	20.4195	9.56653	16.5504	0.976788		2.54457
CL(70:4)	0.00139873	0.00350612	0.00849206	0.0121632	0.0228231	0.0355997	0.000254968	0.000818985	0.00176657	0.00193927	0.00186624	0.00528447	18.2286	23.3587	20.8027	15.9437	8.17695	14.8441	0.970794		1.39873
CL(72:9)	0.00248473	0.00422375	0.00998693	0.0150004	0.0251932	0.0601334	0.000729071	0.00104206	0.00326371	0.00386368	0.00120392	0.00708847	29.3421	24.6714	32.6799	25.7571	4.77875	11.7879	0.98187		2.48473
CL(72:8)	0.0400731	0.0961282	0.186993	0.299573	0.539751	1.29184	0.0100905	0.020347	0.0326674	0.0976509	0.0702166	0.115484	25.1802	21.1665	17.4698	32.5967	13.0091	8.93953	0.985315		40.0731
CL(74:11)	0.00104854	0.00255457	0.00602478	0.00988216	0.0155383	0.0256729	0.000455557	0.000253486	0.00129515	0.00139586	0.00130918	0.00360252	43.4468	9.92285	21.497	14.125	8.42554	14.0324	0.972272		1.04854
CL(74:10)	0.00732793	0.0186128	0.0406657	0.0575684	0.108271	0.196084	0.00148953	0.00362542	0.0106944	0.0113699	0.00532894	0.0383664	20.3267	19.478	26.2984	19.7502	4.92185	19.5663	0.971539		7.32793
CL(74:9)	0.00696172	0.0132512	0.031052	0.0522453	0.116138	0.256931	0.00219508	0.00196267	0.00621233	0.0100317	0.033589	0.0239595	31.5307	14.8113	20.0062	19.2011	28.9215	9.32525	0.983347		6.96172
CL(74:8)	0.00395629	0.00727905	0.0181421	0.0303788	0.0752848	0.203879	0.00122267	0.00167521	0.00508397	0.0100681	0.0324004	0.0252166	30.9044	23.0141	28.023	33.142	43.0372	12.3684	0.968035		3.95629
CL(74:7)	0.000816307	0.00333403	0.00726492	0.0126255	0.0217023	0.0595411	0.000241157	0.000306271	0.0016502	0.00157801	0.006646	0.0108788	29.5424	9.18619	22.7147	12.4986	30.6235	18.2711	0.965086		0.816307
CL(76:12)	0.00948929	0.0197942	0.0517547	0.0781353	0.138716	0.273188	0.00113767	0.00460272	0.00746675	0.0163425	0.0143639	0.0499844	11.989	23.2529	14.4272	20.9156	10.3549	18.2967	0.97535		9.48929
CL	0.0831477	0.194149	0.414066	0.648283	1.20614	2.71293	0.014663	0.0335285	0.0651682	0.163132	0.146358	0.293483	17.6348	17.2694	15.7386	25.1637	12.1344	10.8179	0.986723		83.1477
																					0
SM(34:1:2)	0.17888	0.460693	0.919516	1.47923	2.63051	5.71444	0.0422033	0.0549994	0.24613	0.292114	0.366409	0.804131	23.5931	11.9384	26.7674	19.7477	13.9292	14.0719	0.981977		178.88
SM(36:1:2)	0.00229031	0.00764032	0.0106323	0.0303799	0.0368637	0.0827196	0.000352561	0.00126358	0.00335013	0.00502797	0.0176293	0.00464047	15.3936	16.5384	31.5091	16.5503	47.8229	5.60988	0.958802		2.29031
SM(38:1:2)	0.00624845	0.012501	0.0275133	0.0455869	0.0719686	0.133194	0.00233133	0.00225236	0.0124617	0.00576026	0.00467845	0.00983763	37.3105	18.0175	45.2934	12.6358	6.50069	7.38593	0.985386		6.24845
SM(40:2:2)	0.00405956	0.0115881	0.0239328	0.039623	0.0902889	0.188285	0.000803891	0.00217412	0.00388565	0.00872757	0.0185787	0.0132994	19.8024	18.7616	16.2357	22.0265	20.577	7.06343	0.989762		4.05956
SM(40:1:2)	0.0154642	0.0342217	0.0656331	0.119829	0.209515	0.476922	0.00609436	0.00342633	0.0256627	0.0222028	0.0136608	0.05314	39.4095	10.0122	39.1002	18.5288	6.52024	11.1423	0.987114		15.4642
SM(41:2:2)	0.000779392	0.00406955	0.00938383	0.0141055	0.035123	0.0834637	0.000550532	0.000768633	0.00233474	0.00286846	0.0082751	0.0103291	70.6361	18.8874	24.8805	20.3357	23.5603	12.3756	0.981333		0.779392
SM(41:1:2)	0.00583585	0.0112977	0.0271143	0.0423394	0.0698846	0.162058	0.00212121	0.0016021	0.00804981	0.00898423	0.00520388	0.0205381	36.348	14.1808	29.6884	21.2195	7.44638	12.6733	0.982456		5.83585
SM(42:2:2)	0.0224231	0.0603326	0.14917	0.205524	0.431015	0.965004	0.00702712	0.00562059	0.0395317	0.0412792	0.0749176	0.0491303	31.3387	9.31601	26.5011	20.0849	17.3817	5.0912	0.990119		22.4231
SM(42:1:2)	0.026155	0.0430408	0.0915822	0.137751	0.281786	0.730139	0.00411513	0.00630231	0.0209362	0.0241582	0.0459466	0.0427892	15.7336	14.6426	22.8605	17.5376	16.3055	5.86042	0.986216		26.155
SM	0.262136	0.645384	1.32448	2.11437	3.85695	8.53622	0.0612182	0.0760492	0.300576	0.400844	0.394641	0.848153	23.3536	11.7835	22.6939	18.9581	10.2319	9.93593	0.988966		262.136
																					0
Cer(34:1:2)	0.00441401	0.0107314	0.0228494	0.0324172	0.0605572	0.123703	0.000591038	0.00147299	0.00379749	0.00519066	0.00994632	0.0158065	13.39	13.7259	16.6196	16.0121	16.4247	12.7778	0.983619		4.41401
Cer(40:2:2)	0.000244029	0.00082546	0.00161214	0.00290582	0.00821528	0.0212426	4.88429e-05	0.000106025	0.000412904	0.00060435	0.00178505	0.00224274	20.0152	12.8444	25.6122	20.7979	21.7284	10.5578	0.9819		0.244029
Cer(40:1:2)	0.000720064	0.00165185	0.0046173	0.00374631	0.0108039	0.0276965	0.000154017	0.000495015	0.000944543	0.000754131	0.00217078	0.00230603	21.3893	29.9673	20.4566	20.13	20.0925	8.32608	0.976398		0.720064
Cer(41:1:2)	0.000146709	0.00106942	0.00237977	0.00222872	0.00668687	0.011823	0.000169455	0.000447845	0.000937736	0.000502018	0.00278536	0.00112615	115.504	41.8772	39.4044	22.525	41.6542	9.52509	0.952842		0.146709
Cer(42:2:2)	0.00281574	0.00598844	0.0119197	0.0195782	0.0455905	0.0957658	0.000339284	0.000700434	0.00253684	0.0036152	0.0044485	0.00735176	12.0495	11.6964	21.2828	18.4654	9.75752	7.67681	0.993176		2.81574
Cer(42:1:2)	0.00175869	0.00386415	0.00677725	0.00913335	0.0261395	0.0609996	4.82012e-05	0.00104802	0.00161554	0.0018167	0.00576335	0.00677502	2.74075	27.1215	23.8378	19.8908	22.0484	11.1067	0.980932		1.75869
Cer	0.0100992	0.0241307	0.0501556	0.0700097	0.157993	0.34123	0.000897277	0.00340961	0.00840078	0.0124135	0.0206416	0.0265918	8.8846	14.1297	16.7494	17.7311	13.0649	7.79291	0.99103		10.0992
																					-13
Class
LPC	0.0584688	0.132487	0.274506	0.427478	0.694367	1.56007	0.0193038	0.0303769	0.034545	0.0669379	0.0515611	0.172644	33.0156	22.9282	12.5844	15.6588	7.42563	11.0664	0.986591
PC	0.993694	2.21269	4.80838	7.30538	13.8644	28.1695	0.210247	0.23484	0.823751	1.14576	0.808166	2.05205	21.1581	10.6133	17.1316	15.6838	5.82906	7.28465	0.994
PC-O*	0.301655	0.701313	1.41555	2.12797	4.80099	10.184	0.0480543	0.0973032	0.412252	0.300188	0.52677	2.1277	15.9302	13.8744	29.1232	14.1068	10.9721	20.8925	0.972347
LPE	0.0187639	0.0422094	0.0901848	0.12721	0.184772	0.388074	0.00541119	0.00798229	0.0152939	0.0204348	0.0152771	0.0716745	28.8383	18.9112	16.9584	16.0639	8.26809	18.4693	0.968533
PE	0.522745	1.11858	2.44005	3.66097	7.41078	15.9793	0.114154	0.149977	0.420312	0.631916	0.468971	0.865189	21.8374	13.4078	17.2255	17.2609	6.32823	5.41443	0.994819
PE-P*	0.0648718	0.147884	0.320382	0.521851	0.801946	1.64348	0.0238127	0.015237	0.084446	0.0874761	0.0970295	0.221058	36.7073	10.3034	26.3579	16.7626	12.0993	13.4506	0.980473
LPI	0.0140667	0.0292074	0.0532252	0.0692053	0.146749	0.306501	0.00254579	0.00545304	0.0113422	0.0117624	0.00630454	0.0512425	18.098	18.67	21.3099	16.9963	4.29614	16.7185	0.979447
PI	0.213148	0.493513	1.03971	1.53257	2.9383	6.21957	0.0400783	0.0634221	0.173504	0.238535	0.18718	0.414271	18.803	12.8511	16.6877	15.5644	6.37037	6.66076	0.993912
LPS	0.00398106	0.010458	0.0226592	0.034338	0.0532236	0.0857043	0.00109243	0.00113837	0.00535072	0.00775563	0.00524807	0.0177471	27.4407	10.8852	23.6139	22.5861	9.86041	20.7074	0.951894
PS	0.210741	0.485551	1.10642	1.69668	3.19171	6.82249	0.0475321	0.0468044	0.219965	0.348977	0.231833	0.331256	22.5547	9.63944	19.8809	20.5682	7.2636	4.85536	0.994279
PG/BMP*	0.0106943	0.0254462	0.0588801	0.0984947	0.195906	0.424512	0.00278131	0.00253482	0.011998	0.0216559	0.0231058	0.0388634	26.0074	9.96148	20.377	21.9869	11.7944	9.15484	0.990758
PA	0.00242508	0.00844582	0.0173567	0.0169047	0.0373936	0.0620696	0.00130339	0.00179587	0.00108504	0.00228241	0.00573143	0.00669788	53.7462	21.2634	6.25142	13.5016	15.3273	10.7909	0.973441
CL	0.0831477	0.194149	0.414066	0.648283	1.20614	2.71293	0.014663	0.0335285	0.0651682	0.163132	0.146358	0.293483	17.6348	17.2694	15.7386	25.1637	12.1344	10.8179	0.986723
SM	0.262136	0.645384	1.32448	2.11437	3.85695	8.53622	0.0612182	0.0760492	0.300576	0.400844	0.394641	0.848153	23.3536	11.7835	22.6939	18.9581	10.2319	9.93593	0.988966
Cer	0.0100992	0.0241307	0.0501556	0.0700097	0.157993	0.34123	0.000897277	0.00340961	0.00840078	0.0124135	0.0206416	0.0265918	8.8846	14.1297	16.7494	17.7311	13.0649	7.79291	0.99103
Membrane lipid	2.77064	6.27145	13.436	20.4517	39.5416	83.4357	0.554085	0.750528	2.38759	3.43938	2.36992	6.74287	19.9984	11.9674	17.7701	16.8171	5.99348	8.08152	0.993034
Nr of quantifiable species	110	125.25	126.5	127.75	128	128	4.69042	2.62996	1.73205	0.5	0	0
Data represent mean ± SD (n = 4). CV%, coefficient of variation, calculated as SD/Mean x 100; green fill indicates CV% < 30. R2, regression coefficient; orange fill indicate R2 > 0.9.
LMD, laser microdissection.
PC and PC-O, diacyl and alkyl-acyl phosphatidylcholine; PE and PE-P, diacyl and alkenyl-acyl phosphatidylethanolamine; PI, phosphatidylinositol; PS, phosphatidylserine; PG, phosphatidylglycerol; BMP, bis(monoacylglycero)phosphate; PA, phosphatidic acid; CL, cardiolipin; LPC, LPE, LPI, and LPS, the corresponding lysolipids;
SM, sphingomyelin; and Cer, ceramide.
Membrane lipids were calculated as the sum of glycerophospho- and sphingolipids, i.e., all quantified lipid species.
Sum formulas for glycero(phospho)lipids are defined as the lipid class abbreviation followed by the total number of carbons and total number of double bonds for all chains, e.g. PC(34:1).
Sum formulas for sphingolipids are defined as the lipid class abbreviation followed by the total number of carbons, total number of double bonds and total number of hydroxyl groups in the long chain base and the fatty acyl moiety, e.g. Cer(34:1:2).
* PC/PE-O(x:y), alkyl-acyl and PC/PE-P(x:y-1), alkenyl-acyl species as well as PG and BMP species are isomeric and therefore could not be resolved by the applied shotgun strategy.
For simplicity, for PC/PE, we indicated the more likely annotation based on literature data and our previous works, whereas for PG/BMP, PG or LPG was used in the species list.

## Sheet: S4 Kidney_mol%
Table S4. Compositional data for the mouse kidney lipidome
	mol% of membrane lipids
LMD area (x1000 µm2)	5	10	20	40	80	160	5	10	20	40	80	160	5	10	20	40	80	160
Lipid species	mean						SD						CV%
LPC(16:0)	0.626255	0.653543	0.580739	0.608495	0.54735	0.611943	0.0949821	0.0565649	0.126071	0.0434389	0.0771167	0.0953972	15.1667	8.65511	21.7088	7.13875	14.0891	15.5892
LPC(18:2)	0.212916	0.231877	0.267558	0.256062	0.172865	0.18353	0.0326319	0.0403268	0.041346	0.0158714	0.0152181	0.0255354	15.3262	17.3915	15.4531	6.19825	8.80346	13.9135
LPC(18:1)	0.195384	0.162981	0.150111	0.137079	0.116292	0.107401	0.0388784	0.0259207	0.0311676	0.00367212	0.03318	0.015376	19.8984	15.9041	20.7631	2.67884	28.5317	14.3164
LPC(18:0)	0.400206	0.32606	0.359054	0.348885	0.307046	0.336946	0.0671666	0.00631645	0.0589792	0.00656323	0.0436117	0.0422697	16.783	1.9372	16.4263	1.8812	14.2036	12.5449
LPC(20:4)	0.160344	0.196513	0.187796	0.194375	0.12739	0.17018	0.0700753	0.0608402	0.0241622	0.00908339	0.0223817	0.0143536	43.703	30.9598	12.8662	4.67313	17.5695	8.43439
LPC(20:3)	0	0.0161951	0.0206839	0.0283159	0.0214255	0.0260709	0	0.00593561	0.00321066	0.00422617	0.00316933	0.00258118		36.6506	15.5225	14.925	14.7923	9.90061
LPC(22:6)	0.478272	0.505526	0.496486	0.520184	0.470567	0.440355	0.0755482	0.0810338	0.089518	0.0109168	0.0136205	0.0341277	15.7961	16.0296	18.0303	2.09864	2.89448	7.75004
LPC	2.07338	2.0927	2.06243	2.0934	1.76294	1.87643	0.309691	0.265468	0.168279	0.0478906	0.191876	0.221666	14.9366	12.6854	8.15928	2.2877	10.8839	11.8132
PC(32:0)	3.71894	4.02104	3.28025	3.26599	4.33014	4.46622	1.0958	0.346194	0.338487	0.358743	0.262813	0.241313	29.4655	8.60955	10.319	10.9842	6.06939	5.40307
PC(34:3)	0.103081	0.145913	0.15709	0.168377	0.141328	0.131477	0.0251368	0.0374451	0.0149669	0.012969	0.0109897	0.0195909	24.3855	25.6626	9.52759	7.70236	7.77598	14.9006
PC(34:2)	4.57092	4.31702	4.38043	4.26655	4.25434	3.97306	0.171973	0.194661	0.204142	0.23798	0.247863	0.334653	3.76232	4.50916	4.66033	5.57781	5.82612	8.42306
PC(34:1)	2.53265	2.48063	2.50081	2.44006	2.20967	2.07416	0.301091	0.130758	0.395533	0.0670507	0.155109	0.10534	11.8884	5.27115	15.8162	2.74791	7.01956	5.07866
PC(34:0)	0.237615	0.248499	0.222194	0.224436	0.241906	0.258498	0.0867979	0.00583357	0.0273342	0.0143615	0.0146006	0.0409939	36.5289	2.34752	12.3019	6.39892	6.03564	15.8585
PC(36:5)	0.0520168	0.130181	0.128419	0.145015	0.123843	0.12502	0.0386857	0.00528537	0.017917	0.00804276	0.0134396	0.0173342	74.3714	4.06002	13.952	5.54614	10.8522	13.8651
PC(36:4)	3.18266	2.88451	2.93047	3.26862	2.94314	2.94414	0.386014	0.119304	0.634853	0.0596864	0.275914	0.190869	12.1287	4.13603	21.6638	1.82605	9.37483	6.48301
PC(36:3)	1.20545	1.06079	1.10048	1.06568	1.04252	1.09046	0.112596	0.0686837	0.0645951	0.0605791	0.0305524	0.0614637	9.34056	6.4748	5.8697	5.68456	2.93063	5.63649
PC(36:2)	2.54305	2.52768	2.85108	2.87956	2.33305	2.12892	0.488438	0.232088	0.110219	0.206973	0.0833967	0.0725782	19.2068	9.18183	3.86585	7.18767	3.57458	3.40915
PC(36:1)	0.710494	0.548852	0.617178	0.5693	0.457807	0.416673	0.28535	0.0789656	0.150612	0.0406371	0.062299	0.0424409	40.1622	14.3874	24.4033	7.13809	13.6081	10.1857
PC(38:7)	0.0273873	0.142116	0.134624	0.163144	0.151997	0.132241	0.0317457	0.00485245	0.0312158	0.00429671	0.00891875	0.0089502	115.914	3.41443	23.1874	2.63369	5.8677	6.76807
PC(38:6)	9.89437	9.95842	10.2633	9.60507	10.1964	9.32972	0.642476	0.421827	0.609762	0.407111	0.40548	0.414181	6.49335	4.23589	5.94119	4.2385	3.97671	4.43937
PC(38:5)	0.814816	0.690221	0.699421	0.774524	0.590172	0.857219	0.192433	0.0589894	0.22272	0.0337636	0.145773	0.0785654	23.6167	8.54644	31.8435	4.35928	24.7001	9.16516
PC(38:4)	2.44685	2.15999	2.25921	2.46872	1.97013	2.01419	0.618567	0.240913	0.572522	0.100394	0.183204	0.137295	25.2801	11.1535	25.3418	4.06666	9.29906	6.81637
PC(38:3)	0.33609	0.387246	0.438884	0.436479	0.359138	0.288633	0.109733	0.0455086	0.0255844	0.0465093	0.0287846	0.0216889	32.6498	11.7519	5.82942	10.6556	8.01492	7.51432
PC(38:2)	0.0127396	0.0451264	0.0396734	0.070081	0.0551641	0.0442432	0.0254791	0.0321344	0.0331859	0.00882457	0.00972744	0.0140969	200	71.2097	83.6477	12.592	17.6336	31.8622
PC(40:8)	0.188042	0.226395	0.212998	0.213706	0.240542	0.25782	0.0942292	0.00966201	0.018897	0.0142116	0.00982712	0.0177458	50.1106	4.26776	8.87192	6.6501	4.0854	6.88302
PC(40:7)	0.395457	0.403493	0.416762	0.444323	0.461898	0.413995	0.0970342	0.0202096	0.038074	0.0246345	0.0199491	0.0364049	24.5373	5.00865	9.13569	5.54427	4.31893	8.79355
PC(40:6)	2.75661	2.79481	3.06511	3.14146	2.76472	2.53552	0.217099	0.133565	0.236757	0.105432	0.234665	0.367366	7.87557	4.77905	7.72426	3.35614	8.48782	14.4888
PC(40:5)	0.0795177	0.157573	0.134694	0.161425	0.200351	0.299773	0.0938576	0.0276262	0.0418598	0.0112593	0.028253	0.0259135	118.034	17.5323	31.0776	6.97493	14.1018	8.64438
PC	35.8088	35.3305	35.8331	35.7725	35.0682	33.782	1.30984	0.573055	1.15946	0.500231	0.434969	0.631365	3.65787	1.62198	3.23573	1.39837	1.24035	1.86894
PC-O(32:1)	0.0100505	0.0561109	0.0415818	0.0384062	0.0526449	0.0615599	0.0201011	0.0178673	0.0221617	0.00711706	0.00725835	0.00679358	200	31.8429	53.2966	18.531	13.7874	11.0357
PC-O(32:0)	0.927656	0.500706	0.319761	0.308949	0.42731	0.526961	0.166974	0.0401832	0.120189	0.0300877	0.0547227	0.0233941	17.9996	8.02532	37.5873	9.73874	12.8063	4.43944
PC-O(34:2)	0.278189	0.280967	0.302808	0.240053	0.272705	0.231705	0.0529782	0.0145013	0.114682	0.0049481	0.0219626	0.0219192	19.0439	5.16123	37.8728	2.06126	8.0536	9.45998
PC-O(34:1)	0.316735	0.380297	0.375129	0.303504	0.378784	0.292434	0.0824093	0.048287	0.120073	0.0273705	0.0421929	0.0527959	26.0184	12.6972	32.0085	9.01814	11.139	18.0539
PC-O(36:4)	0.388258	0.338388	0.336291	0.321721	0.403004	0.470381	0.0893648	0.0232844	0.079741	0.0280547	0.0323028	0.036271	23.0169	6.88099	23.7119	8.7202	8.01549	7.71099
PC-O(38:6)	9.1714	9.61398	9.08672	9.23051	10.585	10.5417	2.01868	0.501091	1.5221	0.312755	0.632654	1.5988	22.0106	5.21211	16.7508	3.38828	5.97689	15.1664
PC-O*	11.0923	11.1704	10.4623	10.4431	12.1194	12.1247	2.2045	0.58895	1.80155	0.361128	0.709493	1.71234	19.8742	5.27239	17.2195	3.45804	5.85417	14.1228
LPE(16:0)	0.0571334	0.0514148	0.0469854	0.0409659	0.0353941	0.0352852	0.0176996	0.00537435	0.00685548	0.00177283	0.0052789	0.00619311	30.9794	10.4529	14.5906	4.32757	14.9146	17.5516
LPE(18:2)	0.0251605	0.0350874	0.0380572	0.0253555	0.0191607	0.0196972	0.0188101	0.002175	0.0101875	0.00173897	0.00340357	0.00376425	74.7604	6.19882	26.769	6.85835	17.7633	19.1106
LPE(18:1)	0.089544	0.0988269	0.0716094	0.0631632	0.0486017	0.0495084	0.00996431	0.00531503	0.0118843	0.00359561	0.00921784	0.00996444	11.1278	5.37812	16.596	5.69257	18.9661	20.1268
LPE(18:0)	0.280899	0.233144	0.231468	0.204996	0.182232	0.175402	0.0503519	0.0210356	0.0219742	0.0121279	0.0242116	0.0243965	17.9253	9.02258	9.49344	5.91618	13.2862	13.9089
LPE(20:4)	0.21819	0.249966	0.284664	0.288234	0.185003	0.185332	0.0266699	0.0263641	0.019189	0.0127363	0.034402	0.0340656	12.2232	10.5471	6.74093	4.41872	18.5954	18.3809
LPE	0.670927	0.66844	0.672784	0.622715	0.470391	0.465225	0.112053	0.0558036	0.0364842	0.00978437	0.0691089	0.0769612	16.7013	8.34833	5.42287	1.57124	14.6918	16.5428
PE(34:2)	0.248904	0.196686	0.221753	0.177392	0.217808	0.220948	0.0462205	0.0228659	0.0332034	0.020173	0.0161254	0.014139	18.5696	11.6256	14.9732	11.372	7.40349	6.39926
PE(34:1)	0.216881	0.163585	0.179481	0.157339	0.142401	0.150283	0.0772278	0.0143519	0.0570648	0.00869562	0.0151352	0.00543868	35.6084	8.77338	31.7943	5.52667	10.6286	3.61896
PE(36:4)	1.95266	1.76425	1.82752	1.74079	1.87461	1.89267	0.225331	0.0491947	0.264827	0.114028	0.123982	0.221257	11.5397	2.78841	14.4911	6.55037	6.61379	11.6902
PE(36:3)	0.292927	0.223903	0.234181	0.21969	0.250759	0.34131	0.0618449	0.0221679	0.0402114	0.0109541	0.0196603	0.0498622	21.1128	9.90065	17.1711	4.98617	7.84031	14.6091
PE(36:2)	0.97393	0.816378	0.862289	0.832295	0.750802	0.763702	0.140851	0.0266546	0.0630557	0.0196929	0.0368309	0.0768891	14.4622	3.26499	7.31259	2.3661	4.90554	10.068
PE(36:1)	0.187217	0.123212	0.208809	0.127245	0.114452	0.12156	0.170585	0.0117394	0.167534	0.00708296	0.00991503	0.00629049	91.1162	9.5278	80.233	5.56641	8.66304	5.17482
PE(38:7)	0	0.061967	0.0261589	0.0168105	0.0567825	0.0840003	0	0.0209226	0.0132224	0.0142333	0.00717861	0.0112487		33.764	50.5464	84.6695	12.6423	13.3912
PE(38:6)	1.10938	1.10475	1.01208	0.998218	1.27955	1.40852	0.245274	0.0430769	0.0634988	0.0494007	0.132404	0.160719	22.109	3.89926	6.27409	4.94889	10.3477	11.4105
PE(38:5)	1.86128	1.51344	1.65528	1.86163	1.39332	1.77137	0.300432	0.137631	0.586325	0.155879	0.215179	0.088797	16.1411	9.09397	35.4215	8.37323	15.4437	5.0129
PE(38:4)	9.20908	8.97186	9.18021	9.04442	9.42108	9.31026	0.481872	0.254497	0.319358	0.0973307	0.0844053	0.370793	5.23258	2.83661	3.47876	1.07614	0.89592	3.98262
PE(38:2)	0.0244953	0.0528713	0.0667554	0.0611712	0.0484185	0.0405918	0.0489906	0.00684482	0.010195	0.00506195	0.00667844	0.00293993	200	12.9462	15.2721	8.27505	13.7932	7.24266
PE(40:7)	0.809718	0.779811	0.699299	0.70096	1.03654	0.938357	0.434516	0.114114	0.0908721	0.0718061	0.144026	0.0338253	53.6626	14.6336	12.9947	10.244	13.8948	3.60473
PE(40:6)	1.80054	1.91607	1.87117	1.80938	2.02354	1.99864	0.337405	0.0862829	0.241513	0.0569125	0.0831839	0.0612545	18.7391	4.50311	12.9071	3.14542	4.11081	3.06482
PE(40:5)	0.143302	0.122773	0.133073	0.1468	0.13283	0.15086	0.0381448	0.017186	0.028465	0.0043251	0.0118041	0.0151652	26.6186	13.9982	21.3905	2.94626	8.88665	10.0525
PE	18.8303	17.8116	18.1781	17.8941	18.7429	19.1931	0.789238	0.320852	0.342261	0.286829	0.4485	0.855487	4.19131	1.80137	1.88282	1.60292	2.39291	4.45727
PE-P(36:4)	1.41723	1.49771	1.45588	1.62019	1.30348	1.15941	0.308458	0.191783	0.222393	0.139058	0.258733	0.165828	21.7649	12.8051	15.2755	8.58281	19.8494	14.3028
PE-P(38:4)	0.879271	0.87518	0.945398	0.935587	0.74106	0.804953	0.203203	0.12566	0.324826	0.0836672	0.122902	0.0909126	23.1104	14.3582	34.3586	8.94274	16.5846	11.2942
PE-P*	2.2965	2.37289	2.40127	2.55578	2.04454	1.96437	0.496979	0.255032	0.520748	0.149219	0.380526	0.127537	21.6408	10.7477	21.6863	5.83851	18.6118	6.49254
LPI(16:0)	0.0377262	0.0392857	0.0306097	0.0266056	0.0272966	0.0239618	0.00176669	0.00467341	0.00332117	0.00112372	0.00327495	0.00586251	4.68294	11.8959	10.8501	4.22361	11.9977	24.4661
LPI(18:1)	0.0870237	0.0743607	0.0421943	0.0330393	0.031472	0.0270484	0.0232191	0.00560816	0.0204802	0.00412007	0.00433337	0.00526842	26.6813	7.54184	48.5379	12.4702	13.769	19.4777
LPI(18:0)	0.281879	0.268678	0.244921	0.208939	0.241034	0.23553	0.0247562	0.0236992	0.0158759	0.0154612	0.0207609	0.0304058	8.78257	8.82069	6.48206	7.39985	8.61326	12.9095
LPI(20:4)	0.0626337	0.0499616	0.052777	0.047378	0.0480935	0.0569216	0.0177112	0.00326136	0.00189687	0.00165483	0.00384853	0.00603328	28.2774	6.52773	3.59412	3.49283	8.00219	10.5993
LPI(20:3)	0.042225	0.0303574	0.0240058	0.0228279	0.0243806	0.0237534	0.0166591	0.00592545	0.00247661	0.000717536	0.00258633	0.00631023	39.4531	19.519	10.3167	3.14324	10.6081	26.5656
LPI	0.511487	0.462643	0.394507	0.33879	0.372276	0.367215	0.0617806	0.0358487	0.0270696	0.0177624	0.0296055	0.0526332	12.0786	7.74867	6.86163	5.2429	7.95257	14.3331
PI(34:2)	0.161399	0.147353	0.145456	0.130498	0.129423	0.107252	0.0192458	0.00263632	0.0147292	0.00752667	0.0100901	0.00306227	11.9244	1.78912	10.1262	5.76767	7.79624	2.85522
PI(36:4)	0.410341	0.371734	0.344942	0.355858	0.345479	0.389558	0.0378178	0.0145925	0.0691427	0.0157696	0.02274	0.00969563	9.21619	3.92551	20.0447	4.43143	6.58216	2.48888
PI(36:3)	0.0976475	0.108589	0.100351	0.0958235	0.113993	0.110684	0.0367496	0.012851	0.0129074	0.00947944	0.00477122	0.00625676	37.635	11.8345	12.8622	9.89261	4.18554	5.65281
PI(36:2)	0.525313	0.506445	0.505031	0.473035	0.46223	0.476295	0.0566201	0.00685974	0.0315359	0.0193431	0.0564238	0.0140926	10.7783	1.35449	6.24436	4.08915	12.2069	2.95879
PI(36:1)	0.0358797	0.0323537	0.0432588	0.0407843	0.0351144	0.0285616	0.0546078	0.00585414	0.00992941	0.00664655	0.00360424	0.00136392	152.197	18.0942	22.9535	16.2969	10.2643	4.77538
PI(38:6)	0.640871	0.738711	0.689424	0.680336	0.652533	0.563998	0.0945406	0.0686586	0.0739335	0.0571207	0.075111	0.0851087	14.7519	9.29438	10.724	8.39595	11.5107	15.0903
PI(38:5)	0.156168	0.137592	0.128216	0.118206	0.134081	0.153021	0.0233991	0.00464798	0.0269111	0.0135708	0.00587803	0.00993535	14.9833	3.37808	20.9889	11.4807	4.38393	6.49281
PI(38:4)	3.34514	3.03914	3.11651	3.08922	3.20071	3.38988	0.302294	0.130853	0.337616	0.0962199	0.178892	0.26732	9.03681	4.3056	10.8332	3.1147	5.58914	7.88583
PI(40:6)	2.33283	2.78031	2.68018	2.52195	2.36195	2.24489	0.356633	0.159446	0.364483	0.122267	0.3234	0.092988	15.2876	5.73484	13.5992	4.84811	13.6921	4.14221
PI	7.70558	7.86223	7.75337	7.50571	7.43551	7.46414	0.0885441	0.0813262	0.206412	0.131094	0.328962	0.264199	1.14909	1.03439	2.66222	1.7466	4.4242	3.53958
LPS(18:0)	0.114057	0.127585	0.118843	0.104618	0.0828535	0.0555184	0.0104367	0.0080181	0.01389	0.00689039	0.0149409	0.00977056	9.15041	6.28454	11.6877	6.58624	18.0329	17.5988
LPS(20:4)	0.0283126	0.0359207	0.0440541	0.0400555	0.0344184	0.0335687	0.0118661	0.00396063	0.00791674	0.00396426	0.00376148	0.00574683	41.9111	11.026	17.9705	9.8969	10.9287	17.1196
LPS(22:6)	0	0.00346959	0.0057477	0.0222503	0.0179142	0.0133637	0	0.0048921	0.0066721	0.0027432	0.0010752	0.00266445		140.999	116.083	12.3288	6.00197	19.9379
LPS	0.14237	0.166975	0.168645	0.166924	0.135186	0.102451	0.018069	0.00475525	0.0220582	0.013108	0.0177477	0.0180808	12.6916	2.84788	13.0797	7.85268	13.1284	17.6483
PS(36:4)	0.388298	0.390746	0.393558	0.403413	0.477028	0.524301	0.0539921	0.0172793	0.0570249	0.016505	0.0780222	0.032644	13.9048	4.42212	14.4896	4.09134	16.3559	6.22618
PS(36:2)	0.631954	0.558611	0.554521	0.515811	0.475147	0.520743	0.121416	0.0581466	0.0701058	0.0342247	0.0553688	0.0639903	19.2128	10.4091	12.6426	6.63512	11.653	12.2883
PS(36:1)	0.447174	0.405964	0.410193	0.437042	0.335526	0.413705	0.136902	0.0745329	0.188777	0.0449845	0.0726138	0.0576976	30.615	18.3595	46.0215	10.2929	21.6418	13.9465
PS(38:6)	0.239263	0.305917	0.278104	0.263621	0.327191	0.359719	0.063156	0.0256243	0.0611928	0.0114355	0.037538	0.074484	26.3961	8.37621	22.0036	4.33788	11.4728	20.7061
PS(38:5)	0.102195	0.11411	0.133214	0.130058	0.115292	0.138776	0.0178807	0.00799216	0.0156433	0.00572289	0.00547201	0.0217962	17.4966	7.00391	11.743	4.40025	4.74622	15.7061
PS(38:4)	4.0636	4.08626	4.39174	4.42559	4.3175	4.33266	0.200868	0.26658	0.413946	0.310571	0.250349	0.143167	4.94311	6.52382	9.42557	7.01762	5.79846	3.30436
PS(38:3)	0.127331	0.127447	0.144864	0.141339	0.120538	0.0898791	0.0223365	0.0296586	0.0367996	0.0180649	0.0138631	0.023254	17.5421	23.2714	25.4028	12.7813	11.501	25.8726
PS(40:7)	0	0.00958181	0.0119379	0.0285407	0.0350189	0.0404313	0	0.0135103	0.0160183	0.00379618	0.00607685	0.00726515		140.999	134.181	13.301	17.353	17.9691
PS(40:6)	1.52932	1.70697	1.83319	1.81733	1.76551	1.64548	0.246034	0.229763	0.205861	0.0829801	0.129885	0.112394	16.0878	13.4603	11.2296	4.56605	7.3568	6.83047
PS(40:5)	0.0541224	0.0551885	0.0651681	0.0926559	0.100816	0.132314	0.007947	0.0391064	0.0192721	0.00954628	0.0120843	0.0249646	14.6834	70.8597	29.5729	10.3029	11.9865	18.8677
PS	7.58326	7.7608	8.21649	8.25539	8.06956	8.19802	0.365068	0.220063	0.349708	0.337316	0.262066	0.412696	4.81414	2.83557	4.25617	4.08601	3.24759	5.0341
PG(32:1)	0	0.00312733	0.00337885	0.00444016	0.00497452	0.00404988	0	0.000802983	0.000522333	0.000340894	0.000859665	0.000800763		25.6763	15.4589	7.67752	17.2814	19.7725
PG(32:0)	0.0509084	0.0590653	0.0496029	0.0491245	0.0640007	0.0494223	0.00835149	0.00528073	0.0088363	0.00609454	0.00793388	0.00917727	16.4049	8.94049	17.8141	12.4063	12.3965	18.5691
PG(34:2)	0.0514223	0.0459779	0.0481464	0.0405055	0.0462128	0.0462619	0.00191691	0.00760283	0.0123999	0.00129849	0.00270253	0.00302765	3.72779	16.5358	25.7546	3.2057	5.84801	6.54458
PG(34:1)	0.209194	0.193092	0.198124	0.231323	0.215566	0.229678	0.0132717	0.0278676	0.0421319	0.0286687	0.0307378	0.0127118	6.34421	14.4323	21.2654	12.3934	14.2591	5.53463
PG(34:0)	0.00636616	0.00556144	0.00987595	0.00887988	0.00994589	0.0132828	0.00259902	0.00154478	0.00130145	0.00114124	0.00206192	0.00214157	40.8256	27.7767	13.1779	12.852	20.7314	16.1229
PG(36:4)	0.0181263	0.0156977	0.0139904	0.0143151	0.0195131	0.0222708	0.00480887	0.00309535	0.00548377	0.000620872	0.00283745	0.00240328	26.5299	19.7185	39.1966	4.33719	14.5412	10.7911
PG(36:2)	0.019472	0.0143424	0.0260347	0.0294649	0.0296717	0.0286415	0.0154041	0.00843616	0.00662907	0.00143351	0.0180826	0.00467562	79.1092	58.8197	25.4625	4.86515	60.9424	16.3246
PG(38:6)	0.00333168	0.00842038	0.0144132	0.0162944	0.0177787	0.0196959	0.00666336	0.00595027	0.00271215	0.000564584	0.00192382	0.00380118	200	70.665	18.8171	3.4649	10.8209	19.2993
PG(38:4)	0	0.00778835	0.00943978	0.00695391	0.00861922	0.00882137	0	0.00187409	0.0018839	0.000439271	0.000569272	0.00102559		24.0628	19.957	6.3169	6.60468	11.6261
PG(38:3)	0	0.000479286	0.00126467	0.00130584	0.00257471	0.00356665	0	0.00067579	0.000903768	0.00116729	0.000979967	0.000585084		140.999	71.4626	89.3896	38.0613	16.4043
PG(40:8)	0.0075194	0.0170372	0.0193168	0.0204452	0.0225826	0.0211629	0.00883264	0.0016029	0.00228256	0.000651979	0.00821944	0.00392247	117.465	9.40825	11.8164	3.18891	36.3972	18.5347
PG(40:7)	0	0.00297164	0.00747563	0.00762968	0.00923885	0.0128942	0	0.00212106	0.00224549	0.000171924	0.00215394	0.00172159		71.3769	30.0375	2.25336	23.3139	13.3516
PG(40:6)	0	0.00268175	0.00624008	0.00751423	0.00663012	0.00719795	0	0.00199096	0.00111495	0.000559176	0.000836455	0.000858999		74.2412	17.8676	7.44157	12.616	11.9339
PG(44:12)	0.0164435	0.031927	0.0314971	0.0402747	0.0389605	0.0415672	0.00330616	0.00177439	0.00915108	0.00297668	0.00817986	0.0064832	20.1062	5.55765	29.0538	7.39094	20.9953	15.5969
PG*	0.382784	0.40817	0.4388	0.478471	0.49627	0.508513	0.0292456	0.040942	0.0520763	0.0264699	0.0588563	0.00938749	7.64024	10.0306	11.8679	5.53219	11.8597	1.84606
PA(34:2)	0.038955	0.042715	0.0401863	0.0302039	0.0349704	0.0233357	0.00988691	0.00456244	0.00983043	0.00297723	0.00594267	0.00300618	25.3804	10.6811	24.4622	9.85711	16.9934	12.8824
PA(34:1)	0.0150785	0.0291174	0.0224656	0.013293	0.0178506	0.0140748	0.0175643	0.00339099	0.00338049	0.000750382	0.00329145	0.000302644	116.486	11.6459	15.0474	5.64494	18.4389	2.15025
PA(36:4)	0	0.0246083	0.0235494	0.0156107	0.0180229	0.018096	0	0.00174457	0.0022328	0.00128698	0.000663887	0.00251491		7.08933	9.48136	8.24418	3.68357	13.8976
PA(36:3)	0.00723952	0.0137315	0.0174281	0.00762129	0.00711761	0.00614745	0.0092011	0.00227952	0.00582534	0.00132168	0.00137424	0.00117711	127.095	16.6007	33.4249	17.342	19.3076	19.148
PA(36:2)	0.0223046	0.0232869	0.028495	0.0162957	0.0165654	0.0126383	0.00756658	0.00919094	0.00481563	0.00160102	0.0031446	0.000934651	33.9238	39.4683	16.8999	9.82477	18.983	7.3954
PA	0.0835776	0.133459	0.132124	0.0830247	0.0945269	0.0742922	0.0316561	0.0142017	0.0231965	0.00360226	0.0127163	0.00344512	37.8763	10.6413	17.5566	4.33879	13.4526	4.63726
CL(70:8)	0.00830746	0.0267079	0.0294833	0.0309583	0.02287	0.0209502	0.0100429	0.00209522	0.00491561	0.00157334	0.00375598	0.00333473	120.89	7.84494	16.6725	5.08214	16.4232	15.9174
CL(70:7)	0.120927	0.105241	0.121892	0.124114	0.102655	0.119701	0.0130031	0.0154195	0.0218045	0.0105976	0.00620198	0.0083952	10.7529	14.6516	17.8884	8.53861	6.04158	7.01345
CL(70:6)	0.126871	0.169137	0.153745	0.144409	0.143128	0.125997	0.0221092	0.0126286	0.015455	0.0163474	0.0196251	0.00973918	17.4265	7.46647	10.0523	11.3202	13.7116	7.72971
CL(70:5)	0.0929083	0.104446	0.100569	0.0968471	0.0925595	0.1041	0.00864417	0.00567734	0.0252922	0.00945384	0.00785648	0.00936068	9.30397	5.43567	25.149	9.76161	8.48803	8.992
CL(70:4)	0.0506907	0.055281	0.0630221	0.0595591	0.0577558	0.0424942	0.00412856	0.00732759	0.00362905	0.00146233	0.0038891	0.00313952	8.14461	13.2552	5.75838	2.45526	6.7337	7.38812
CL(72:9)	0.0901648	0.0675538	0.0753941	0.0725052	0.0638979	0.0719956	0.024074	0.0147941	0.0235613	0.00680519	0.00500332	0.00460758	26.7	21.8997	31.2508	9.38579	7.83019	6.39981
CL(72:8)	1.44016	1.51906	1.41386	1.43419	1.36652	1.54882	0.137133	0.168229	0.258384	0.244496	0.16813	0.0748888	9.52207	11.0745	18.2751	17.0476	12.3035	4.83522
CL(74:11)	0.0371264	0.0410693	0.0456993	0.0486553	0.039321	0.0306604	0.0102255	0.00523175	0.0107863	0.00478382	0.00273563	0.00199206	27.5423	12.7388	23.6028	9.83205	6.95716	6.49717
CL(74:10)	0.2728	0.296573	0.30451	0.281045	0.274794	0.233345	0.0754233	0.0402574	0.0655326	0.02102	0.0246517	0.0285183	27.6478	13.5742	21.5207	7.47922	8.971	12.2215
CL(74:9)	0.248343	0.211699	0.236324	0.254689	0.292915	0.308147	0.0439111	0.021701	0.0571512	0.0115379	0.0776852	0.0181811	17.6816	10.2509	24.1835	4.53018	26.5214	5.90015
CL(74:8)	0.144556	0.116201	0.137931	0.145382	0.190131	0.244682	0.0438752	0.0220757	0.0410195	0.0251032	0.0781711	0.0263533	30.3518	18.9979	29.7391	17.267	41.1144	10.7704
CL(74:7)	0.0295984	0.0535855	0.0546719	0.0621752	0.0548459	0.0718462	0.00799647	0.00636881	0.0111897	0.00459758	0.0158351	0.0153372	27.0165	11.8853	20.467	7.39456	28.8721	21.3473
CL(76:12)	0.34956	0.314597	0.391227	0.380331	0.350733	0.325572	0.0630791	0.0517483	0.0610112	0.0320334	0.0286371	0.0387992	18.0453	16.4491	15.5948	8.42251	8.16493	11.9172
CL	3.01201	3.08116	3.12832	3.13486	3.05213	3.24831	0.121963	0.197523	0.514756	0.292648	0.333417	0.164196	4.04921	6.41069	16.4547	9.33528	10.9241	5.05481
SM(34:1:2)	6.4446	7.34778	6.7633	7.2093	6.63672	6.8284	0.6366	0.134185	0.752698	0.310781	0.668424	0.569229	9.87803	1.82619	11.1292	4.31083	10.0716	8.3362
SM(36:1:2)	0.084201	0.121886	0.0786813	0.151996	0.0937996	0.099595	0.0157625	0.0143617	0.0191041	0.0361708	0.0447239	0.00913104	18.72	11.7829	24.2803	23.7972	47.6803	9.16817
SM(38:1:2)	0.221664	0.198218	0.206313	0.22413	0.182817	0.160114	0.0560159	0.0140423	0.0844124	0.0102071	0.0209554	0.0129624	25.2707	7.08426	40.9146	4.5541	11.4625	8.09576
SM(40:2:2)	0.147593	0.183602	0.178813	0.192545	0.227931	0.225815	0.0231154	0.0144395	0.00907744	0.0121096	0.0413617	0.00264071	15.6616	7.86457	5.07651	6.28923	18.1466	1.16941
SM(40:1:2)	0.545091	0.547738	0.495388	0.585605	0.531925	0.571125	0.126537	0.0369771	0.184589	0.0378737	0.0558916	0.0309036	23.2139	6.75087	37.2614	6.46744	10.5074	5.411
SM(41:2:2)	0.0313659	0.0651358	0.0691744	0.0687205	0.0886089	0.0998065	0.0228894	0.0109305	0.00812209	0.00401755	0.0186536	0.00541168	72.9755	16.7812	11.7415	5.84622	21.0515	5.42217
SM(41:1:2)	0.207391	0.179814	0.204535	0.206158	0.177212	0.193968	0.0514534	0.0059563	0.0572736	0.0151191	0.0164194	0.0136599	24.8099	3.31248	28.0018	7.33372	9.26544	7.04236
SM(42:2:2)	0.801421	0.964651	1.10646	1.00124	1.08705	1.16273	0.159173	0.0307548	0.189242	0.0566738	0.152273	0.116733	19.8613	3.18818	17.1034	5.66038	14.0079	10.0395
SM(42:1:2)	0.952615	0.684984	0.679826	0.67349	0.711659	0.88057	0.109645	0.0385907	0.0857752	0.0294468	0.0975215	0.103007	11.5099	5.63381	12.6172	4.37227	13.7034	11.6978
SM	9.43594	10.2938	9.78249	10.3132	9.73772	10.2221	0.809067	0.117412	0.605945	0.345174	0.528711	0.406822	8.57431	1.14061	6.19418	3.34692	5.42951	3.97983
Cer(34:1:2)	0.16111	0.17084	0.171208	0.158695	0.152884	0.147915	0.0165034	0.00558548	0.0175989	0.00278501	0.0207859	0.00984224	10.2436	3.26943	10.2793	1.75495	13.5958	6.65399
Cer(40:2:2)	0.00912199	0.0131505	0.0118777	0.0141404	0.0207172	0.0254431	0.00282333	0.000136725	0.00116089	0.00073167	0.00390067	0.00121668	30.9508	1.0397	9.77372	5.17433	18.8282	4.78195
Cer(40:1:2)	0.0261778	0.0263071	0.034273	0.0182468	0.0272229	0.033241	0.00476038	0.00660549	0.00256752	0.000818696	0.00472699	0.00200084	18.1848	25.1091	7.49138	4.48679	17.364	6.01919
Cer(41:1:2)	0.00578953	0.0169368	0.0182422	0.010823	0.0168193	0.0141861	0.00672158	0.00603521	0.00725964	0.00072286	0.0068473	0.000998021	116.099	35.6338	39.7959	6.6789	40.7109	7.03521
Cer(42:2:2)	0.103491	0.0956476	0.0887712	0.0955415	0.115095	0.115048	0.0164499	0.00563211	0.0094174	0.00441591	0.00453834	0.00841655	15.895	5.8884	10.6086	4.62199	3.94311	7.3157
Cer(42:1:2)	0.0651024	0.0613588	0.0509494	0.0445211	0.0656571	0.073331	0.0109111	0.0126087	0.0104252	0.00288034	0.0112516	0.00844172	16.7599	20.5492	20.4619	6.46961	17.1369	11.5118
Cer	0.370792	0.38424	0.375321	0.341967	0.398396	0.409164	0.0450358	0.0160696	0.0340419	0.00987226	0.0326966	0.0110079	12.1458	4.18217	9.07006	2.8869	8.20707	2.69033
Class
LPC	2.07338	2.0927	2.06243	2.0934	1.76294	1.87643	0.309691	0.265468	0.168279	0.0478906	0.191876	0.221666	14.9366	12.6854	8.15928	2.2877	10.8839	11.8132
PC	35.8088	35.3305	35.8331	35.7725	35.0682	33.782	1.30984	0.573055	1.15946	0.500231	0.434969	0.631365	3.65787	1.62198	3.23573	1.39837	1.24035	1.86894
PC-O*	11.0923	11.1704	10.4623	10.4431	12.1194	12.1247	2.2045	0.58895	1.80155	0.361128	0.709493	1.71234	19.8742	5.27239	17.2195	3.45804	5.85417	14.1228
LPE	0.670927	0.66844	0.672784	0.622715	0.470391	0.465225	0.112053	0.0558036	0.0364842	0.00978437	0.0691089	0.0769612	16.7013	8.34833	5.42287	1.57124	14.6918	16.5428
PE	18.8303	17.8116	18.1781	17.8941	18.7429	19.1931	0.789238	0.320852	0.342261	0.286829	0.4485	0.855487	4.19131	1.80137	1.88282	1.60292	2.39291	4.45727
PE-P*	2.2965	2.37289	2.40127	2.55578	2.04454	1.96437	0.496979	0.255032	0.520748	0.149219	0.380526	0.127537	21.6408	10.7477	21.6863	5.83851	18.6118	6.49254
LPI	0.511487	0.462643	0.394507	0.33879	0.372276	0.367215	0.0617806	0.0358487	0.0270696	0.0177624	0.0296055	0.0526332	12.0786	7.74867	6.86163	5.2429	7.95257	14.3331
PI	7.70558	7.86223	7.75337	7.50571	7.43551	7.46414	0.0885441	0.0813262	0.206412	0.131094	0.328962	0.264199	1.14909	1.03439	2.66222	1.7466	4.4242	3.53958
LPS	0.14237	0.166975	0.168645	0.166924	0.135186	0.102451	0.018069	0.00475525	0.0220582	0.013108	0.0177477	0.0180808	12.6916	2.84788	13.0797	7.85268	13.1284	17.6483
PS	7.58326	7.7608	8.21649	8.25539	8.06956	8.19802	0.365068	0.220063	0.349708	0.337316	0.262066	0.412696	4.81414	2.83557	4.25617	4.08601	3.24759	5.0341
PG/BMP*	0.382784	0.40817	0.4388	0.478471	0.49627	0.508513	0.0292456	0.040942	0.0520763	0.0264699	0.0588563	0.00938749	7.64024	10.0306	11.8679	5.53219	11.8597	1.84606
PA	0.0835776	0.133459	0.132124	0.0830247	0.0945269	0.0742922	0.0316561	0.0142017	0.0231965	0.00360226	0.0127163	0.00344512	37.8763	10.6413	17.5566	4.33879	13.4526	4.63726
CL	3.01201	3.08116	3.12832	3.13486	3.05213	3.24831	0.121963	0.197523	0.514756	0.292648	0.333417	0.164196	4.04921	6.41069	16.4547	9.33528	10.9241	5.05481
SM	9.43594	10.2938	9.78249	10.3132	9.73772	10.2221	0.809067	0.117412	0.605945	0.345174	0.528711	0.406822	8.57431	1.14061	6.19418	3.34692	5.42951	3.97983
Cer	0.370792	0.38424	0.375321	0.341967	0.398396	0.409164	0.0450358	0.0160696	0.0340419	0.00987226	0.0326966	0.0110079	12.1458	4.18217	9.07006	2.8869	8.20707	2.69033
Membrane lipids	100	100	100	100	100	100	2.84217e-14	3.0699e-14	1.42109e-14	2.59454e-14	1.64093e-14	1.64093e-14
Data represent mean ± SD (n = 4). CV%, coefficient of variation, calculated as SD/Mean x 100; green fill indicates CV% < 30.
LMD, laser microdissection.
PC and PC-O, diacyl and alkyl-acyl phosphatidylcholine; PE and PE-P, diacyl and alkenyl-acyl phosphatidylethanolamine; PI, phosphatidylinositol; PS, phosphatidylserine; PG, phosphatidylglycerol; BMP, bis(monoacylglycero)phosphate; PA, phosphatidic acid; CL, cardiolipin; LPC, LPE, LPI, and LPS, the corresponding lysolipids;
SM, sphingomyelin; and Cer, ceramide.
Membrane lipids were calculated as the sum of glycerophospho- and sphingolipids, i.e., all quantified lipid species.
Sum formulas for glycero(phospho)lipids are defined as the lipid class abbreviation followed by the total number of carbons and total number of double bonds for all chains, e.g. PC(34:1).
Sum formulas for sphingolipids are defined as the lipid class abbreviation followed by the total number of carbons, total number of double bonds and total number of hydroxyl groups in the long chain base and the fatty acyl moiety, e.g. Cer(34:1:2).
* PC/PE-O(x:y), alkyl-acyl and PC/PE-P(x:y-1), alkenyl-acyl species as well as PG and BMP species are isomeric and therefore could not be resolved by the applied shotgun strategy.
For simplicity, for PC/PE, we indicated the more likely annotation based on literature data and our previous works, whereas for PG/BMP, PG or LPG was used in the species list.

## Sheet: S5 HeLa_pmol
Table S5. Absolute lipid content data for HeLa 2D cell cultures
	Membrane lipid content (pmol)
LMD area (x1000 µm2)	5	10	20	40	80	160	5	10	20	40	80	160	5	10	20	40	80	160	R2
Lipid species	mean						SD						CV%
LPC(16:0)	0.00202453	0.00439133	0.0083703	0.0206026	0.0348394	0.0490794	0.000479445	0.000891505	0.0025214	0.00165471	0.00249192	0.00288608	23.6818	20.3015	30.1232	8.03158	7.1526	5.88042	0.967219
LPC(18:1)	0.00475589	0.00767482	0.0137779	0.0321976	0.0496866	0.0810678	0.000668237	0.00095449	0.00269485	0.00209276	0.00493268	0.00472241	14.0507	12.4366	19.5592	6.49973	9.92759	5.82525	0.983248
LPC	0.00678042	0.0120661	0.0221482	0.0528002	0.084526	0.130147	0.0011375	0.00163891	0.00508057	0.00239958	0.00740199	0.00625428	16.7763	13.5827	22.939	4.54465	8.75705	4.80554	0.979164
PC(30:1)	0.00881848	0.0143246	0.029463	0.0643842	0.127591	0.210811	0.000964135	0.00163528	0.00469911	0.0063032	0.00786028	0.00597134	10.9331	11.4159	15.9492	9.78999	6.16051	2.83256	0.992165
PC(30:0)	0.0233319	0.0398947	0.080196	0.170324	0.32614	0.555575	0.00208445	0.00460669	0.0163086	0.0108962	0.0187472	0.0371042	8.93389	11.5471	20.3359	6.39733	5.74821	6.67854	0.992136
PC(32:2)	0.0100736	0.0165848	0.0324728	0.0671917	0.136201	0.232928	0.000865843	0.00184083	0.00409267	0.00668445	0.0108778	0.00495634	8.59514	11.0995	12.6034	9.94834	7.9866	2.12784	0.99443
PC(32:1)	0.0908665	0.149946	0.298403	0.63735	1.21442	2.09148	0.00567996	0.00932625	0.0470362	0.0519929	0.0670074	0.0923172	6.25089	6.21973	15.7626	8.15767	5.51763	4.41396	0.994178
PC(32:0)	0.0182966	0.03206	0.0639108	0.131428	0.253593	0.447021	0.00162756	0.00388493	0.0149321	0.00895868	0.0123993	0.0335477	8.89546	12.1177	23.3639	6.81641	4.88943	7.50472	0.993274
PC(34:3)	0.000578346	0.00254079	0.00612651	0.0159476	0.0297755	0.0507274	0.000821058	0.000883273	0.00236408	0.00180129	0.00295426	0.00268839	141.967	34.7637	38.5878	11.295	9.9218	5.29967	0.988422
PC(34:2)	0.0489345	0.0793568	0.157814	0.328558	0.643242	1.14556	0.00423504	0.00659553	0.0235865	0.0275615	0.0322783	0.0362499	8.65451	8.31124	14.9457	8.38863	5.01807	3.16439	0.996506
PC(34:1)	0.117221	0.198093	0.390937	0.812398	1.54807	2.8367	0.00477531	0.0123757	0.0752856	0.051987	0.0786347	0.210156	4.07378	6.24741	19.2577	6.3992	5.07952	7.40846	0.994827
PC(36:5)	0	0.000435746	0.00218803	0.00566951	0.0126485	0.0226318	0	0.000871492	0.00149609	0.00122353	0.00168037	0.00248268		200	68.376	21.5809	13.2851	10.9699	0.984246
PC(36:4)	0.00135438	0.00498327	0.00974117	0.0214265	0.0417354	0.0743091	0.000977465	0.00190546	0.00210067	0.00134832	0.00310427	0.00586091	72.1706	38.2372	21.5649	6.29277	7.43798	7.8872	0.992128
PC(36:3)	0.0063315	0.0105377	0.0195243	0.0432761	0.0815191	0.150176	0.00111211	0.000477225	0.00335264	0.00231676	0.00529817	0.00737457	17.5647	4.52872	17.1716	5.35344	6.4993	4.91062	0.996354
PC(36:2)	0.0535603	0.089869	0.174501	0.351795	0.68913	1.27083	0.00316586	0.00655031	0.0370603	0.0234236	0.0325037	0.0583833	5.91083	7.28873	21.2379	6.65831	4.71663	4.59409	0.996977
PC(36:1)	0.00301906	0.00581892	0.0131391	0.0281193	0.051908	0.0995024	0.000261259	0.000497323	0.00425881	0.00184676	0.00174613	0.0107187	8.65364	8.54666	32.4132	6.56759	3.36389	10.7723	0.991648
PC(38:6)	0	0.00149512	0.00397874	0.011332	0.0226705	0.0407395	0	0.00109345	0.00269517	0.00127499	0.00305487	0.00452113		73.1343	67.7392	11.2513	13.4751	11.0977	0.984853
PC(38:5)	0	0.00181708	0.00557943	0.0135347	0.0274892	0.0519603	0	0.00122311	0.00205127	0.000643107	0.00187025	0.00406909		67.3121	36.7648	4.75155	6.8036	7.83115	0.993826
PC(38:4)	0	0.000417835	0.00152252	0.00494103	0.00945145	0.019779	0	0.000500717	0.00126268	0.000989105	0.000836597	0.000889737		119.836	82.9339	20.0182	8.85152	4.49839	0.993747
PC(38:3)	0	0.000363232	0.00151622	0.00242402	0.00766687	0.0149882	0	0.000436643	0.00102481	0.00101378	0.000861879	0.00326676		120.21	67.5898	41.8224	11.2416	21.7956	0.968327
PC(38:2)	0.000867508	0.00308912	0.00639592	0.0145525	0.028563	0.0525534	0.000612502	0.000450734	0.0027685	0.00137465	0.00162556	0.00499948	70.6048	14.591	43.2854	9.44613	5.69115	9.51315	0.99129
PC(40:7)	0	0.000191378	0.00190555	0.00292681	0.00941445	0.0203608	0	0.000382757	0.00133034	0.000489515	0.000761377	0.00203049		200	69.8139	16.7252	8.08733	9.97257	0.988746
PC(40:6)	0	0	0.000645649	0.000322594	0.00420788	0.00917762	0	0	0.000848409	0.000645187	0.0017269	0.00298216			131.404	200	41.0397	32.4938	0.920514
PC	0.383253	0.651819	1.29996	2.7279	5.26544	9.39782	0.0220966	0.0462105	0.242193	0.196185	0.269647	0.508762	5.76554	7.08947	18.6308	7.19181	5.12107	5.41361	0.995369
PC-O(32:1)	0.0119721	0.0196896	0.0404927	0.082782	0.160169	0.280701	0.000805965	0.00225941	0.00990938	0.00566942	0.00954623	0.0197005	6.73203	11.4751	24.472	6.84861	5.9601	7.01834	0.993161
PC-O(32:0)	0.00841909	0.0156001	0.028288	0.0596226	0.101485	0.211163	0.000115	0.000716443	0.00444146	0.00370451	0.00658232	0.0118601	1.36594	4.59256	15.7009	6.21327	6.48602	5.61657	0.996369
PC-O(34:2)	0.00613854	0.0101498	0.0199718	0.0402453	0.0801355	0.149562	0.000365246	0.000569643	0.00506904	0.00213099	0.00485197	0.0096608	5.95004	5.61236	25.381	5.29502	6.05471	6.45941	0.995818
PC-O(34:1)	0.0146628	0.0246098	0.0485169	0.0996976	0.189599	0.342636	0.0011162	0.00318239	0.0095274	0.00531608	0.0127765	0.0253563	7.61252	12.9314	19.6373	5.3322	6.7387	7.40036	0.994105
PC-O(36:5)	0	0	0.000635056	0.000366185	0.00417216	0.00832812	0	0	0.000739314	0.00073237	0.000850085	0.00245702			116.417	200	20.3752	29.5027	0.937034
PC-O(36:4)	0	0.000340096	0.00163217	0.00406277	0.00875204	0.0168958	0	0.000406496	0.00144186	0.000636097	0.000323783	0.00260739		119.524	88.3402	15.6567	3.69951	15.4322	0.982879
PC-O(36:3)	0	0.00167294	0.00434293	0.00832603	0.0173002	0.0384053	0	0.000493025	0.00293217	0.000974258	0.00273807	0.00287619		29.4706	67.516	11.7013	15.8268	7.48904	0.990019
PC-O(36:2)	0.00249121	0.00464149	0.0103006	0.0210543	0.0394882	0.072001	0.000493162	0.000163515	0.00315546	0.00106224	0.00237554	0.00606062	19.7961	3.5229	30.6338	5.04524	6.01584	8.41742	0.992736
PC-O(38:6)	0	0.000502396	0.00229985	0.00593926	0.0140794	0.0250896	0	0.000580334	0.00159355	0.00118522	0.000680803	0.0036123		115.513	69.2894	19.9556	4.83546	14.3976	0.98333
PC-O(38:5)	0	0.000841888	0.00231543	0.00561222	0.0123595	0.0221625	0	0.000583365	0.00161975	0.000391518	0.00199552	0.00298119		69.2925	69.9545	6.97617	16.1456	13.4515	0.98151
PC-O*	0.0436837	0.0780481	0.158795	0.327708	0.627539	1.16694	0.00248371	0.0072902	0.039082	0.0191739	0.0385902	0.0765721	5.68566	9.34065	24.6116	5.85091	6.14945	6.56177	0.995414
LPE(16:1)	0.000993232	0.0020007	0.00371338	0.00833574	0.0111144	0.01144	0.000127775	0.000280703	0.00074915	0.00152726	0.00132356	0.00308803	12.8646	14.0302	20.1744	18.3219	11.9085	26.9932	0.818731
LPE(16:0)	0.00146297	0.00187184	0.00327097	0.00742263	0.0113818	0.0136152	0.000151852	0.000346465	0.000436335	0.000826396	0.000887905	0.00225182	10.3797	18.5093	13.3396	11.1335	7.80107	16.539	0.917986
LPE(18:2)	0.000732994	0.00130466	0.00288991	0.00638089	0.00737131	0.00877167	4.24227e-05	0.00015989	0.000611197	0.00142695	0.000827055	0.00278997	5.78759	12.2553	21.1493	22.3629	11.2199	31.8066	0.823594
LPE(18:1)	0.0049243	0.00776817	0.0150738	0.0294673	0.0489139	0.0612456	0.000901169	0.0015469	0.00390908	0.00247723	0.00588815	0.0142123	18.3004	19.9133	25.9329	8.40671	12.0378	23.2054	0.919112
LPE(18:0)	0.00127365	0.00180223	0.00300726	0.00714502	0.0120567	0.0161513	0.000365109	0.000230467	0.000395742	0.000249686	0.000738467	0.00176067	28.6664	12.7878	13.1595	3.49455	6.12497	10.9011	0.958745
LPE(20:4)	0.00193151	0.00302337	0.00655588	0.0106071	0.0203657	0.0217407	0.000467652	0.000360736	0.00111594	0.0010145	0.00441039	0.00872207	24.2118	11.9316	17.0219	9.56427	21.656	40.1187	0.836209
LPE(22:6)	0.000953666	0.0014939	0.00361634	0.00676942	0.0113973	0.0117707	9.91074e-05	0.000285115	0.000614033	0.00110165	0.00279726	0.00466612	10.3923	19.0853	16.9794	16.2739	24.5431	39.6419	0.813997
LPE(22:5)	0.000577363	0.00114121	0.00251384	0.00521491	0.00765153	0.0079425	0.000101126	0.000247529	0.00047593	0.000743749	0.00214455	0.00321318	17.5151	21.69	18.9324	14.262	28.0278	40.4555	0.792477
LPE	0.0128497	0.0204061	0.0406414	0.0813431	0.130253	0.152678	0.00139393	0.00299741	0.00787852	0.00814528	0.01874	0.0385041	10.848	14.6888	19.3854	10.0135	14.3874	25.2192	0.894386
PE(32:1)	0.0157485	0.0252737	0.0491384	0.106358	0.21434	0.346569	0.00136266	0.00258608	0.00632355	0.0102191	0.0124502	0.00802557	8.6526	10.2323	12.8689	9.60823	5.80862	2.31572	0.991297
PE(32:0)	0.0012092	0.00241294	0.00470485	0.00990235	0.0204111	0.03369	0.000215599	0.000421906	0.00088666	0.000668336	0.00156017	0.00174002	17.8299	17.4852	18.8456	6.74926	7.64375	5.16479	0.99113
PE(34:2)	0.0216134	0.0352889	0.0698795	0.144708	0.294595	0.489562	0.00260128	0.0036583	0.0082743	0.0126338	0.0105397	0.014741	12.0355	10.3667	11.8408	8.7305	3.57767	3.01107	0.993641
PE(34:1)	0.038594	0.0656963	0.127883	0.273134	0.535484	0.914372	0.00227652	0.00521346	0.0173038	0.0206888	0.0253778	0.0261103	5.89863	7.93569	13.531	7.57461	4.73922	2.85554	0.994827
PE(36:4)	0.00467411	0.00766531	0.0149723	0.033085	0.0657192	0.111561	0.000321808	0.000822052	0.0018137	0.00254283	0.00548846	0.00545116	6.8849	10.7243	12.1137	7.68576	8.35138	4.88626	0.992771
PE(36:3)	0.00633874	0.0101585	0.02002	0.0440223	0.0872275	0.147133	0.000771124	0.000808544	0.00287874	0.00192049	0.00423071	0.00526101	12.1653	7.95932	14.3793	4.36253	4.8502	3.57568	0.993986
PE(36:2)	0.040557	0.0677851	0.137128	0.281913	0.56413	0.974718	0.00217243	0.00636161	0.015605	0.0184301	0.023488	0.0347759	5.35649	9.38497	11.3799	6.53752	4.16357	3.5678	0.995534
PE(36:1)	0.0145625	0.0243334	0.0493377	0.102808	0.197567	0.348428	0.000660366	0.00128068	0.00950842	0.0061218	0.00846966	0.0191689	4.53471	5.26305	19.2721	5.95458	4.28698	5.50153	0.99501
PE(38:6)	0.00348177	0.00593191	0.0123222	0.0265531	0.0536761	0.0914158	0.000454818	0.000666011	0.0013926	0.00172199	0.00389024	0.00534653	13.0629	11.2276	11.3015	6.48509	7.24761	5.84859	0.992845
PE(38:5)	0.00627734	0.0102569	0.020498	0.0449798	0.0905028	0.159458	0.000358899	0.000768286	0.00277336	0.00179479	0.00878941	0.00657944	5.71737	7.49041	13.5299	3.99021	9.71176	4.12614	0.994743
PE(38:4)	0.00587559	0.0106856	0.0213101	0.0470895	0.0941002	0.166278	0.000177909	0.000117999	0.0048289	0.00263865	0.00522347	0.011839	3.02793	1.10428	22.6601	5.60349	5.55097	7.12004	0.993748
PE(38:3)	0.000516899	0.00175792	0.00406457	0.0094019	0.018522	0.0326265	0.000396434	0.000433108	0.00106542	0.00103431	0.00147623	0.00308082	76.6947	24.6376	26.2123	11.0011	7.97014	9.4427	0.989783
PE(38:2)	0.00247244	0.00462328	0.00867238	0.0190753	0.0376728	0.0685797	0.000173776	0.000403851	0.0020799	0.00163864	0.000968865	0.00383179	7.02853	8.73516	23.9831	8.59038	2.57179	5.58736	0.995994
PE(38:1)	0	0.000105103	0.000705758	0.00148409	0.00402767	0.0072256	0	0.000210206	0.000532453	0.000325	0.000474572	0.0024648		200	75.4441	21.8989	11.7828	34.112	0.939712
PE(40:7)	0.00187446	0.00413956	0.00801618	0.0184174	0.0359715	0.061701	0.000159493	0.000347381	0.00111182	0.00161703	0.00287212	0.00157058	8.50876	8.39173	13.8697	8.77988	7.98442	2.54547	0.993805
PE(40:6)	0.00368271	0.00654179	0.0135346	0.030309	0.0588538	0.10666	0.000350593	0.000544096	0.00174129	0.00176902	0.00401626	0.0050092	9.51998	8.31724	12.8654	5.83662	6.82414	4.69644	0.995989
PE(40:5)	5.29732e-05	0.00104139	0.00255544	0.0059243	0.0123173	0.0224974	2.58841e-05	0.000425839	0.000860723	0.000640836	0.000626323	0.00264932	48.8627	40.8915	33.6819	10.8171	5.08491	11.7761	0.989324
PE	0.167532	0.283698	0.564742	1.19917	2.38512	4.08247	0.0102699	0.0229841	0.0769189	0.0813477	0.115539	0.14069	6.13013	8.10161	13.6202	6.78369	4.84416	3.44621	0.994832
PE-P(34:2)	0.00414364	0.00595361	0.0125813	0.0273791	0.0559812	0.0946566	0.000279697	0.000621516	0.00152687	0.00133779	0.00211337	0.0011095	6.75002	10.4393	12.136	4.88616	3.77514	1.17214	0.994994
PE-P(34:1)	0.0166074	0.0266079	0.0530073	0.117084	0.232838	0.398767	0.000488472	0.00187361	0.00845207	0.00486187	0.00720252	0.0138997	2.94129	7.04154	15.9451	4.15247	3.09336	3.48566	0.995048
PE-P(34:0)	0	0.00130058	0.00262465	0.00612819	0.0119458	0.0209354	0	0.000313657	0.000766688	0.000245311	0.000967271	0.000351254		24.1166	29.2111	4.003	8.09719	1.6778	0.993652
PE-P(36:5)	0.00169282	0.00375317	0.00784993	0.0160489	0.0307547	0.0586643	0.000283673	0.00025749	0.00169861	0.000759246	0.00203179	0.00601481	16.7574	6.86059	21.6386	4.73084	6.60642	10.2529	0.992619
PE-P(36:4)	0.010069	0.0159078	0.0323955	0.0765724	0.15753	0.263987	0.000272593	0.000522558	0.0055056	0.0038212	0.0115274	0.013573	2.70727	3.28492	16.9949	4.9903	7.31759	5.14155	0.992048
PE-P(36:3)	0.00186835	0.00378406	0.00816727	0.0189694	0.0374636	0.0649709	0.000309844	0.000272066	0.00163179	0.000375978	0.00172575	0.00378554	16.5838	7.18979	19.9796	1.98202	4.60647	5.82652	0.993758
PE-P(36:2)	0.00795562	0.0123348	0.0247918	0.055149	0.112094	0.193036	0.000222622	0.000971109	0.00450922	0.00331265	0.00370736	0.00842195	2.7983	7.87292	18.1884	6.00672	3.30736	4.36289	0.994826
PE-P(36:1)	0.00377812	0.00640317	0.0129146	0.0280924	0.0553272	0.0980799	0.000561483	0.000592025	0.00250814	0.000870648	0.00159917	0.00578738	14.8614	9.24581	19.421	3.09923	2.89038	5.90067	0.995257
PE-P(36:0)	0	0.00039579	0.00123591	0.00306211	0.00597157	0.00990353	0	0.000269993	0.000892527	0.000590187	0.000366093	0.00234251		68.2162	72.216	19.2739	6.1306	23.6533	0.959172
PE-P(38:6)	0.00545003	0.00964675	0.0197532	0.0445485	0.0934878	0.168032	0.000190765	0.000470851	0.00376119	0.00224493	0.00663039	0.0100418	3.50026	4.88093	19.041	5.0393	7.09226	5.97614	0.995051
PE-P(38:5)	0.0072841	0.012789	0.0255524	0.0569792	0.114063	0.210034	0.000430585	0.00059343	0.00444109	0.00434159	0.00675095	0.0128619	5.9113	4.64016	17.3804	7.6196	5.91863	6.12375	0.99582
PE-P(38:4)	0.00359198	0.00629775	0.0127354	0.029391	0.059883	0.104381	0.000328943	0.000275067	0.00246322	0.00107235	0.00350532	0.00598432	9.15772	4.36771	19.3415	3.64855	5.85361	5.73313	0.994165
PE-P(40:7)	0.000638682	0.00246639	0.00543536	0.0123036	0.0269092	0.0498065	0.000454614	0.000179486	0.0013242	0.00116179	0.00172153	0.00375835	71.18	7.27727	24.3627	9.44267	6.39756	7.5459	0.99453
PE-P(40:6)	0	0.00134595	0.00409011	0.00618123	0.0150117	0.0442646	0	0.000948919	0.00192773	0.00111759	0.00346713	0.00808695		70.502	47.1315	18.0803	23.0962	18.2696	0.965673
PE-P(40:5)	0	0.000528422	0.00214781	0.00490483	0.0101781	0.022218	0	0.000617297	0.00151838	0.000799876	0.000530568	0.00413535		116.819	70.6946	16.3079	5.21284	18.6127	0.978757
PE-P(40:4)	0	0	0.000146747	0.00063536	0.00174819	0.00323471	0	0	0.000171123	9.16277e-05	0.000466347	0.00104797			116.611	14.4214	26.6759	32.3977	0.941166
PE-P*	0.0630797	0.109515	0.225429	0.503429	1.02119	1.80497	0.00153674	0.00603566	0.042671	0.0243879	0.0467903	0.0866306	2.43619	5.51126	18.9288	4.84436	4.58195	4.79955	0.995541
LPI(18:1)	0.00144382	0.00216943	0.00517608	0.00972275	0.0148316	0.0252653	8.08333e-05	0.000543194	0.0012559	0.000498783	0.0012253	0.00422646	5.59859	25.0386	24.2635	5.13006	8.26142	16.7283	0.97207
LPI(18:0)	0.000584853	0.00141238	0.00250635	0.00606632	0.0107085	0.0147718	0.000197395	0.000177165	0.000861148	0.000568566	0.00109668	0.00153931	33.7512	12.5437	34.3587	9.37251	10.2412	10.4206	0.960517
LPI	0.00202867	0.00358181	0.00768243	0.0157891	0.0255401	0.0400371	0.0002552	0.000592289	0.00210226	0.00106543	0.00231911	0.00555369	12.5797	16.536	27.3645	6.7479	9.08027	13.8713	0.971796
PI(34:2)	0.00719937	0.0114666	0.0225575	0.0469863	0.09485	0.157255	0.000503567	0.00166782	0.00305522	0.0044407	0.00335187	0.00308176	6.9946	14.545	13.5441	9.45105	3.53387	1.95972	0.993634
PI(34:0)	0	5.40046e-05	0.000580447	0.00205899	0.00419559	0.00814927	0	0.000108009	0.000415463	0.000278411	0.000240113	0.000600613		200	71.5765	13.5217	5.72299	7.37014	0.993308
PI(36:4)	0	0.000725629	0.00189484	0.00555018	0.0108993	0.0169126	0	0.000355139	0.000655183	0.000434136	0.000417004	0.000860156		48.9422	34.5772	7.82202	3.82598	5.08589	0.982847
PI(36:3)	0.00176042	0.00313594	0.00610976	0.0128717	0.0255344	0.0437864	0.000144098	0.000194659	0.00112604	0.000974155	0.00136198	0.00419433	8.18541	6.20737	18.4301	7.56821	5.33388	9.57907	0.990426
PI(36:2)	0.0222894	0.0375729	0.0752275	0.153837	0.300598	0.525938	0.00229072	0.00303249	0.0140525	0.00681244	0.0119038	0.0236248	10.2772	8.07096	18.68	4.42834	3.96006	4.49193	0.995518
PI(36:1)	0.0155576	0.027758	0.0542451	0.111665	0.216925	0.397512	0.000591785	0.000906277	0.0104186	0.00729454	0.00912879	0.014446	3.80383	3.26492	19.2065	6.53254	4.20827	3.6341	0.99733
PI(38:5)	0.00350208	0.00661906	0.0128832	0.0283671	0.055257	0.0985904	0.00125683	0.000936217	0.00187909	0.00215703	0.0037067	0.0101352	35.888	14.1442	14.5855	7.60396	6.70812	10.2801	0.990899
PI(38:4)	0.0076388	0.0139142	0.0275491	0.0582601	0.115351	0.205654	0.000617504	0.000732201	0.00502103	0.00502516	0.0059371	0.0134931	8.08378	5.26227	18.2258	8.62539	5.14698	6.56108	0.994605
PI(38:2)	0.00434956	0.00725931	0.0135659	0.0263497	0.051873	0.0970012	0.00028878	0.000300291	0.0022372	0.00166893	0.00177108	0.00570899	6.63929	4.13663	16.4913	6.33376	3.41427	5.88549	0.996984
PI(40:6)	0	0.00119238	0.00261074	0.00546255	0.011143	0.020903	0	0.000193624	0.000387466	0.000309835	0.000855508	0.0019216		16.2384	14.8412	5.67198	7.67755	9.19291	0.993147
PI(40:5)	0	0.000895908	0.0024564	0.00562728	0.0104457	0.019131	0	0.000200708	0.000635048	0.000326424	0.000561221	0.00113962		22.4027	25.8529	5.80073	5.37272	5.95691	0.993865
PI	0.0622972	0.110594	0.219681	0.457036	0.897072	1.59083	0.00380537	0.00660609	0.0391205	0.02598	0.037515	0.0706822	6.10841	5.97329	17.8079	5.68445	4.18194	4.44309	0.996005
PS(34:1)	0.0243464	0.0454942	0.0861034	0.183769	0.357802	0.632942	0.00233696	0.0043155	0.0133756	0.0140201	0.0182615	0.0129522	9.59879	9.48582	15.5343	7.6292	5.1038	2.04634	0.996481
PS(36:2)	0.0147975	0.0244468	0.0441332	0.087426	0.172889	0.31497	0.00126075	0.00217249	0.00541817	0.00580359	0.00868061	0.00533824	8.52002	8.88661	12.2769	6.63829	5.02092	1.69484	0.998066
PS(36:1)	0.0226094	0.0414231	0.0812875	0.171671	0.324305	0.591087	0.00135631	0.00376406	0.0147288	0.00928888	0.0171008	0.0301398	5.99886	9.08687	18.1194	5.41086	5.27306	5.09905	0.996167
PS(38:4)	0	0.000832709	0.00241567	0.00622459	0.0121517	0.0221058	0	0.000294249	0.000859802	0.000349991	0.000779836	0.00116026		35.3364	35.5928	5.62271	6.4175	5.24865	0.994074
PS(38:3)	0	0.00138065	0.00240645	0.00689809	0.0133457	0.0235415	0	0.000188777	0.00165221	0.000230106	0.000862431	0.00224112		13.673	68.6575	3.33579	6.46226	9.51987	0.987808
PS(38:2)	0.00135894	0.00325169	0.00598601	0.0126302	0.0258045	0.0472047	0.000273824	0.000670891	0.00129966	0.00119414	0.00119714	0.00336035	20.1498	20.6321	21.7116	9.45458	4.63928	7.11867	0.994889
PS(38:1)	0	0.00153854	0.00325133	0.00793887	0.0149267	0.026325	0	0.000413163	0.00125468	0.00030522	0.000730468	0.00112285		26.8543	38.5897	3.84463	4.89369	4.26533	0.992836
PS(40:6)	0	0	0.000993496	0.0047142	0.0094864	0.0184803	0	0	0.00132288	0.00120965	0.00269245	0.00507432			133.154	25.6598	28.3822	27.4579	0.950068
PS(40:4)	0	0	0.000575641	0.00170039	0.00384202	0.00735048	0	0	0.000444139	0.00027108	0.000233752	0.000984713			77.1555	15.9423	6.08408	13.3966	0.987033
PS(40:3)	0	0	0.0002173	0.00052785	0.00184008	0.00285274	0	0	0.000250916	0.000362959	0.000280921	0.00118469			115.47	68.7618	15.2667	41.5283	0.905967
PS(40:2)	0.000374519	0.00180324	0.00370827	0.00802111	0.0164561	0.0313544	0.000432883	0.000560531	0.000939052	0.000417086	0.00110673	0.00107579	115.584	31.0847	25.3231	5.19985	6.72538	3.43107	0.997284
PS(40:1)	0	8.17952e-05	0.00103278	0.00376821	0.00635498	0.0103163	0	0.00016359	0.000783298	0.000442933	0.00094339	0.0027112		200	75.8435	11.7545	14.8449	26.2808	0.945844
PS	0.0634868	0.120253	0.232111	0.49529	0.959204	1.72853	0.0039848	0.0114141	0.041236	0.0289151	0.0509644	0.0622205	6.27658	9.4918	17.7656	5.83802	5.3132	3.59962	0.996627
PG(34:2)	0.00129654	0.00181424	0.00341365	0.00782549	0.0141488	0.0225199	0.000149712	0.000129657	0.000485104	0.000553469	0.00120655	0.00228596	11.547	7.14664	14.2107	7.07264	8.52762	10.1509	0.982991
PG(34:1)	0.00369138	0.00574144	0.0116436	0.0239208	0.0448005	0.0807461	0.000300476	0.000411253	0.00216909	0.00153348	0.00242625	0.00436769	8.13993	7.1629	18.6291	6.41066	5.41567	5.40917	0.995563
PG(36:3)	0	0.000442987	0.000990746	0.00258608	0.00483657	0.0073881	0	0.000120679	0.000340508	0.000243416	0.000327478	0.000840836		27.2421	34.3689	9.41256	6.77086	11.3809	0.974758
PG(36:2)	0.00350158	0.00500096	0.0092689	0.0220752	0.0392242	0.0622441	0.000253602	0.000447331	0.00156925	0.00222099	0.00238182	0.00533398	7.24249	8.94491	16.9303	10.061	6.07232	8.56945	0.984006
PG(36:1)	0.00110994	0.00164551	0.0030324	0.00649649	0.0111915	0.0211421	0.000136379	0.000171623	0.000374884	0.000257564	0.000604112	0.00162737	12.2871	10.4297	12.3626	3.96466	5.39794	7.69728	0.99471
PG(38:3)	0	4.91371e-05	0.000421685	0.000725396	0.0015079	0.0034043	0	9.82742e-05	0.0002422	6.66597e-05	0.000275205	0.00201495		200	57.4362	9.18942	18.2508	59.1884
PG(40:7)	0	0.000568876	0.00136419	0.00333909	0.00612669	0.0102823	0	0.000142699	0.000187391	0.000291513	0.000495403	0.000958979		25.0844	13.7364	8.73031	8.08598	9.32649	0.98571
PG*	0.00959943	0.0152631	0.0301351	0.0669685	0.121836	0.207727	0.000605212	0.000783394	0.00503171	0.0037872	0.00653758	0.0122898	6.30467	5.13259	16.6971	5.65519	5.36588	5.91633	0.992366
PA(32:1)	0.000534499	0.00110949	0.00297766	0.00527823	0.0109531	0.0202305	5.38078e-05	0.000325317	0.000582633	0.000663984	0.00145835	0.00143743	10.067	29.3212	19.5668	12.5797	13.3145	7.10524	0.992179
PA(32:0)	0	0.000621365	0.00128982	0.00235306	0.00451171	0.00880724	0	0.000223862	0.000424103	0.000497862	0.000548735	0.00134795		36.0274	32.8808	21.1581	12.1625	15.305	0.981168
PA(34:2)	0.000298029	0.000965672	0.00215694	0.00320635	0.00681238	0.012332	0.000356485	0.000392076	0.000263662	0.000388277	0.00127772	0.000207566	119.614	40.6014	12.2239	12.1096	18.7559	1.68314	0.989914
PA(34:1)	0.0011664	0.00231771	0.0052699	0.00864881	0.0182884	0.0323852	0.000494157	0.000325574	0.00115046	0.000807779	0.00175052	0.00359659	42.366	14.0472	21.8308	9.33978	9.57177	11.1056	0.988397
PA(36:2)	0	0.000942492	0.00238882	0.00346668	0.00774396	0.0136886	0	0.000291968	0.000477695	0.00020409	0.000930906	0.000978494		30.9783	19.9971	5.8872	12.0211	7.14826	0.989549
PA(36:1)	0	0.000448443	0.00140426	0.00203629	0.00355395	0.00660865	0	7.82428e-05	0.000354583	0.000300408	0.000160509	0.00134038		17.4477	25.2504	14.7527	4.51635	20.2822	0.968515
PA	0.00199893	0.00640517	0.0154874	0.0249894	0.0518635	0.0940522	0.000642875	0.0014183	0.00251698	0.00240382	0.00576352	0.0080769	32.161	22.143	16.2518	9.61934	11.1129	8.58768	0.991103
CL(68:6)	0	0	0.000620828	0.00223614	0.00487265	0.00859955	0	0	0.000469663	0.000107149	0.000258528	0.00262135			75.6509	4.79169	5.30569	30.4824	0.95215
CL(68:5)	0.00194477	0.003637	0.00706607	0.013662	0.0283915	0.0525401	0.000307596	0.000251415	0.000669942	0.00107862	0.000750238	0.002193	15.8166	6.91271	9.48111	7.89508	2.64248	4.17395	0.997853
CL(68:4)	0.00362622	0.00595938	0.0117956	0.0225444	0.0480603	0.088725	0.000404988	0.000872342	0.00188435	0.00188972	0.00292023	0.00644029	11.1683	14.6381	15.975	8.38221	6.07619	7.25871	0.995183
CL(70:7)	0	0	0.000446239	0.00152724	0.00316845	0.00576978	0	0	0.000322731	0.000109325	0.000500581	0.00112802			72.3225	7.15839	15.7989	19.5504	0.973353
CL(70:6)	0.000590335	0.00157136	0.00269209	0.00574176	0.0114376	0.0238287	5.95333e-05	0.000152344	0.000685246	0.000361979	0.000529189	0.00235272	10.0847	9.69501	25.4541	6.30431	4.62675	9.87351	0.993623
CL(70:5)	0.00219083	0.00396007	0.00817043	0.016111	0.0332306	0.0627493	0.00023614	0.000305247	0.00116404	0.000491319	0.00332013	0.00191901	10.7786	7.70812	14.2469	3.04959	9.9912	3.05822	0.997308
CL(70:4)	0.00150415	0.00266939	0.00543064	0.0102373	0.0208693	0.0418599	0.000298471	0.000404434	0.000516472	0.000892717	0.000823856	0.004652	19.8432	15.1508	9.51035	8.72023	3.9477	11.1133	0.992617
CL(72:8)	0	0	0	0.000148791	0.00131865	0.00270111	0	0	0	0.000297583	0.000296858	0.000779699				200	22.5123	28.8659	0.942644
CL(72:7)	0	0	0.000620703	0.0015382	0.00310965	0.00606582	0	0	0.000300925	0.000398065	0.000265823	0.00052297			48.4813	25.8786	8.54834	8.62159	0.990537
CL(72:6)	0	0.000950305	0.00179299	0.00371332	0.00721935	0.0143426	0	9.90591e-05	0.000328467	0.000215672	0.000439124	0.00231479		10.4239	18.3195	5.80807	6.0826	16.1393	0.984867
CL	0.0098563	0.0187475	0.0386355	0.0774601	0.161678	0.307182	0.000755721	0.00196628	0.00582895	0.00459025	0.00743241	0.021713	7.66739	10.4882	15.087	5.92595	4.59705	7.06845	0.996286
SM(32:1:2)	0.000862666	0.00263181	0.00548351	0.0116675	0.0220014	0.0456215	0.000184455	0.000324555	0.00191661	0.00130061	0.00315293	0.0039079	21.3819	12.332	34.9522	11.1472	14.3306	8.56593	0.991852
SM(34:1:2)	0.018321	0.0327498	0.0665457	0.132345	0.250267	0.464021	0.00188023	0.00156559	0.00886339	0.0134551	0.00978742	0.0242849	10.2627	4.78046	13.3193	10.1667	3.9108	5.23357	0.996659
SM(36:1:2)	0.00287577	0.00563324	0.0112145	0.0212088	0.0416893	0.0819615	0.000360916	0.00049865	0.00331869	0.00233272	0.00162585	0.00795259	12.5502	8.85192	29.5929	10.9988	3.89991	9.70285	0.993218
SM(40:2:2)	0.00215787	0.00465377	0.00935891	0.0190632	0.0372313	0.0678011	7.20426e-05	0.000661586	0.00182204	0.00180863	0.000679702	0.003798	3.3386	14.2161	19.4685	9.48754	1.82562	5.60168	0.996041
SM(40:1:2)	0.00226561	0.00515342	0.0111704	0.0220014	0.0438456	0.0862412	0.000759167	0.000248525	0.00260175	0.00365613	0.0017308	0.00240735	33.5083	4.82253	23.2914	16.6177	3.94749	2.79141	0.997763
SM(41:1:2)	0	5.86082e-05	0.0014239	0.00319795	0.00581055	0.0118193	0	0.000117216	0.000541212	0.000825303	0.000966008	0.0017669		200	38.0091	25.8073	16.6251	14.9493	0.980104
SM(42:3:2)	0.00356904	0.00636834	0.0130831	0.0258254	0.0528084	0.0996835	0.000484226	0.000887132	0.00155363	0.00233447	0.00415596	0.00928841	13.5674	13.9303	11.8751	9.03944	7.86989	9.31791	0.993484
SM(42:2:2)	0.0115045	0.0206713	0.0453921	0.0926021	0.186937	0.346756	0.000394753	0.00184664	0.00954683	0.0120389	0.00927952	0.0323224	3.43131	8.93336	21.0319	13.0007	4.96397	9.32137	0.993056
SM(42:1:2)	0.0053817	0.00830691	0.0163826	0.0282836	0.046848	0.104086	0.000368755	0.00124216	0.00163984	0.00212441	0.00290807	0.00793118	6.85202	14.9533	10.0096	7.51109	6.20746	7.61984	0.993052
SM	0.0469381	0.0862272	0.180055	0.356195	0.687439	1.30799	0.00182981	0.00497681	0.0300991	0.0382453	0.0259331	0.0737277	3.89835	5.77174	16.7166	10.7372	3.77243	5.63671	0.996878
Cer(34:1:2)	0.000678898	0.000933945	0.00167655	0.0030025	0.00518789	0.00961459	0.000166947	6.20953e-05	0.00021142	0.000393038	0.000301825	0.000506412	24.591	6.64871	12.6104	13.0904	5.81787	5.26712	0.995549
Cer(36:1:2)	0	0.000137342	0.000462785	0.000811414	0.00144132	0.002392	0	0.0001586	0.000193256	0.000295672	0.000147475	0.000282359		115.478	41.7594	36.4391	10.2319	11.8043	0.967021
Cer(40:1:2)	0.000385775	0.000707083	0.00114167	0.00204853	0.00373347	0.00757581	0.000183991	0.000265678	0.000263965	0.000193464	9.85002e-05	0.000963222	47.6938	37.5738	23.1209	9.44404	2.6383	12.7144	0.988216
Cer(41:1:2)	0.00028756	0.000314916	0.000652045	0.00110685	0.00220263	0.00389434	7.88956e-05	0.000157426	0.00022989	0.000211991	0.000208425	0.000236025	27.4362	49.9897	35.2567	19.1527	9.46255	6.06071	0.989909
Cer(42:3:2)	0	0.000295777	0.00116593	0.00216362	0.00401799	0.00826567	0	0.000362329	0.00025613	0.000141139	0.00039348	0.0012881		122.5	21.9679	6.52327	9.79296	15.5837	0.983368
Cer(42:2:2)	0.0010908	0.00210567	0.00461848	0.00831591	0.0162099	0.031969	0.000230423	0.000320786	0.000777077	0.000399709	0.000975386	0.00228351	21.1242	15.2344	16.8254	4.80655	6.01723	7.14291	0.99603
Cer(42:1:2)	0.00114938	0.00195083	0.00324695	0.00561799	0.0106735	0.022468	0.000181948	0.000315907	0.000664187	0.000422553	0.00061073	0.00331725	15.8301	16.1935	20.4557	7.52143	5.72194	14.7643	0.985514
Cer	0.00359242	0.00644556	0.0129644	0.0230668	0.0434667	0.0861793	0.000549584	0.00157805	0.00253217	0.000950232	0.00235795	0.00769597	15.2985	24.4827	19.5317	4.11948	5.42474	8.93018	0.994194
HexCer(34:1:2)	0	0.000167598	0.000951347	0.00192625	0.00328407	0.00713441	0	0.000193933	0.000235229	0.000211975	0.000364355	0.000921122		115.713	24.7259	11.0046	11.0946	12.911	0.986278
HexCer(40:1:2)	0	0.000553069	0.00152798	0.00273605	0.00464895	0.0106656	0	8.60748e-05	0.00041646	0.000189546	0.000530691	0.0014041		15.5631	27.2556	6.92772	11.4153	13.1648	0.985101
HexCer(42:2:2)	0.000184712	0.00132594	0.00350268	0.00674573	0.0124833	0.0276939	0.000215065	0.000444557	0.00132342	0.000384164	0.00131035	0.00251033	116.433	33.5277	37.783	5.69492	10.4968	9.06457	0.991622
HexCer(42:1:2)	0.000109264	0.000807937	0.00218146	0.00419924	0.00788599	0.0186268	0.000218527	0.000325403	0.000693543	0.000344946	0.000731914	0.00196081	200	40.2758	31.7927	8.2145	9.28119	10.5268	0.989558
HexCer	0.000293976	0.00285454	0.00816346	0.0156073	0.0283023	0.0641207	0.000371455	0.000789105	0.00255917	0.00107341	0.00286446	0.00606405	126.356	27.6438	31.3491	6.87762	10.1209	9.45726	0.991214
DG(32:1)	0.00355241	0.00661256	0.0137838	0.0280262	0.0450147	0.0753388	0.000287242	0.0011815	0.00310997	0.00153645	0.0101643	0.00225583	8.08582	17.8676	22.5625	5.4822	22.58	2.99424	0.97969
DG(32:0)	0.00331159	0.00460926	0.00965225	0.0170716	0.0318784	0.0624996	0.00070399	0.000803196	0.00355227	0.00268844	0.00652367	0.0073918	21.2583	17.4257	36.8025	15.748	20.4643	11.827	0.982984
DG(34:2)	0.0243664	0.0349163	0.0700362	0.115584	0.152367	0.379751	0.0026345	0.00595334	0.0114253	0.0145669	0.0246559	0.0269353	10.812	17.0503	16.3134	12.6028	16.1819	7.09287	0.98154
DG(34:1)	0.0111138	0.0173418	0.0346753	0.0668859	0.112089	0.204323	0.00189249	0.0014383	0.00532111	0.00982315	0.029471	0.0145289	17.0282	8.29384	15.3455	14.6864	26.2925	7.11075	0.981428
DG(36:2)	0.010876	0.0161435	0.0258039	0.0512237	0.0848983	0.161899	0.000745912	0.000834178	0.0031364	0.00406824	0.01872	0.0126547	6.8583	5.16727	12.1547	7.94211	22.0499	7.8164	0.987162
DG(36:1)	0.0026374	0.00446684	0.0110358	0.0160582	0.0272549	0.0586454	0.000290907	0.000857257	0.00112414	0.00350517	0.00275497	0.00337715	11.0301	19.1916	10.1863	21.828	10.1081	5.75859	0.991222
DG	0.0558576	0.0840903	0.164987	0.29485	0.453502	0.942457	0.00375909	0.00611226	0.021448	0.0261329	0.084833	0.0380737	6.72977	7.26869	12.9998	8.86311	18.7062	4.03983	0.99105
Class
LPC	0.00678042	0.0120661	0.0221482	0.0528002	0.084526	0.130147	0.0011375	0.00163891	0.00508057	0.00239958	0.00740199	0.00625428	16.7763	13.5827	22.939	4.54465	8.75705	4.80554	0.979164
PC	0.383253	0.651819	1.29996	2.7279	5.26544	9.39782	0.0220966	0.0462105	0.242193	0.196185	0.269647	0.508762	5.76554	7.08947	18.6308	7.19181	5.12107	5.41361	0.995369
PC-O*	0.0436837	0.0780481	0.158795	0.327708	0.627539	1.16694	0.00248371	0.0072902	0.039082	0.0191739	0.0385902	0.0765721	5.68566	9.34065	24.6116	5.85091	6.14945	6.56177	0.995414
LPE	0.0128497	0.0204061	0.0406414	0.0813431	0.130253	0.152678	0.00139393	0.00299741	0.00787852	0.00814528	0.01874	0.0385041	10.848	14.6888	19.3854	10.0135	14.3874	25.2192	0.894386
PE	0.167532	0.283698	0.564742	1.19917	2.38512	4.08247	0.0102699	0.0229841	0.0769189	0.0813477	0.115539	0.14069	6.13013	8.10161	13.6202	6.78369	4.84416	3.44621	0.994832
PE-P*	0.0630797	0.109515	0.225429	0.503429	1.02119	1.80497	0.00153674	0.00603566	0.042671	0.0243879	0.0467903	0.0866306	2.43619	5.51126	18.9288	4.84436	4.58195	4.79955	0.995541
LPI	0.00202867	0.00358181	0.00768243	0.0157891	0.0255401	0.0400371	0.0002552	0.000592289	0.00210226	0.00106543	0.00231911	0.00555369	12.5797	16.536	27.3645	6.7479	9.08027	13.8713	0.971796
PI	0.0622972	0.110594	0.219681	0.457036	0.897072	1.59083	0.00380537	0.00660609	0.0391205	0.02598	0.037515	0.0706822	6.10841	5.97329	17.8079	5.68445	4.18194	4.44309	0.996005
PS	0.0634868	0.120253	0.232111	0.49529	0.959204	1.72853	0.0039848	0.0114141	0.041236	0.0289151	0.0509644	0.0622205	6.27658	9.4918	17.7656	5.83802	5.3132	3.59962	0.996627
PG/BMP*	0.00959943	0.0152631	0.0301351	0.0669685	0.121836	0.207727	0.000605212	0.000783394	0.00503171	0.0037872	0.00653758	0.0122898	6.30467	5.13259	16.6971	5.65519	5.36588	5.91633	0.992366
PA	0.00199893	0.00640517	0.0154874	0.0249894	0.0518635	0.0940522	0.000642875	0.0014183	0.00251698	0.00240382	0.00576352	0.0080769	32.161	22.143	16.2518	9.61934	11.1129	8.58768	0.991103
CL	0.0098563	0.0187475	0.0386355	0.0774601	0.161678	0.307182	0.000755721	0.00196628	0.00582895	0.00459025	0.00743241	0.021713	7.66739	10.4882	15.087	5.92595	4.59705	7.06845	0.996286
SM	0.0469381	0.0862272	0.180055	0.356195	0.687439	1.30799	0.00182981	0.00497681	0.0300991	0.0382453	0.0259331	0.0737277	3.89835	5.77174	16.7166	10.7372	3.77243	5.63671	0.996878
Cer	0.00359242	0.00644556	0.0129644	0.0230668	0.0434667	0.0861793	0.000549584	0.00157805	0.00253217	0.000950232	0.00235795	0.00769597	15.2985	24.4827	19.5317	4.11948	5.42474	8.93018	0.994194
HexCer	0.000293976	0.00285454	0.00816346	0.0156073	0.0283023	0.0641207	0.000371455	0.000789105	0.00255917	0.00107341	0.00286446	0.00606405	126.356	27.6438	31.3491	6.87762	10.1209	9.45726	0.991214
DG	0.0558576	0.0840903	0.164987	0.29485	0.453502	0.942457	0.00375909	0.00611226	0.021448	0.0261329	0.084833	0.0380737	6.72977	7.26869	12.9998	8.86311	18.7062	4.03983	0.99105
Membrane lipids	0.87727	1.52592	3.05663	6.42475	12.4905	22.1617	0.0360891	0.109931	0.539681	0.415261	0.601923	1.03535	4.1138	7.2042	17.6561	6.46346	4.81906	4.67182	0.995698
Nr of quantifiable species	95.25	123.5	136	141.5	144	144	2.06155	7.59386	10.8012	1	0	0
Data represent mean ± SD (n = 4). CV%, coefficient of variation, calculated as SD/Mean x 100; green fill indicates CV% < 30. R2, regression coefficient; orange fill indicate R2 > 0.9.
LMD, laser microdissection.
PC and PC-O, diacyl and alkyl-acyl phosphatidylcholine; PE and PE-P, diacyl and alkenyl-acyl phosphatidylethanolamine; PI, phosphatidylinositol; PS, phosphatidylserine; PG, phosphatidylglycerol; BMP, bis(monoacylglycero)phosphate; PA, phosphatidic acid; CL, cardiolipin; LPC, LPE, LPI, and LPS, the corresponding lysolipids;
SM, sphingomyelin; Cer, ceramide; HexCer, hexosylceramide; DG, diacylglycerol.
Membrane lipids were calculated as the sum of glycerophospho- and sphingolipids, i.e., all quantified lipid species, excluding DG.
Sum formulas for glycero(phospho)lipids are defined as the lipid class abbreviation followed by the total number of carbons and total number of double bonds for all chains, e.g. PC(34:1).
Sum formulas for sphingolipids are defined as the lipid class abbreviation followed by the total number of carbons, total number of double bonds and total number of hydroxyl groups in the long chain base and the fatty acyl moiety, e.g. Cer(34:1:2).
* PC/PE-O(x:y), alkyl-acyl and PC/PE-P(x:y-1), alkenyl-acyl species as well as PG and BMP species are isomeric and therefore could not be resolved by the applied shotgun strategy.
For simplicity, for PC/PE, we indicated the more likely annotation based on literature data and our previous works, whereas for PG/BMP, PG or LPG was used in the species list.

## Sheet: S6 HeLa_mol%
Table S6. Compositional data for HeLa 2D cell culture lipidome
	mol% of membrane lipids
LMD area (x1000 µm2)	5	10	20	40	80	160	5	10	20	40	80	160	5	10	20	40	80	160
Lipid species	mean						SD						CV%
LPC(16:0)	0.230277	0.286547	0.269169	0.320586	0.278709	0.221608	0.0502854	0.0442547	0.0353181	0.012428	0.00692014	0.0120651	21.8369	15.4442	13.1212	3.87667	2.48293	5.44434
LPC(18:1)	0.541735	0.504524	0.451616	0.502872	0.397148	0.365665	0.0680264	0.0707563	0.045087	0.0497452	0.0211555	0.00546664	12.5572	14.0244	9.98348	9.89223	5.32686	1.49499
LPC	0.772012	0.79107	0.720785	0.823458	0.675857	0.587273	0.116773	0.0985183	0.0520852	0.0468766	0.0279122	0.00822049	15.1258	12.4538	7.22617	5.69266	4.1299	1.39977
PC(30:1)	1.00323	0.937394	0.967818	1.00053	1.02162	0.951914	0.0744148	0.0555703	0.0700073	0.0362771	0.04141	0.0205104	7.41749	5.92817	7.23353	3.6258	4.05337	2.15465
PC(30:0)	2.65661	2.60902	2.61475	2.65156	2.61054	2.50508	0.156663	0.12521	0.0735304	0.0528837	0.0536445	0.0527172	5.89709	4.79913	2.81214	1.99443	2.05492	2.10441
PC(32:2)	1.14692	1.08492	1.07154	1.04405	1.08939	1.05236	0.0582906	0.0488497	0.0888685	0.0396861	0.0392973	0.0416597	5.08238	4.50261	8.29355	3.80117	3.60728	3.95868
PC(32:1)	10.3509	9.83209	9.79477	9.91219	9.72173	9.4383	0.236686	0.153514	0.438222	0.181559	0.181573	0.0425854	2.28663	1.56136	4.47404	1.83168	1.8677	0.451198
PC(32:0)	2.08278	2.09607	2.07843	2.04592	2.03025	2.01505	0.111603	0.105336	0.143921	0.0555053	0.00914371	0.0627527	5.35835	5.02539	6.9245	2.71297	0.450374	3.1142
PC(34:3)	0.0648031	0.165574	0.195327	0.247777	0.237951	0.228888	0.0915697	0.0523689	0.0593109	0.0169878	0.0122316	0.00505507	141.304	31.6288	30.3649	6.8561	5.14036	2.20853
PC(34:2)	5.57002	5.19861	5.1853	5.10929	5.14971	5.17234	0.26267	0.13948	0.249926	0.118817	0.0547469	0.111263	4.71578	2.68302	4.81989	2.32552	1.06311	2.15111
PC(34:1)	13.3643	12.9905	12.7756	12.6461	12.3932	12.7873	0.265452	0.322623	0.448498	0.151986	0.127628	0.364495	1.98628	2.48354	3.51057	1.20184	1.02983	2.85044
PC(36:5)	0	0.0301212	0.0670626	0.0878008	0.100975	0.101892	0	0.0602424	0.0457476	0.0161602	0.00904288	0.00675669		200	68.2163	18.4055	8.95558	6.63123
PC(36:4)	0.156761	0.328978	0.316974	0.333606	0.333923	0.335291	0.11622	0.136759	0.0239758	0.00774357	0.0119879	0.0202128	74.1385	41.5709	7.56396	2.32117	3.59003	6.02844
PC(36:3)	0.720087	0.691761	0.639108	0.67403	0.652287	0.67795	0.109879	0.0276639	0.018293	0.013462	0.0124919	0.0247771	15.2591	3.99906	2.86227	1.99724	1.91509	3.65471
PC(36:2)	6.10263	5.89283	5.682	5.47533	5.51745	5.73489	0.160063	0.260512	0.208403	0.0549153	0.0177709	0.0723876	2.62286	4.42084	3.66778	1.00296	0.322086	1.26223
PC(36:1)	0.345508	0.381413	0.421444	0.438274	0.416461	0.448454	0.0447258	0.0197984	0.0688861	0.0263373	0.0275593	0.0366698	12.945	5.19081	16.3453	6.00932	6.6175	8.17693
PC(38:6)	0	0.0967834	0.121548	0.176164	0.181085	0.183684	0	0.0689318	0.0810439	0.0134978	0.0171412	0.0159265		71.2227	66.6766	7.66206	9.46582	8.67061
PC(38:5)	0	0.11816	0.177868	0.211233	0.220114	0.234798	0	0.0800524	0.046641	0.0154724	0.0111643	0.0204813		67.7492	26.2222	7.3248	5.07206	8.72297
PC(38:4)	0	0.0272231	0.0454699	0.0770401	0.0759905	0.0893199	0	0.0336359	0.0346017	0.0159786	0.00982957	0.00388604		123.556	76.098	20.7406	12.9353	4.3507
PC(38:3)	0	0.0229457	0.0463476	0.0370815	0.0615596	0.0672098	0	0.0269375	0.0309101	0.0135357	0.00810549	0.0120784		117.397	66.6919	36.5027	13.1669	17.9712
PC(38:2)	0.0996911	0.20179	0.201713	0.226355	0.228619	0.236719	0.0702562	0.0166029	0.0647023	0.0118838	0.00377663	0.0121176	70.4739	8.22781	32.0764	5.25008	1.65193	5.11896
PC(40:7)	0	0.0132292	0.0578469	0.0453439	0.075389	0.0916973	0	0.0264583	0.0388341	0.00492189	0.00534238	0.00505538		200	67.1326	10.8546	7.08642	5.51311
PC(40:6)	0	0	0.0189412	0.00474994	0.0333265	0.0410421	0	0	0.0235267	0.00949988	0.0120129	0.0118303			124.209	200	36.0462	28.8248
PC	43.6642	42.7194	42.4799	42.4444	42.1516	42.3942	0.778255	0.231708	0.589937	0.35658	0.195909	0.340078	1.78236	0.542395	1.38874	0.84011	0.464772	0.802181
PC-O(32:1)	1.3693	1.28802	1.31333	1.28899	1.28203	1.26566	0.151021	0.0687403	0.0923426	0.0491063	0.0303927	0.0378525	11.0291	5.33689	7.0312	3.80968	2.37067	2.99073
PC-O(32:0)	0.960776	1.02411	0.92867	0.928684	0.812338	0.953367	0.0370177	0.042555	0.0366847	0.0367353	0.0297009	0.0465085	3.85289	4.15534	3.95024	3.95562	3.65622	4.87835
PC-O(34:2)	0.700256	0.665864	0.646598	0.626815	0.641338	0.674675	0.0423631	0.020879	0.0519145	0.0109129	0.0137273	0.0246447	6.04966	3.13562	8.02887	1.74101	2.14041	3.65282
PC-O(34:1)	1.67642	1.6088	1.58349	1.55405	1.51748	1.54479	0.185974	0.105292	0.0555293	0.0793023	0.0580248	0.0545962	11.0935	6.54476	3.50676	5.10294	3.82376	3.53421
PC-O(36:5)	0	0	0.0192959	0.00539179	0.0333819	0.0373152	0	0	0.0222959	0.0107836	0.0065856	0.00980521			115.547	200	19.728	26.2767
PC-O(36:4)	0	0.022146	0.049341	0.0635932	0.0701818	0.0763786	0	0.0272735	0.0418117	0.011631	0.00402375	0.0123252		123.153	84.7404	18.2896	5.73333	16.1369
PC-O(36:3)	0	0.108917	0.133168	0.129424	0.138367	0.173149	0	0.0271824	0.0898547	0.00955816	0.0202489	0.00607443		24.9571	67.4746	7.38517	14.6342	3.5082
PC-O(36:2)	0.285796	0.305022	0.330912	0.328357	0.316069	0.324461	0.0675946	0.0184718	0.0508171	0.0201764	0.0082458	0.0133773	23.6513	6.05591	15.3567	6.14465	2.60886	4.12294
PC-O(38:6)	0	0.0322932	0.0700827	0.0921327	0.112934	0.112871	0	0.0376327	0.0472739	0.0150555	0.00793986	0.0117051		116.535	67.4545	16.3411	7.03054	10.3704
PC-O(38:5)	0	0.0555232	0.070448	0.0875163	0.0986315	0.0999756	0	0.039836	0.0476773	0.00665045	0.0115794	0.012099		71.7465	67.6773	7.5991	11.7401	12.102
PC-O*	4.99255	5.11069	5.14534	5.10495	5.02275	5.26264	0.465072	0.173901	0.409795	0.192347	0.137827	0.139108	9.31533	3.4027	7.96439	3.76785	2.74406	2.64332
LPE(16:1)	0.113063	0.130754	0.122638	0.129581	0.0888017	0.0518779	0.0118461	0.0108778	0.0227235	0.0211348	0.00672193	0.0146508	10.4774	8.3193	18.5289	16.3101	7.56959	28.241
LPE(16:0)	0.16697	0.122537	0.108195	0.115491	0.0910527	0.0617361	0.0183025	0.0208091	0.0133644	0.00977437	0.00364647	0.01193	10.9616	16.9819	12.3522	8.46333	4.00479	19.3242
LPE(18:2)	0.0836539	0.0854794	0.0946178	0.0989903	0.0589168	0.0399074	0.00575157	0.00847984	0.0112436	0.0191279	0.00443967	0.0136548	6.87543	9.92033	11.8832	19.323	7.53548	34.2163
LPE(18:1)	0.5612	0.506559	0.492147	0.458237	0.390627	0.277585	0.0970488	0.0749024	0.081229	0.00996968	0.0279284	0.0685421	17.2931	14.7865	16.505	2.17566	7.14964	24.6923
LPE(18:0)	0.144924	0.118436	0.0992413	0.111383	0.0964846	0.0731788	0.0395473	0.0165106	0.00912469	0.00369993	0.00154605	0.0104758	27.2883	13.9406	9.19445	3.32182	1.60238	14.3154
LPE(20:4)	0.219616	0.197802	0.215394	0.164954	0.162097	0.0981435	0.0481271	0.0132295	0.0168643	0.00928209	0.0269852	0.0388645	21.9142	6.68828	7.82949	5.62709	16.6476	39.5997
LPE(22:6)	0.108753	0.0974688	0.118786	0.105039	0.0906341	0.0530163	0.0107537	0.0130717	0.00875121	0.0123678	0.0177473	0.020556	9.88814	13.4112	7.36721	11.7744	19.5812	38.7729
LPE(22:5)	0.0662253	0.0742914	0.0821109	0.0810291	0.0607649	0.0357623	0.0145463	0.0106537	0.0024754	0.00868932	0.0139936	0.0141421	21.9649	14.3405	3.0147	10.7237	23.029	39.5447
LPE	1.46441	1.33333	1.33313	1.2647	1.03938	0.691207	0.139904	0.124136	0.138652	0.0673946	0.0986616	0.179547	9.55362	9.31025	10.4005	5.32888	9.49237	25.9758
PE(32:1)	1.79258	1.65457	1.62171	1.6535	1.7159	1.56618	0.0845823	0.0793806	0.143937	0.0722479	0.0469848	0.0751484	4.71847	4.79766	8.87567	4.36939	2.7382	4.79819
PE(32:0)	0.13732	0.157486	0.153636	0.154211	0.16327	0.152049	0.0201789	0.0183345	0.00531603	0.00687505	0.00606333	0.00466145	14.6948	11.642	3.46015	4.4582	3.71369	3.06576
PE(34:2)	2.45773	2.30957	2.30667	2.24998	2.36006	2.2104	0.203083	0.100665	0.180103	0.0667111	0.0601709	0.0396712	8.26304	4.35861	7.80793	2.96496	2.54955	1.79475
PE(34:1)	4.39719	4.30486	4.20754	4.24959	4.28762	4.12868	0.105235	0.130279	0.184488	0.0996404	0.0587661	0.0803605	2.39323	3.02633	4.3847	2.34471	1.3706	1.9464
PE(36:4)	0.532687	0.501995	0.493821	0.515475	0.525577	0.503407	0.0262802	0.0335101	0.0336967	0.0331773	0.0203094	0.0075088	4.93351	6.67539	6.82367	6.43625	3.86421	1.4916
PE(36:3)	0.720868	0.665597	0.658083	0.685969	0.698397	0.664273	0.0626327	0.0176364	0.0329844	0.017596	0.00978187	0.014992	8.68852	2.64971	5.01219	2.56513	1.40062	2.2569
PE(36:2)	4.62287	4.4375	4.5255	4.3889	4.51779	4.39999	0.148907	0.108717	0.298393	0.125857	0.0606475	0.0513617	3.22109	2.44996	6.59359	2.86761	1.34241	1.16731
PE(36:1)	1.66186	1.59688	1.61194	1.60064	1.58209	1.57186	0.094498	0.0619421	0.0515579	0.0147364	0.016705	0.0245407	5.68628	3.87894	3.1985	0.920659	1.05589	1.56125
PE(38:6)	0.396635	0.387947	0.406913	0.413535	0.429552	0.412451	0.0451356	0.0150113	0.0324556	0.016083	0.017044	0.0121531	11.3796	3.86941	7.97605	3.88915	3.96784	2.94655
PE(38:5)	0.715282	0.672212	0.674461	0.701408	0.723512	0.719841	0.0177984	0.015193	0.0293268	0.0335334	0.0382917	0.0185583	2.48831	2.26015	4.34818	4.78087	5.29248	2.57812
PE(38:4)	0.671073	0.702495	0.692248	0.733354	0.753291	0.749974	0.0447529	0.0413923	0.0379664	0.0151414	0.0147473	0.0302517	6.66886	5.89219	5.48451	2.06467	1.95771	4.0337
PE(38:3)	0.0593099	0.114687	0.131381	0.146123	0.148156	0.146988	0.0445834	0.0235413	0.0163346	0.00907815	0.00555676	0.00759364	75.1703	20.5266	12.4329	6.21268	3.75061	5.16617
PE(38:2)	0.281833	0.303063	0.281144	0.296778	0.301872	0.309356	0.0155768	0.0182634	0.0228001	0.0148033	0.00762798	0.00396641	5.52695	6.02627	8.10975	4.98801	2.52689	1.28215
PE(38:1)	0	0.00726532	0.0213996	0.0230307	0.0324269	0.0322679	0	0.0145306	0.0154483	0.00422239	0.0053322	0.00991452		200	72.1896	18.3338	16.4438	30.7256
PE(40:7)	0.213504	0.271207	0.263659	0.286336	0.287764	0.278997	0.0123989	0.00978837	0.0137546	0.00733009	0.0121055	0.0178102	5.80733	3.60918	5.21681	2.55996	4.20674	6.38365
PE(40:6)	0.419265	0.428469	0.44586	0.471963	0.470897	0.481411	0.0273083	0.00490145	0.0247506	0.00892912	0.0111969	0.0126465	6.51339	1.14395	5.55121	1.89191	2.37778	2.62697
PE(40:5)	0.00609985	0.0682883	0.0820146	0.0921532	0.0987373	0.101504	0.00311399	0.0285938	0.0189637	0.0075074	0.00589227	0.0105471	51.0502	41.8722	23.1223	8.14666	5.96762	10.3909
PE	19.0861	18.5841	18.578	18.6629	19.0969	18.4296	0.486358	0.270664	0.800608	0.288767	0.259018	0.242349	2.54823	1.45643	4.30945	1.54727	1.35633	1.315
PE-P(34:2)	0.472088	0.389776	0.414771	0.426918	0.448424	0.427814	0.0185032	0.0222754	0.0249978	0.023114	0.00979034	0.0205423	3.91945	5.71491	6.02689	5.41415	2.18328	4.8017
PE-P(34:1)	1.89652	1.74466	1.73797	1.82592	1.86536	1.80027	0.119723	0.0659279	0.0460297	0.0946958	0.0379065	0.033279	6.31276	3.77883	2.64848	5.18621	2.03212	1.84856
PE-P(34:0)	0	0.0851625	0.0846192	0.0955291	0.0955692	0.0946552	0	0.0195562	0.0122376	0.00365151	0.00457255	0.00552943		22.9634	14.462	3.8224	4.78454	5.84166
PE-P(36:5)	0.193896	0.246565	0.255459	0.250144	0.246135	0.264571	0.0386216	0.0196377	0.0221714	0.0104674	0.0086391	0.021377	19.9188	7.9645	8.67907	4.18457	3.50991	8.07987
PE-P(36:4)	1.14889	1.0448	1.0607	1.19301	1.26065	1.19242	0.0463446	0.0457809	0.0343384	0.0368779	0.0521223	0.0661241	4.03384	4.38178	3.23735	3.09116	4.13455	5.54535
PE-P(36:3)	0.213067	0.248029	0.266284	0.296407	0.300031	0.29313	0.0340648	0.00588982	0.0143595	0.0242408	0.00798202	0.00874989	15.9878	2.37465	5.39254	8.17824	2.6604	2.98499
PE-P(36:2)	0.908609	0.808392	0.810663	0.860326	0.898044	0.871157	0.0594291	0.0300496	0.0441721	0.063841	0.0215495	0.00757194	6.54067	3.7172	5.44889	7.42056	2.3996	0.869182
PE-P(36:1)	0.433064	0.419684	0.421389	0.438266	0.443263	0.442444	0.0817804	0.027248	0.0110928	0.0235859	0.00858959	0.0104079	18.8841	6.49251	2.63243	5.38164	1.93781	2.35236
PE-P(36:0)	0	0.0257098	0.0373301	0.047387	0.0477961	0.044421	0	0.0172102	0.025501	0.00632444	0.00117504	0.00918905		66.94	68.3122	13.3463	2.45844	20.6863
PE-P(38:6)	0.622712	0.63313	0.645149	0.694283	0.748038	0.758148	0.0479011	0.023015	0.0377692	0.0297773	0.0236178	0.0247127	7.69233	3.63512	5.85434	4.28893	3.1573	3.25961
PE-P(38:5)	0.83171	0.839379	0.83649	0.887307	0.91297	0.948066	0.0646895	0.0286882	0.0337096	0.0500734	0.020902	0.0456117	7.77789	3.41779	4.02989	5.64331	2.28945	4.81103
PE-P(38:4)	0.411037	0.413512	0.415716	0.458224	0.479376	0.471299	0.05395	0.018709	0.0210568	0.0179898	0.0129297	0.0241836	13.1253	4.52441	5.06519	3.92599	2.69719	5.13126
PE-P(40:7)	0.0733102	0.161772	0.176454	0.191597	0.215357	0.224921	0.0518331	0.0081709	0.0202944	0.0156079	0.00547755	0.0164496	70.7038	5.05087	11.5012	8.14623	2.54347	7.3135
PE-P(40:6)	0	0.0884598	0.128606	0.0960501	0.120586	0.19965	0	0.0641295	0.0490391	0.0149864	0.0289475	0.0339932		72.4957	38.1313	15.6027	24.0057	17.0264
PE-P(40:5)	0	0.0341986	0.0655851	0.0761233	0.0815015	0.100243	0	0.0408025	0.0455565	0.00994611	0.00247913	0.0176777		119.31	69.4616	13.0658	3.04182	17.6349
PE-P(40:4)	0	0	0.00445418	0.00988104	0.0139101	0.0144693	0	0	0.00514471	0.00117999	0.00333017	0.00416588			115.503	11.9419	23.9406	28.7912
PE-P*	7.20491	7.18323	7.36163	7.84737	8.17702	8.14769	0.472958	0.12371	0.339921	0.36335	0.112775	0.262541	6.56439	1.7222	4.61747	4.63021	1.37918	3.22228
LPI(18:1)	0.164598	0.141627	0.168069	0.151721	0.118697	0.114808	0.00657981	0.0319772	0.0181223	0.0110068	0.00704173	0.0245006	3.9975	22.5784	10.7826	7.25465	5.93252	21.3405
LPI(18:0)	0.0668508	0.092611	0.080071	0.0946527	0.0856527	0.0668842	0.0228627	0.0105843	0.0164637	0.0099906	0.00655034	0.00885304	34.1996	11.4288	20.5613	10.555	7.64756	13.2364
LPI	0.231449	0.234238	0.24814	0.246374	0.20435	0.181692	0.0291638	0.031541	0.0325921	0.0207299	0.0135122	0.0328138	12.6005	13.4653	13.1346	8.41403	6.61229	18.0601
PI(34:2)	0.819969	0.749455	0.743478	0.730305	0.759743	0.710303	0.026152	0.0708143	0.0587952	0.0244154	0.0112947	0.021004	3.18939	9.44877	7.90813	3.34318	1.48665	2.95705
PI(34:0)	0	0.0037331	0.017563	0.0321298	0.0336083	0.0367577	0	0.00746621	0.0119329	0.00462153	0.00163048	0.00167384		200	67.9434	14.3839	4.85142	4.55371
PI(36:4)	0	0.0475525	0.0606906	0.0864526	0.0873339	0.076369	0	0.0238317	0.0148868	0.00517636	0.00326398	0.00356436		50.1166	24.529	5.98751	3.73735	4.66729
PI(36:3)	0.200453	0.20613	0.199743	0.200279	0.204614	0.197228	0.00927547	0.0171829	0.00309368	0.00537326	0.0110778	0.0100778	4.62725	8.33593	1.54884	2.68288	5.41398	5.10973
PI(36:2)	2.5395	2.46365	2.46064	2.39779	2.40819	2.37351	0.215942	0.139803	0.0911224	0.091115	0.0774313	0.0326197	8.50332	5.67464	3.7032	3.79995	3.21533	1.37432
PI(36:1)	1.77762	1.82398	1.77248	1.73839	1.73744	1.79454	0.14004	0.10304	0.0597075	0.0407938	0.0423751	0.0340825	7.87793	5.64917	3.36859	2.34664	2.43894	1.89923
PI(38:5)	0.398988	0.43257	0.423385	0.441797	0.442335	0.444187	0.140343	0.0346541	0.0164719	0.0244373	0.0200309	0.0290993	35.1748	8.01121	3.89053	5.53135	4.52845	6.55115
PI(38:4)	0.870479	0.914008	0.900524	0.906904	0.923714	0.927928	0.0550025	0.0589737	0.00874104	0.0534875	0.0293794	0.0396515	6.31865	6.45221	0.970662	5.89782	3.18057	4.27312
PI(38:2)	0.496261	0.476973	0.444999	0.410208	0.415589	0.437578	0.0349079	0.0289283	0.0174683	0.0075437	0.0110973	0.0105832	7.03418	6.06497	3.92546	1.83899	2.67025	2.41858
PI(40:6)	0	0.0779943	0.0857965	0.0851569	0.0891338	0.0941913	0	0.00983002	0.00372899	0.00465147	0.00335001	0.00500963		12.6035	4.34632	5.46224	3.75841	5.31857
PI(40:5)	0	0.0587507	0.0799244	0.0877933	0.0837087	0.086355	0	0.0130812	0.00948384	0.00643467	0.00465905	0.00404095		22.2657	11.866	7.32934	5.56579	4.67946
PI	7.10327	7.2548	7.18922	7.11721	7.18541	7.17894	0.36798	0.250498	0.14391	0.128681	0.194108	0.0291522	5.18043	3.45286	2.00174	1.80803	2.70141	0.406079
PS(34:1)	2.77201	2.97848	2.82477	2.85902	2.86461	2.85923	0.18091	0.0958846	0.0809747	0.0544996	0.0554458	0.0986567	6.52632	3.21924	2.8666	1.90623	1.93554	3.45046
PS(36:2)	1.68562	1.60142	1.45514	1.36071	1.38417	1.42305	0.100877	0.0674462	0.0919884	0.0135057	0.0223979	0.0541126	5.98458	4.21164	6.32164	0.992549	1.61815	3.80259
PS(36:1)	2.57825	2.71709	2.65855	2.67371	2.59647	2.66676	0.139414	0.209364	0.0416936	0.0532614	0.0638826	0.0150878	5.40732	7.70547	1.56828	1.99204	2.46036	0.565772
PS(38:4)	0	0.0539551	0.0770106	0.0972287	0.0972578	0.0997527	0	0.0156161	0.0165792	0.00890495	0.00325502	0.00250042		28.9428	21.5285	9.15877	3.3468	2.50662
PS(38:3)	0	0.0904347	0.0736127	0.10761	0.106786	0.106059	0	0.0102141	0.0499996	0.00573439	0.00198163	0.00563079		11.2944	67.9225	5.32889	1.85571	5.30912
PS(38:2)	0.155125	0.212357	0.194754	0.19657	0.206618	0.212839	0.031881	0.0362935	0.0153809	0.0140106	0.00252791	0.00686429	20.5518	17.0908	7.89762	7.12754	1.22347	3.22511
PS(38:1)	0	0.100322	0.103378	0.123796	0.11952	0.118854	0	0.0233285	0.0284097	0.00583378	0.00239574	0.00394625		23.2537	27.4814	4.71242	2.00446	3.32024
PS(40:6)	0	0	0.0290679	0.0743431	0.0754676	0.0827309	0	0	0.0365367	0.0226267	0.0183191	0.0196718			125.694	30.4354	24.2741	23.778
PS(40:4)	0	0	0.0173558	0.0264196	0.0307689	0.0330939	0	0	0.0125611	0.00361431	0.00141085	0.00341021			72.3744	13.6804	4.58532	10.3046
PS(40:3)	0	0	0.00631802	0.00835709	0.0147199	0.0127177	0	0	0.00732789	0.00573762	0.00206997	0.00493158			115.984	68.6557	14.0624	38.7774
PS(40:2)	0.043267	0.117221	0.120124	0.125069	0.131719	0.141751	0.0499722	0.031095	0.0161275	0.00711658	0.00510919	0.00893752	115.497	26.5269	13.4257	5.69014	3.87887	6.30509
PS(40:1)	0	0.00565414	0.0312315	0.0587511	0.0507116	0.0462496	0	0.0113083	0.0230201	0.00706303	0.00513782	0.0106449		200	73.7079	12.0219	10.1315	23.0161
PS	7.23426	7.87694	7.59131	7.71158	7.67882	7.80308	0.251474	0.409228	0.0988111	0.0635967	0.142165	0.124153	3.47616	5.19526	1.30164	0.824691	1.85139	1.59107
PG(34:2)	0.147882	0.119229	0.112205	0.121989	0.113196	0.101751	0.0166707	0.0105554	0.00413976	0.0081916	0.0063919	0.0108244	11.273	8.85307	3.68946	6.71502	5.64677	10.6381
PG(34:1)	0.420676	0.376902	0.380504	0.372374	0.358809	0.364263	0.0274365	0.0261834	0.00525542	0.00719453	0.0147872	0.00391846	6.52199	6.947	1.38117	1.93207	4.12118	1.07572
PG(36:3)	0	0.0293248	0.0316992	0.0404981	0.0387235	0.0333797	0	0.00900336	0.00752747	0.00576566	0.00192636	0.00391425		30.7022	23.7466	14.2368	4.97464	11.7265
PG(36:2)	0.398764	0.329137	0.303508	0.344593	0.314136	0.281054	0.0138934	0.0394834	0.00423211	0.0387827	0.0152931	0.0232256	3.48411	11.996	1.3944	11.2546	4.86833	8.26373
PG(36:1)	0.126917	0.108055	0.10094	0.101322	0.0896688	0.0953619	0.0187008	0.0117242	0.0182052	0.00521032	0.00461077	0.00499607	14.7347	10.8502	18.0356	5.14236	5.142	5.23906
PG(38:3)	0	0.00339663	0.0133732	0.011323	0.0120839	0.0150988	0	0.00679326	0.00556817	0.00123985	0.00221684	0.008588		200	41.6367	10.9498	18.3453	56.8786
PG(40:7)	0	0.0373223	0.0450794	0.0520934	0.0490021	0.0464251	0	0.00949981	0.00537529	0.00490098	0.00207739	0.00413257		25.4534	11.9241	9.40807	4.2394	8.9016
PG*	1.09424	1.00337	0.987309	1.04419	0.975619	0.937333	0.0514153	0.0773095	0.0127281	0.0612103	0.0335677	0.0348495	4.69873	7.70502	1.28917	5.86197	3.44065	3.71794
PA(32:1)	0.0609106	0.0723948	0.0985023	0.0820819	0.0878224	0.0913386	0.00537725	0.0192903	0.0174128	0.00776243	0.0122888	0.00587978	8.82811	26.6459	17.6776	9.45693	13.9928	6.43734
PA(32:0)	0	0.0405411	0.0420841	0.0364702	0.0362183	0.0396116	0	0.0140016	0.00956716	0.0061974	0.00501858	0.00448536		34.5369	22.7334	16.9931	13.8565	11.3234
PA(34:2)	0.034393	0.0625669	0.0717766	0.049804	0.054689	0.0557116	0.0406108	0.0226761	0.0120217	0.00349207	0.0109716	0.0019503	118.079	36.243	16.7488	7.01163	20.0619	3.50071
PA(34:1)	0.131787	0.152165	0.172653	0.134485	0.146619	0.145817	0.0537977	0.0220894	0.0217321	0.00578468	0.0150644	0.0101724	40.8216	14.5167	12.5872	4.30136	10.2746	6.97612
PA(36:2)	0	0.0613155	0.078201	0.0540568	0.0621825	0.0617127	0	0.0164864	0.00992068	0.00353126	0.00881159	0.00162189		26.8878	12.6861	6.53249	14.1705	2.62813
PA(36:1)	0	0.0293331	0.0467266	0.031772	0.0284613	0.0297032	0	0.00439424	0.0127582	0.0049922	0.00058691	0.00518403		14.9805	27.3039	15.7126	2.06213	17.4528
PA	0.227091	0.418317	0.509943	0.38867	0.415992	0.423895	0.0688208	0.0788938	0.0489295	0.0211285	0.05105	0.0198086	30.3054	18.8598	9.59508	5.4361	12.2719	4.673
CL(68:6)	0	0	0.0187588	0.0349357	0.0391136	0.0384423	0	0	0.0137453	0.00310678	0.00343867	0.0104842			73.274	8.89286	8.79148	27.2725
CL(68:5)	0.220859	0.238437	0.234378	0.212613	0.227729	0.237146	0.0268699	0.00621181	0.0267321	0.00811911	0.0129984	0.00432799	12.1661	2.60522	11.4056	3.81872	5.70782	1.82503
CL(68:4)	0.412781	0.389205	0.387036	0.350859	0.385004	0.400018	0.0358606	0.0296673	0.0197405	0.0166429	0.0210997	0.0123686	8.68756	7.62253	5.10042	4.74348	5.48039	3.09202
CL(70:7)	0	0	0.0136062	0.0238057	0.0253297	0.0259002	0	0	0.00961585	0.00168468	0.00354492	0.00412707			70.6725	7.07678	13.9951	15.9345
CL(70:6)	0.0675018	0.102915	0.0872485	0.0894469	0.0916126	0.107356	0.00877215	0.00516273	0.0121943	0.00390227	0.00294843	0.00631874	12.9954	5.01649	13.9765	4.36267	3.21837	5.8858
CL(70:5)	0.250181	0.259556	0.268606	0.251385	0.265778	0.283319	0.0300194	0.00928664	0.010971	0.0143255	0.0195923	0.00543389	11.9991	3.57789	4.08442	5.69862	7.37166	1.91794
CL(70:4)	0.1714	0.174414	0.180485	0.159191	0.167169	0.188781	0.0321976	0.016208	0.0244422	0.00477293	0.004319	0.0173074	18.785	9.29288	13.5425	2.99824	2.58362	9.16797
CL(72:8)	0	0	0	0.00221134	0.0104974	0.012107	0	0	0	0.00442268	0.00188959	0.00318576				200	18.0006	26.3133
CL(72:7)	0	0	0.0200232	0.0239776	0.0249599	0.0273655	0	0	0.00718306	0.00599371	0.00268069	0.00186188			35.8737	24.9971	10.74	6.80375
CL(72:6)	0	0.0622292	0.0588313	0.0578962	0.0577782	0.0645913	0	0.00378525	0.00625838	0.00340877	0.00132133	0.00874263		6.08275	10.6378	5.88773	2.2869	13.5353
CL	1.12272	1.22676	1.26897	1.20632	1.29497	1.38503	0.0545007	0.045107	0.0618597	0.0320073	0.0411298	0.0398774	4.85434	3.67693	4.87479	2.65329	3.17611	2.87918
SM(32:1:2)	0.0980495	0.172128	0.17578	0.181266	0.175958	0.206188	0.0183879	0.0116965	0.0458328	0.0109052	0.021347	0.0196636	18.7537	6.79526	26.0739	6.01616	12.1319	9.53674
SM(34:1:2)	2.08881	2.14935	2.19014	2.05789	2.00447	2.0935	0.196127	0.0724192	0.0987886	0.117945	0.0336052	0.0300912	9.38941	3.36936	4.5106	5.73138	1.67652	1.43736
SM(36:1:2)	0.329446	0.368944	0.360702	0.329415	0.334012	0.369581	0.0549652	0.0114318	0.0502636	0.0159117	0.0113403	0.0267414	16.6841	3.09853	13.9349	4.8303	3.39517	7.23559
SM(40:2:2)	0.246466	0.304833	0.305642	0.296553	0.298412	0.305928	0.0170634	0.036668	0.0182302	0.0168369	0.00947366	0.00861871	6.92321	12.0289	5.96455	5.67754	3.17469	2.81723
SM(40:1:2)	0.261332	0.339116	0.363668	0.341114	0.351656	0.389788	0.0999178	0.0309844	0.03369	0.0385674	0.0223225	0.0212604	38.2341	9.13684	9.26393	11.3063	6.34783	5.45435
SM(41:1:2)	0	0.00391862	0.0461396	0.0495473	0.0467048	0.0534299	0	0.00783724	0.0119619	0.0109739	0.0085798	0.00843351		200	25.9254	22.1482	18.3703	15.7842
SM(42:3:2)	0.407082	0.417091	0.432709	0.401741	0.422419	0.449489	0.0536814	0.0480231	0.0446168	0.0197064	0.0154103	0.0314571	13.1869	11.5138	10.311	4.90526	3.64811	6.9984
SM(42:2:2)	1.31439	1.35557	1.48016	1.43707	1.49764	1.56236	0.099017	0.0951667	0.0843724	0.100417	0.0661755	0.0852031	7.53332	7.02042	5.70023	6.9876	4.41865	5.45349
SM(42:1:2)	0.613443	0.544641	0.544643	0.440087	0.375141	0.469697	0.0321988	0.0778133	0.0747681	0.0101817	0.0173053	0.0281335	5.24886	14.2871	13.7279	2.31358	4.61301	5.98971
SM	5.35902	5.65559	5.89959	5.53468	5.50641	5.89996	0.341306	0.126644	0.174525	0.288002	0.112936	0.0617728	6.36881	2.23928	2.95825	5.20358	2.051	1.047
Cer(34:1:2)	0.0779981	0.0612255	0.0552563	0.0470315	0.0415313	0.0434695	0.0222736	0.000766556	0.00335374	0.00842155	0.00126168	0.00331633	28.5565	1.25202	6.06943	17.9062	3.0379	7.62909
Cer(36:1:2)	0	0.00880938	0.0149639	0.0128629	0.0115631	0.0107886	0	0.0102203	0.00429265	0.00556945	0.00132645	0.00108353		116.016	28.6867	43.2987	11.4714	10.0433
Cer(40:1:2)	0.0439534	0.046004	0.0373163	0.0320713	0.0299587	0.0341593	0.0207334	0.0158156	0.00423743	0.0047217	0.00198481	0.0036393	47.1714	34.3787	11.3555	14.7225	6.62514	10.6539
Cer(41:1:2)	0.0327662	0.020218	0.0212256	0.0173558	0.0176389	0.0175962	0.00868885	0.00837793	0.00515064	0.00402385	0.00152744	0.00124179	26.5178	41.4379	24.2662	23.1845	8.65947	7.05713
Cer(42:3:2)	0	0.0186176	0.0381398	0.0337123	0.0321517	0.0371539	0	0.0221601	0.00395774	0.00177714	0.00255805	0.00423772		119.028	10.3769	5.27149	7.95617	11.4058
Cer(42:2:2)	0.123765	0.137733	0.151594	0.129584	0.129807	0.144217	0.0226681	0.0157193	0.00897535	0.0045247	0.00581735	0.00664742	18.3154	11.4129	5.92065	3.49171	4.48153	4.60931
Cer(42:1:2)	0.130766	0.127511	0.106227	0.0876312	0.0855181	0.101175	0.0181831	0.0148501	0.00869726	0.00763261	0.00469592	0.0118474	13.9051	11.6461	8.18742	8.70993	5.49114	11.7098
Cer	0.409249	0.420118	0.424723	0.360249	0.348169	0.38856	0.0578645	0.0827557	0.0343342	0.0297745	0.0155727	0.0228791	14.1392	19.6982	8.08391	8.26497	4.47275	5.88817
HexCer(34:1:2)	0	0.0114851	0.0311384	0.0299327	0.0263579	0.0320959	0	0.0133019	0.00461268	0.00180922	0.00331931	0.00276363		115.819	14.8135	6.0443	12.5932	8.61054
HexCer(40:1:2)	0	0.0365786	0.0494744	0.0425808	0.0372613	0.0479787	0	0.007529	0.00552573	0.000853016	0.00435684	0.00423873		20.5831	11.1689	2.00329	11.6927	8.8346
HexCer(42:2:2)	0.0212792	0.086913	0.111484	0.105063	0.0999821	0.124806	0.0246206	0.0291243	0.0294851	0.00298238	0.010029	0.00693023	115.703	33.5097	26.448	2.83866	10.0308	5.55282
HexCer(42:1:2)	0.0132325	0.0530751	0.0699465	0.0653131	0.0631719	0.0839637	0.026465	0.0223474	0.0128945	0.00171435	0.00565018	0.00639678	200	42.1052	18.4347	2.62481	8.94413	7.6185
HexCer	0.0345117	0.188052	0.262043	0.24289	0.226773	0.288844	0.0446091	0.0565753	0.044314	0.00395701	0.0228922	0.0146955	129.258	30.085	16.911	1.62914	10.0948	5.08769
DG(32:1)	0.405808	0.432707	0.45081	0.437663	0.358382	0.340315	0.0411082	0.0660118	0.0500546	0.0389401	0.0654419	0.0131767	10.13	15.2555	11.1033	8.89727	18.2604	3.87191
DG(32:0)	0.380355	0.302721	0.312474	0.267432	0.254675	0.283565	0.0967432	0.0555347	0.0734191	0.051539	0.0484174	0.047486	25.435	18.3452	23.4961	19.2718	19.0114	16.7461
DG(34:2)	2.79011	2.29458	2.31474	1.80206	1.2163	1.71768	0.421388	0.418554	0.343992	0.235537	0.149461	0.167191	15.1029	18.241	14.8609	13.0704	12.2882	9.73354
DG(34:1)	1.27231	1.13639	1.13978	1.03936	0.891925	0.924076	0.246548	0.0449043	0.0738587	0.117304	0.203357	0.0873299	19.378	3.95149	6.48011	11.2862	22.7997	9.45051
DG(36:2)	1.24011	1.05907	0.850607	0.798648	0.675841	0.732455	0.0737766	0.0223008	0.0484423	0.0640394	0.115217	0.0761311	5.9492	2.10569	5.69502	8.01848	17.048	10.394
DG(36:1)	0.3001	0.291056	0.365127	0.252438	0.217922	0.265162	0.0230054	0.0342893	0.0341243	0.0694001	0.0153181	0.0213484	7.66593	11.781	9.34588	27.492	7.0292	8.05107
DG	6.38879	5.51653	5.43353	4.5976	3.61504	4.26325	0.704425	0.307957	0.322962	0.433394	0.521195	0.338627	11.026	5.58245	5.94387	9.42652	14.4174	7.94293
Class
LPC	0.772012	0.79107	0.720785	0.823458	0.675857	0.587273	0.116773	0.0985183	0.0520852	0.0468766	0.0279122	0.00822049	15.1258	12.4538	7.22617	5.69266	4.1299	1.39977
PC	43.6642	42.7194	42.4799	42.4444	42.1516	42.3942	0.778255	0.231708	0.589937	0.35658	0.195909	0.340078	1.78236	0.542395	1.38874	0.84011	0.464772	0.802181
PC-O*	4.99255	5.11069	5.14534	5.10495	5.02275	5.26264	0.465072	0.173901	0.409795	0.192347	0.137827	0.139108	9.31533	3.4027	7.96439	3.76785	2.74406	2.64332
LPE	1.46441	1.33333	1.33313	1.2647	1.03938	0.691207	0.139904	0.124136	0.138652	0.0673946	0.0986616	0.179547	9.55362	9.31025	10.4005	5.32888	9.49237	25.9758
PE	19.0861	18.5841	18.578	18.6629	19.0969	18.4296	0.486358	0.270664	0.800608	0.288767	0.259018	0.242349	2.54823	1.45643	4.30945	1.54727	1.35633	1.315
PE-P*	7.20491	7.18323	7.36163	7.84737	8.17702	8.14769	0.472958	0.12371	0.339921	0.36335	0.112775	0.262541	6.56439	1.7222	4.61747	4.63021	1.37918	3.22228
LPI	0.231449	0.234238	0.24814	0.246374	0.20435	0.181692	0.0291638	0.031541	0.0325921	0.0207299	0.0135122	0.0328138	12.6005	13.4653	13.1346	8.41403	6.61229	18.0601
PI	7.10327	7.2548	7.18922	7.11721	7.18541	7.17894	0.36798	0.250498	0.14391	0.128681	0.194108	0.0291522	5.18043	3.45286	2.00174	1.80803	2.70141	0.406079
PS	7.23426	7.87694	7.59131	7.71158	7.67882	7.80308	0.251474	0.409228	0.0988111	0.0635967	0.142165	0.124153	3.47616	5.19526	1.30164	0.824691	1.85139	1.59107
PG/BMP*	1.09424	1.00337	0.987309	1.04419	0.975619	0.937333	0.0514153	0.0773095	0.0127281	0.0612103	0.0335677	0.0348495	4.69873	7.70502	1.28917	5.86197	3.44065	3.71794
PA	0.227091	0.418317	0.509943	0.38867	0.415992	0.423895	0.0688208	0.0788938	0.0489295	0.0211285	0.05105	0.0198086	30.3054	18.8598	9.59508	5.4361	12.2719	4.673
CL	1.12272	1.22676	1.26897	1.20632	1.29497	1.38503	0.0545007	0.045107	0.0618597	0.0320073	0.0411298	0.0398774	4.85434	3.67693	4.87479	2.65329	3.17611	2.87918
SM	5.35902	5.65559	5.89959	5.53468	5.50641	5.89996	0.341306	0.126644	0.174525	0.288002	0.112936	0.0617728	6.36881	2.23928	2.95825	5.20358	2.051	1.047
Cer	0.409249	0.420118	0.424723	0.360249	0.348169	0.38856	0.0578645	0.0827557	0.0343342	0.0297745	0.0155727	0.0228791	14.1392	19.6982	8.08391	8.26497	4.47275	5.88817
HexCer	0.0345117	0.188052	0.262043	0.24289	0.226773	0.288844	0.0446091	0.0565753	0.044314	0.00395701	0.0228922	0.0146955	129.258	30.085	16.911	1.62914	10.0948	5.08769
DG	6.38879	5.51653	5.43353	4.5976	3.61504	4.26325	0.704425	0.307957	0.322962	0.433394	0.521195	0.338627	11.026	5.58245	5.94387	9.42652	14.4174	7.94293
Membrane lipids	100	100	100	100	100	100	1.42109e-14	3.84832e-14	2.00972e-14	2.00972e-14	2.17074e-14	2.59454e-14
Data represent mean ± SD (n = 4). CV%, coefficient of variation, calculated as SD/Mean x 100; green fill indicates CV% < 30.
LMD, laser microdissection.
PC and PC-O, diacyl and alkyl-acyl phosphatidylcholine; PE and PE-P, diacyl and alkenyl-acyl phosphatidylethanolamine; PI, phosphatidylinositol; PS, phosphatidylserine; PG, phosphatidylglycerol; BMP, bis(monoacylglycero)phosphate; PA, phosphatidic acid; CL, cardiolipin; LPC, LPE, LPI, and LPS, the corresponding lysolipids;
SM, sphingomyelin; Cer, ceramide; HexCer, hexosylceramide; DG, diacylglycerol.
Membrane lipids were calculated as the sum of glycerophospho- and sphingolipids, i.e., all quantified lipid species, excluding DG.
Sum formulas for glycero(phospho)lipids are defined as the lipid class abbreviation followed by the total number of carbons and total number of double bonds for all chains, e.g. PC(34:1).
Sum formulas for sphingolipids are defined as the lipid class abbreviation followed by the total number of carbons, total number of double bonds and total number of hydroxyl groups in the long chain base and the fatty acyl moiety, e.g. Cer(34:1:2).
* PC/PE-O(x:y), alkyl-acyl and PC/PE-P(x:y-1), alkenyl-acyl species as well as PG and BMP species are isomeric and therefore could not be resolved by the applied shotgun strategy.
For simplicity, for PC/PE, we indicated the more likely annotation based on literature data and our previous works, whereas for PG/BMP, PG or LPG was used in the species list.

## Sheet: S7 Hippocampus_mol%
Table S7. Compositional data for the mouse hippocampus lipidome
	mol% of membrane lipids
ROI	1	2	3	4	5	6	7	8	9	10	11	1	2	3	4	5	6	7	8	9	10	11	1	2	3	4	5	6	7	8	9	10	11
Lipid species	mean											SD											CV%
LPC(16:0)	0.218847	0.272689	0.232788	0.251794	0.233873	0.259787	0.189386	0.187566	0.257118	0.210004	0.21791	0.0256125	0.0641861	0.0131289	0.0354037	0.021416	0.0280854	0.0373746	0.0299714	0.037716	0.0228402	0.0294453	11.7034	23.5382	5.63986	14.0606	9.15711	10.8109	19.7345	15.9791	14.6688	10.8761	13.5126
LPC(18:1)	0.112483	0.147837	0.130343	0.139198	0.126894	0.154115	0.0958783	0.0770826	0.0993956	0.0863366	0.0909572	0.0072566	0.0416864	0.0107974	0.00609698	0.0155365	0.0146077	0.0116703	0.0130503	0.0135078	0.00675263	0.0118569	6.45127	28.1975	8.28386	4.38009	12.2436	9.47844	12.172	16.9303	13.59	7.82128	13.0357
LPC(18:0)	0.0773044	0.098492	0.078644	0.0805848	0.0745595	0.0994206	0.0449335	0.0685698	0.0711339	0.0567042	0.0623038	0.00247331	0.0280805	0.00412714	0.0124534	0.00612632	0.00578326	0.00100881	0.01171	0.0117785	0.0074444	0.0168406	3.19944	28.5104	5.24788	15.4538	8.21668	5.81696	2.24512	17.0775	16.5582	13.1285	27.0298
LPC	0.408635	0.519018	0.441775	0.471576	0.435327	0.513322	0.330198	0.333219	0.427647	0.353044	0.371171	0.03368	0.131743	0.0212529	0.0437815	0.0370495	0.0468157	0.0476346	0.0540885	0.0625038	0.0356823	0.0575077	8.24209	25.3831	4.8108	9.28407	8.51072	9.12014	14.4261	16.2321	14.6157	10.107	15.4936
PC(30:0)	0.105535	0.0992913	0.0845971	0.0892092	0.0894805	0.0741083	0.0822661	0.100779	0.0940429	0.0862045	0.0869714	0.011074	0.00897441	0.00361934	0.0103917	0.00287571	0.00161047	0.00303921	0.0126506	0.00291455	0.00224472	0.00294725	10.4932	9.03847	4.27832	11.6486	3.21378	2.17313	3.69436	12.5528	3.09917	2.60395	3.38876
PC(32:1)	0.516568	0.629929	0.444036	0.484465	0.530306	0.478448	0.455089	0.390343	0.451223	0.421003	0.398187	0.0699342	0.0585865	0.105697	0.0178441	0.022832	0.036822	0.0315318	0.0448016	0.0368391	0.048131	0.0500424	13.5382	9.30049	23.8037	3.68325	4.30543	7.69613	6.92871	11.4775	8.16427	11.4325	12.5676
PC(32:0)	10.8024	9.21565	9.27883	9.52394	9.42763	7.00154	11.2379	10.2063	10.8418	10.7936	10.6921	0.341719	0.459753	0.192528	0.326821	0.499521	0.4524	0.532775	0.756907	0.185141	0.779474	0.326019	3.16336	4.98883	2.07492	3.43157	5.29848	6.46143	4.74088	7.41607	1.70765	7.22161	3.04915
PC(34:2)	0.648189	0.694646	0.564756	0.504002	0.551538	0.60819	0.407502	0.402372	0.371126	0.378588	0.408629	0.054458	0.0626191	0.0123358	0.05498	0.063017	0.0278194	0.0344938	0.04001	0.0251851	0.0172025	0.0164695	8.40155	9.01454	2.18427	10.9087	11.4257	4.57412	8.46468	9.94352	6.78613	4.54385	4.03044
PC(34:1)	13.571	13.1211	13.4923	13.4206	13.676	13.4569	12.8586	13.0552	12.9103	12.8652	13.011	0.230041	0.331667	0.151369	0.244455	0.513294	0.355437	0.789108	1.23154	0.249919	0.223478	0.166232	1.69509	2.52774	1.1219	1.82149	3.75324	2.6413	6.13682	9.43334	1.93581	1.73708	1.27763
PC(34:0)	1.53337	1.34491	1.67426	1.72499	1.77076	1.54465	1.77339	1.71012	1.69475	1.66867	1.74777	0.0487526	0.0785059	0.0490572	0.0995711	0.142415	0.0210386	0.0471553	0.111052	0.0862708	0.0963923	0.0728636	3.17945	5.83724	2.93009	5.77226	8.04258	1.36203	2.65905	6.49378	5.09048	5.77659	4.16894
PC(36:5)	0.118493	0.169748	0.0981457	0.100277	0.103508	0.0863544	0.0649943	0.0595724	0.0611694	0.0619046	0.0648753	0.027928	0.0165329	0.00836033	0.00441378	0.0087061	0.0188461	0.00955353	0.00608896	0.00990861	0.00252392	0.0159759	23.5693	9.73969	8.51828	4.40159	8.41101	21.8242	14.699	10.2211	16.1986	4.07711	24.6255
PC(36:4)	5.10635	6.25777	5.8962	5.87332	6.15814	4.95262	4.07335	4.05656	4.38207	4.38657	4.19586	0.206392	0.56701	0.191422	0.15718	0.261007	0.179502	0.178731	0.11417	0.119953	0.224512	0.296475	4.04187	9.06088	3.24654	2.67617	4.2384	3.6244	4.38781	2.81446	2.73736	5.11818	7.06589
PC(36:3)	0.212451	0.258278	0.244806	0.2469	0.278336	0.287097	0.19521	0.191489	0.193002	0.181925	0.191153	0.0315737	0.0168572	0.0298369	0.0156485	0.0249539	0.0386134	0.0185854	0.00829019	0.00478674	0.0154781	0.0118653	14.8617	6.52678	12.188	6.33799	8.96539	13.4496	9.5207	4.32934	2.48015	8.50797	6.20719
PC(36:2)	1.26529	1.50022	1.26746	1.15877	1.22474	1.61271	0.806389	0.847994	0.701122	0.741731	0.84199	0.0973852	0.0490691	0.055775	0.05571	0.102762	0.0263535	0.0752185	0.0775545	0.00853287	0.0203845	0.0628456	7.69669	3.27079	4.40052	4.8077	8.39054	1.63411	9.32782	9.14564	1.21703	2.74823	7.46394
PC(36:1)	2.46405	2.67504	2.9507	2.7437	3.03298	3.60626	2.72983	3.26063	2.42616	2.48962	2.63249	0.0766392	0.0139581	0.0748573	0.176937	0.220909	0.130458	0.0736084	0.367013	0.117493	0.0527794	0.160338	3.11029	0.521789	2.53693	6.44883	7.28358	3.61753	2.69644	11.2559	4.84275	2.11998	6.09072
PC(38:6)	2.2283	2.45858	2.6684	2.56265	2.47506	2.93524	2.69104	1.86433	1.80637	1.74319	1.72216	0.101061	0.103105	0.0956552	0.0985707	0.136403	0.0361294	0.126396	0.0692308	0.0337105	0.106615	0.103167	4.53535	4.19369	3.58475	3.84643	5.51111	1.23088	4.6969	3.71343	1.86621	6.11607	5.99054
PC(38:5)	2.22013	2.80349	1.61759	1.47336	1.62504	1.86116	1.10401	0.773802	0.700852	0.747519	0.81959	0.239455	0.246645	0.112913	0.118475	0.0928287	0.0350685	0.126066	0.0352522	0.0414467	0.0291625	0.0432213	10.7856	8.79779	6.98033	8.04114	5.71241	1.88423	11.4189	4.55571	5.91375	3.90123	5.27352
PC(38:4)	3.29182	4.01196	4.39605	4.19066	4.54484	4.10181	2.70011	2.82842	3.02286	3.12588	3.13939	0.150392	0.232161	0.232314	0.290955	0.119512	0.119941	0.207095	0.121966	0.125683	0.0511008	0.201318	4.56867	5.78672	5.28461	6.94294	2.62961	2.9241	7.66987	4.31216	4.15774	1.63476	6.41262
PC(40:7)	0.697536	1.02814	0.704521	0.71785	0.792956	0.88736	0.529102	0.355057	0.386704	0.381971	0.375087	0.0800269	0.157175	0.0791277	0.0583777	0.126124	0.05843	0.019686	0.0514945	0.0173973	0.0612662	0.0489814	11.4728	15.2873	11.2314	8.13231	15.9055	6.5847	3.72065	14.5032	4.49887	16.0395	13.0587
PC(40:6)	0.854491	1.05507	0.948325	0.934187	0.973851	1.33862	1.14856	0.690386	0.544456	0.543254	0.596845	0.0877886	0.0752052	0.0526513	0.0747765	0.15323	0.0583415	0.0605347	0.0309317	0.0114121	0.0508804	0.0691446	10.2738	7.12795	5.55203	8.00445	15.7344	4.35833	5.2705	4.48035	2.09606	9.36586	11.585
PC(40:5)	0.10457	0.145147	0.0810177	0.0882931	0.0992555	0.129329	0.0607465	0.0576105	0.046081	0.057213	0.0640423	0.0144628	0.0191886	0.00616749	0.0145799	0.0166837	0.00411884	0.00232235	0.00103489	0.00127453	0.00226594	0.00262309	13.8307	13.2201	7.61253	16.5131	16.8088	3.18477	3.82302	1.79636	2.76585	3.96054	4.09587
PC(40:4)	0.0639118	0.0925897	0.0901401	0.0884847	0.0940145	0.129678	0.0986939	0.0934949	0.0834296	0.0887067	0.0869705	0.00464083	0.0259579	0.00524289	0.00765711	0.00761206	0.00922174	0.0114417	0.0137431	0.00960652	0.00469368	0.00617674	7.2613	28.0354	5.81637	8.6536	8.09669	7.11125	11.5931	14.6993	11.5145	5.29123	7.10211
PC	45.8045	47.5616	46.5021	45.9257	47.4485	45.092	43.0168	40.9444	40.7176	40.7628	41.0751	0.625517	0.462095	0.827782	0.55052	1.30359	0.670356	1.86824	2.64584	0.471429	0.779905	0.250332	1.36562	0.971572	1.7801	1.19872	2.74738	1.48664	4.34304	6.46201	1.1578	1.91328	0.60945
PC-O(32:1)	0.0796482	0.075694	0.0501349	0.0561015	0.0580336	0.0590631	0.0866154	0.0623766	0.0692035	0.0684188	0.0748456	0.00921656	0.00710683	0.0038969	0.00904906	0.0115036	0.00832693	0.0112664	0.00701995	0.0027901	0.00269641	0.00837055	11.5716	9.3889	7.77283	16.1298	19.8223	14.0984	13.0074	11.2541	4.03173	3.94104	11.1838
PC-O(32:0)	0.125544	0.104879	0.0993976	0.0859473	0.0941398	0.0660542	0.109083	0.110126	0.0994938	0.102438	0.110413	0.00558761	0.0135966	0.0168765	0.00316881	0.0179307	0.00809718	0.0105223	0.0229057	0.00278525	0.00802184	0.0133899	4.45073	12.9642	16.9788	3.68692	19.0469	12.2584	9.64614	20.7995	2.79942	7.83095	12.1272
PC-O(34:1)	0.158907	0.160819	0.216444	0.219608	0.225323	0.216458	0.151785	0.225165	0.202574	0.209536	0.222124	0.00935755	0.00690347	0.00195756	0.0122003	0.0162743	0.00504705	0.00261852	0.0286985	0.00829771	0.0102468	0.00970302	5.88869	4.29271	0.904421	5.55549	7.22264	2.33165	1.72515	12.7455	4.09614	4.89024	4.36829
PC-O*	0.364099	0.341391	0.365976	0.361657	0.377496	0.341575	0.347484	0.397667	0.371271	0.380392	0.407382	0.0060203	0.0129468	0.0160569	0.00759119	0.0191085	0.012764	0.0223923	0.0472753	0.00778248	0.0157175	0.026792	1.65348	3.79236	4.38741	2.099	5.06189	3.7368	6.44412	11.8882	2.09617	4.13192	6.57663
LPE(16:0)	0	0.025225	0.0301184	0.0301845	0.025798	0.0302481	0.0232081	0.026641	0.0291867	0.0208978	0.0238965	0	0.00547089	0.00329757	0.0017613	0.00460363	0.00645488	0.00521983	0.00381696	0.00891988	0.00458614	0.00725825		21.6884	10.9487	5.83511	17.8449	21.3398	22.4914	14.3274	30.5615	21.9456	30.3736
LPE(18:1)	0.0588419	0.0742614	0.0600618	0.0574942	0.0677403	0.0733659	0.0524162	0.0624005	0.0379456	0.034689	0.0412188	0.019341	0.0117206	0.0104274	0.00800814	0.0182657	0.024667	0.00473798	0.0227055	0.00673305	0.00912375	0.00938773	32.8694	15.7829	17.3611	13.9286	26.9643	33.6219	9.03917	36.3867	17.744	26.3016	22.7754
LPE(18:0)	0.100669	0.0976419	0.111802	0.0972269	0.0952116	0.124033	0.0927812	0.0818453	0.103657	0.0814359	0.0923209	0.0215679	0.0193118	0.0171717	0.00827068	0.0165227	0.0175248	0.0155667	0.0190212	0.00616487	0.00809012	0.0224153	21.4246	19.7782	15.359	8.50658	17.3537	14.1292	16.7779	23.2404	5.9474	9.93435	24.2798
LPE(20:4)	0.12185	0.133214	0.122146	0.100034	0.102277	0.0815672	0.131391	0.0936551	0.126735	0.110618	0.113531	0.0232032	0.00727676	0.0338277	0.0067662	0.0250338	0.0160381	0.0317936	0.0210649	0.034278	0.0125149	0.0149451	19.0425	5.46245	27.6944	6.7639	24.4764	19.6625	24.1978	22.492	27.0469	11.3136	13.1638
LPE(22:6)	0.270102	0.276492	0.363311	0.311013	0.321102	0.266645	0.436985	0.26753	0.404191	0.398472	0.34613	0.0324393	0.00839148	0.0722637	0.00925595	0.0822175	0.0701945	0.109801	0.0225685	0.0590308	0.108533	0.0831836	12.01	3.03498	19.8903	2.97607	25.6048	26.3251	25.127	8.43586	14.6047	27.2373	24.0325
LPE	0.551463	0.606835	0.687439	0.595952	0.612129	0.575859	0.736781	0.532072	0.701715	0.646113	0.617098	0.0858958	0.0387609	0.124845	0.00797787	0.14268	0.129855	0.16354	0.061264	0.105928	0.13416	0.0852751	15.576	6.38739	18.1608	1.33868	23.3088	22.5498	22.1966	11.5142	15.0956	20.7642	13.8187
PE(34:1)	0.382028	0.358893	0.352409	0.377142	0.370812	0.451876	0.413566	0.512401	0.38318	0.389176	0.403772	0.0390381	0.0266759	0.0106754	0.00318511	0.0261504	0.0252513	0.0127614	0.0251325	0.0124178	0.0116753	0.0295144	10.2187	7.43284	3.02926	0.844538	7.05219	5.5881	3.08569	4.90486	3.24073	3.00001	7.30967
PE(34:0)	0.26437	0.26994	0.272318	0.26925	0.27245	0.231216	0.316118	0.311911	0.284638	0.306564	0.294659	0.0224218	0.010361	0.0290294	0.0185153	0.0256315	0.00779731	0.0144599	0.0295713	0.0139179	0.0320474	0.0235769	8.4812	3.83825	10.6601	6.87661	9.40778	3.3723	4.5742	9.4807	4.8897	10.4537	8.0014
PE(36:4)	0.545769	0.510376	0.397729	0.393257	0.427785	0.310612	0.465162	0.425948	0.355823	0.492204	0.439222	0.0402011	0.036818	0.107356	0.0754001	0.0420226	0.0848727	0.064598	0.103362	0.0447836	0.0662129	0.0896817	7.36595	7.2139	26.9924	19.1733	9.8233	27.3244	13.8872	24.2664	12.5859	13.4523	20.4183
PE(36:3)	0	0	0.0185251	0.0261432	0.0269624	0.0381935	0.0383773	0.0368659	0.0204076	0.0275648	0.0287341	0	0	0.00571119	0.00736468	0.00766318	0.00347547	0.00339543	0.00122393	0.00358173	0.00252614	0.00646984			30.8294	28.1705	28.4217	9.09965	8.84748	3.31994	17.551	9.16438	22.5162
PE(36:2)	0.192003	0.242732	0.217927	0.250867	0.293205	0.489579	0.331332	0.305832	0.188614	0.175681	0.214804	0.015239	0.0233747	0.0373358	0.0150327	0.0255311	0.0415206	0.0604188	0.0166886	0.0142949	0.0230237	0.0440392	7.93687	9.62985	17.1322	5.99231	8.70757	8.48087	18.2351	5.45678	7.57895	13.1054	20.5021
PE(36:1)	0.625793	0.593986	0.639492	0.650223	0.652034	0.882639	0.632978	0.943	0.677645	0.672508	0.706881	0.00275546	0.0197804	0.0251183	0.0271808	0.0365743	0.0571213	0.0274713	0.0832075	0.0150243	0.0224435	0.0566003	0.440316	3.33012	3.92786	4.18023	5.60926	6.47165	4.34001	8.8237	2.21713	3.33729	8.00705
PE(38:6)	1.73752	1.55993	1.71407	1.70089	1.53622	1.83455	2.30218	1.9298	2.40973	2.28382	2.21819	0.0907627	0.0763302	0.0703566	0.0661373	0.0270717	0.051507	0.100128	0.286018	0.0610868	0.0508093	0.0810765	5.22371	4.8932	4.10465	3.88838	1.76222	2.8076	4.34925	14.8211	2.535	2.22475	3.65508
PE(38:5)	0.849561	0.896746	0.644892	0.706688	0.764537	0.669222	0.867969	0.888092	0.574917	0.64174	0.686349	0.051952	0.0529666	0.0452847	0.0329254	0.0513157	0.0198156	0.0483535	0.0624309	0.0257948	0.0181642	0.0375888	6.11516	5.90653	7.02207	4.65911	6.712	2.96099	5.57088	7.02978	4.4867	2.83046	5.47663
PE(38:4)	4.91693	5.00331	4.60451	4.79612	5.12138	4.24044	4.11643	4.90403	5.12797	5.43089	5.41228	0.140549	0.0324614	0.321069	0.257611	0.460887	0.0806453	0.237169	0.10991	0.257423	0.170059	0.474602	2.85847	0.6488	6.97292	5.37125	8.99929	1.90181	5.76153	2.24122	5.01997	3.13132	8.76898
PE(38:1)	0	0.0445291	0.0532379	0.0605517	0.0563951	0.100264	0.049174	0.102347	0.0369589	0.0496345	0.0590611	0	0.00784066	0.00679954	0.00534374	0.0114953	0.00731327	0.00306499	0.0194353	0.00607543	0.000313116	0.00811269		17.6079	12.772	8.8251	20.3834	7.29403	6.23296	18.9897	16.4384	0.630844	13.7361
PE(40:7)	0.574906	0.582249	0.571293	0.552382	0.517147	0.736465	0.639004	0.496676	0.546368	0.515147	0.528198	0.0271674	0.00265198	0.013443	0.0325931	0.00843582	0.00600826	0.0488642	0.0529469	0.0358321	0.0530657	0.0440174	4.72554	0.455471	2.35308	5.90046	1.63122	0.815824	7.64693	10.6602	6.55824	10.3011	8.33351
PE(40:6)	4.50617	4.16177	5.83991	5.9579	5.59438	6.3213	8.1273	6.39586	6.79311	6.23902	5.98442	0.174552	0.0830732	0.300682	0.293082	0.115581	0.434806	0.993923	0.387967	0.231238	0.409583	0.122912	3.87363	1.9961	5.14875	4.91921	2.06603	6.87842	12.2294	6.06592	3.40401	6.56487	2.05387
PE(40:5)	0.117564	0.116484	0.113382	0.131297	0.125219	0.1409	0.104868	0.158932	0.158296	0.158008	0.15877	0.0150133	0.00451875	0.0107247	0.00307309	0.00711237	0.00708475	0.0217533	0.0114399	0.0146231	0.0208912	0.015348	12.7704	3.87929	9.45891	2.34057	5.67996	5.02823	20.7435	7.19798	9.23785	13.2216	9.66683
PE	14.7126	14.3409	15.4397	15.8727	15.7585	16.4473	18.4045	17.4117	17.5577	17.382	17.1353	0.226872	0.17333	0.323315	0.156268	0.676804	0.555219	1.04025	0.67732	0.224262	0.417369	0.360088	1.54202	1.20864	2.09405	0.984506	4.29484	3.37576	5.65214	3.89003	1.27729	2.40116	2.10144
PE-P(34:1)	0.303398	0.308346	0.342056	0.362508	0.348873	0.491123	0.313991	0.741687	0.396738	0.423681	0.485097	0.0445214	0.0252994	0.0228722	0.0231839	0.0250647	0.0137818	0.0175077	0.119197	0.0209098	0.0153914	0.0313576	14.6742	8.20486	6.68667	6.39542	7.18448	2.80618	5.57585	16.071	5.27044	3.63279	6.46419
PE-P(34:0)	0.0757644	0.0985698	0.121142	0.1343	0.134488	0.109432	0.113637	0.171734	0.121699	0.121783	0.126051	0.0203695	0.00734281	0.013483	0.0131036	0.0231965	0.010011	0.00147051	0.00843659	0.00716249	0.00889061	0.0102659	26.8853	7.44935	11.1299	9.75694	17.248	9.14819	1.29405	4.91258	5.88543	7.30039	8.14423
PE-P(36:4)	0.83753	0.747039	0.207846	0.19463	0.201761	0.322197	0.648571	0.367304	0.292906	0.315698	0.347482	0.067072	0.0412344	0.0155343	0.0251847	0.00716882	0.0922421	0.0227281	0.0474041	0.0165571	0.021272	0.0346264	8.0083	5.51971	7.47397	12.9398	3.55313	28.6291	3.50434	12.906	5.65269	6.7381	9.96496
PE-P(36:3)	0.0378656	0.0877349	0.0396327	0.0538011	0.0537824	0.06686	0.0409673	0.114902	0.0665597	0.0778957	0.0824818	0.000128277	0.0166968	0.00961286	0.00471104	0.0123265	0.00234203	0.00409073	0.0230576	0.00679214	0.00597694	0.00676581	0.33877	19.0309	24.2548	8.7564	22.9192	3.50288	9.98535	20.0672	10.2046	7.67301	8.20279
PE-P(36:2)	0.123661	0.205167	0.135788	0.140181	0.159863	0.652292	0.153864	0.715518	0.062895	0.138278	0.2526	0.00965027	0.0167121	0.0139151	0.0065501	0.0259784	0.0835133	0.0439952	0.165127	0.0150327	0.0373094	0.0877624	7.80381	8.1456	10.2477	4.6726	16.2504	12.803	28.5935	23.0779	23.9013	26.9814	34.7436
PE-P(36:1)	0.122944	0.179567	0.110333	0.114975	0.130368	0.449516	0.121695	0.540453	0.0705257	0.109093	0.177948	0.0235863	0.0244097	0.00699221	0.0108911	0.0174373	0.0590882	0.0213352	0.120507	0.00985769	0.0279068	0.0613617	19.1845	13.5936	6.33735	9.47256	13.3755	13.1449	17.5316	22.2974	13.9774	25.5807	34.483
PE-P(38:6)	3.14061	2.9615	2.04674	2.19418	2.07271	2.37089	3.5925	2.50968	3.50787	3.46891	3.58379	0.133307	0.0806117	0.134773	0.10952	0.0994721	0.204019	0.0940038	0.24359	0.110804	0.139814	0.197657	4.24462	2.72199	6.58478	4.99137	4.79913	8.60516	2.61667	9.70604	3.15872	4.03048	5.51531
PE-P(38:5)	0.842454	0.808411	0.503546	0.535585	0.548763	0.651751	0.706972	0.952357	0.641758	0.679242	0.769505	0.0216451	0.0487107	0.048473	0.0308857	0.0428432	0.0190279	0.0218362	0.161643	0.00541915	0.0267824	0.0765671	2.56929	6.02549	9.62634	5.76673	7.80724	2.9195	3.0887	16.9729	0.844423	3.94298	9.95017
PE-P(38:4)	1.71662	1.68411	1.02527	1.10073	1.14479	1.22336	1.57231	1.74688	1.27486	1.36258	1.48392	0.0850747	0.0683141	0.0613753	0.0777853	0.0759685	0.0459394	0.0642788	0.166752	0.0499508	0.0341837	0.0863975	4.95594	4.0564	5.98627	7.06668	6.63603	3.75518	4.08817	9.54574	3.91814	2.50875	5.82224
PE-P(40:7)	0.861277	0.826997	1.16091	1.19016	1.06513	1.05673	1.06611	1.14936	1.39163	1.33466	1.2794	0.0488783	0.0273757	0.0554198	0.055681	0.0622637	0.00755547	0.107241	0.135927	0.0248532	0.067185	0.0228667	5.6751	3.31025	4.77382	4.67846	5.84565	0.714985	10.0591	11.8264	1.78591	5.03386	1.7873
PE-P(40:6)	2.99798	2.9053	4.34933	4.47557	4.0205	3.44337	4.2249	4.30222	4.96336	4.62593	4.2573	0.0258946	0.0894907	0.199761	0.252484	0.275684	0.113146	0.330656	0.335418	0.22823	0.26868	0.151197	0.863735	3.08026	4.59291	5.64137	6.85697	3.28591	7.82636	7.7964	4.5983	5.80812	3.55147
PE-P(40:5)	0.306032	0.30572	0.355407	0.387062	0.375219	0.552389	0.31391	0.597116	0.481979	0.477449	0.518657	0.0260199	0.0156297	0.0164826	0.0161222	0.0217817	0.0390814	0.00997187	0.0565659	0.00349456	0.0313927	0.0333102	8.50237	5.11242	4.63768	4.16528	5.80505	7.07498	3.17667	9.47318	0.725044	6.57508	6.4224
PE-P(40:4)	0.395783	0.424253	0.474374	0.536259	0.537637	0.554592	0.414675	0.65707	0.59912	0.609347	0.634451	0.0401663	0.0152975	0.00649459	0.00970928	0.0256471	0.0302874	0.0294231	0.0705052	0.021729	0.00893417	0.0426826	10.1486	3.60575	1.36909	1.81056	4.77034	5.4612	7.09546	10.7302	3.62683	1.46619	6.7275
PE-P*	11.7619	11.5427	10.8724	11.4199	10.7939	11.9445	13.2841	14.5663	13.8719	13.7445	13.9987	0.130464	0.27891	0.367256	0.227746	0.54584	0.110383	0.585486	1.25412	0.334926	0.563485	0.344235	1.10921	2.41633	3.37789	1.99429	5.05694	0.924129	4.40742	8.60976	2.41442	4.0997	2.45906
LPI(16:0)	0	0.019732	0.0170509	0.0187235	0.0143796	0.0176987	0.010315	0.0098054	0.00662536	0.00574519	0.00486179	0	0.00299181	0.0053192	0.00143286	0.00290144	0.00271677	0.00455329	0.00177115	0.00152546	0.00111078	0.000688131		15.1622	31.196	7.65274	20.1775	15.3501	44.1422	18.063	23.0245	19.3341	14.1539
LPI(18:1)	0.0451495	0.0695584	0.0354467	0.0378693	0.0467175	0.0388314	0.0126008	0.0112634	0.0163854	0.012829	0.0133755	0.00664688	0.0201713	0.00403713	0.00620427	0.00272769	0.00722758	0.00172392	0.00210483	0.00250459	0.00488709	0.00495339	14.7219	28.9991	11.3893	16.3834	5.83868	18.6127	13.681	18.6873	15.2855	38.0939	37.0333
LPI(18:0)	0.121204	0.154386	0.0919464	0.0783073	0.0850557	0.105993	0.0374183	0.0423719	0.0512813	0.0436076	0.0521765	0.00945232	0.0194136	0.0057672	0.0140344	0.00537967	0.015523	0.00475321	0.00940696	0.00427045	0.00998481	0.0111176	7.79869	12.5748	6.27235	17.9222	6.32487	14.6454	12.7029	22.2009	8.3275	22.897	21.3076
LPI(20:4)	0.0753934	0.0554331	0.083946	0.0799797	0.0739609	0.0582312	0.0702516	0.0511505	0.101219	0.0900192	0.0965457	0.00837082	0.005674	0.0112802	0.00488318	0.0160498	0.00859038	0.00873855	0.0129895	0.00730535	0.0214723	0.0148135	11.1029	10.2358	13.4374	6.10552	21.7004	14.7522	12.4389	25.3946	7.21738	23.853	15.3435
LPI(20:3)	0.0210406	0.0264356	0.016488	0.0181318	0.0286501	0.0167321	0.0069019	0	0.0099551	0.00949837	0.0074314	0.00321694	0.00412178	0.00743638	0.00559865	0.00993833	0.00399864	0.000150487	0	0.0020897	0.00234822	0.00197393	15.2892	15.5918	45.1017	30.8776	34.6887	23.8981	2.18036		20.9913	24.7224	26.562
LPI	0.262787	0.325545	0.244878	0.233012	0.248764	0.237486	0.137488	0.114591	0.185466	0.161699	0.174391	0.0113625	0.0415655	0.0239177	0.02519	0.0275575	0.034304	0.0186426	0.0223189	0.0101768	0.0333434	0.0183989	4.32383	12.768	9.76718	10.8106	11.0778	14.4446	13.5595	19.477	5.48714	20.6206	10.5504
PI(36:5)	0.00730489	0.0370317	0.0603321	0.0851087	0.0917418	0.065695	0.0497317	0.032697	0.0421008	0.0320617	0.0274992	0.0126524	0.0145205	0.00344997	0.0108028	0.0271283	0.0159608	0.021005	0.0123325	0.011725	0.00707806	0.00392227	173.205	39.2109	5.7183	12.693	29.5703	24.2953	42.2366	37.7176	27.8499	22.0764	14.2632
PI(36:4)	0.463662	0.49817	0.816731	0.748621	0.757678	0.50774	0.388217	0.531304	0.416243	0.42382	0.417563	0.0331171	0.0278521	0.0488313	0.0699622	0.0568361	0.00298912	0.100732	0.134381	0.0134538	0.0219775	0.0252009	7.14253	5.59089	5.97887	9.34548	7.50135	0.588712	25.9475	25.2927	3.2322	5.18557	6.03523
PI(38:6)	0.04443	0.0656761	0.0813115	0.0816272	0.0778047	0.133888	0.108315	0.0772991	0.0367457	0.0363557	0.037503	0.0115288	0.00733369	0.0108931	0.00997537	0.0157496	0.0112384	0.0391731	0.00944956	0.00502242	0.00432344	0.00989137	25.9483	11.1665	13.3967	12.2206	20.2425	8.39386	36.166	12.2247	13.668	11.8921	26.3749
PI(38:5)	0.958835	1.21295	1.03892	0.916188	0.983326	1.10791	0.303014	0.4317	0.394919	0.389272	0.418368	0.101412	0.127304	0.0427058	0.110703	0.0806615	0.0203433	0.0687729	0.066669	0.0135338	0.013315	0.0435491	10.5766	10.4954	4.11061	12.083	8.20293	1.8362	22.6962	15.4433	3.42699	3.42048	10.4093
PI(38:4)	4.06122	4.57413	4.09787	3.84534	4.05011	4.13485	2.32955	2.68727	3.16422	3.19496	3.18099	0.240028	0.220578	0.160024	0.425456	0.124052	0.101753	0.640118	0.369978	0.044709	0.00817862	0.0780329	5.91023	4.8223	3.90505	11.0642	3.06293	2.46085	27.4783	13.7678	1.41296	0.255985	2.4531
PI(40:6)	0.0544165	0.0687232	0.0563221	0.0519928	0.061333	0.138931	0.103158	0.0896583	0.0205004	0.0230676	0.0248464	0.0133891	0.00829969	0.00780186	0.00479794	0.00930931	0.023214	0.0249693	0.0134072	0.00327603	0.00513541	0.00454756	24.6048	12.077	13.8522	9.22809	15.1783	16.709	24.205	14.9536	15.9803	22.2624	18.3027
PI(40:5)	0.072729	0.0390727	0.041021	0.00224958	0.00196403	0.000388784	0	0.0326483	0.0147264	0.0217679	0.0246635	0.021464	0.0075828	0.00692278	0.00389639	0.00250423	0.00022107	0	0.00499318	0.00429341	0.0101002	0.00777546	29.5122	19.4069	16.8762	173.205	127.505	56.862		15.2938	29.1546	46.3995	31.5262
PI(40:4)	1.40304	0.836034	0.769543	0.0783868	0.102935	0.332914	0.366227	0.700268	0.251785	0.419631	0.416831	0.392539	0.041062	0.209968	0.0390957	0.0361338	0.0239066	0.179117	0.103873	0.133019	0.0214378	0.190504	27.9778	4.91152	27.2848	49.8754	35.1036	7.18102	48.9087	14.8333	52.8304	5.10873	45.703
PI(40:3)	0.697205	0.520087	0.52757	0.10206	0.131015	0.178067	0.216194	0.235927	0.196406	0.196441	0.228222	0.0589385	0.0425436	0.177383	0.0311829	0.0196224	0.0399164	0.123463	0.081075	0.0849626	0.0596899	0.079363	8.45354	8.18009	33.6227	30.5536	14.9773	22.4165	57.1076	34.3644	43.2587	30.3857	34.7746
PI	7.76284	7.85188	7.48962	5.91157	6.25791	6.60038	3.8644	4.81877	4.53765	4.73737	4.77648	0.607023	0.372717	0.463149	0.675867	0.260557	0.174737	0.818673	0.722378	0.220065	0.0414395	0.274114	7.81959	4.74685	6.18388	11.433	4.16365	2.64738	21.185	14.9909	4.84976	0.874735	5.73883
LPS(18:0)	0	0	0.0128911	0.01427	0.0118701	0.0143634	0.00786601	0.00202393	0.0058108	0.00485542	0.000305926	0	0	0.00395404	0.00372677	0.00108185	0.00169389	0.00175737	0.00350555	0.00189594	0.00106674	0.000376121			30.6726	26.1161	9.11407	11.7931	22.3413	173.205	32.6279	21.9701	122.945
LPS(22:6)	0.0783772	0.0648885	0.0730207	0.0730262	0.0673667	0.0667069	0.101692	0.0397545	0.0692986	0.0565915	0.0667163	0.0167285	0.00676748	0.00690835	0.00284809	0.00368769	0.0104913	0.0158466	0.000945064	0.00440721	0.00861643	0.00795753	21.3435	10.4294	9.46081	3.90009	5.47406	15.7275	15.583	2.37725	6.35974	15.2257	11.9274
LPS	0.0783772	0.0648885	0.0859118	0.0872962	0.0792368	0.0810703	0.109558	0.0417784	0.0751094	0.0614469	0.0670222	0.0167285	0.00676748	0.00722527	0.0059492	0.00415172	0.0102736	0.0140948	0.00428799	0.00603409	0.00851871	0.00786273	21.3435	10.4294	8.4101	6.81495	5.23964	12.6724	12.8651	10.2636	8.03373	13.8635	11.7315
PS(34:1)	0.323461	0.326159	0.32477	0.373728	0.359513	0.239755	0.348275	0.315917	0.281192	0.298497	0.279093	0.0386883	0.0446935	0.0293781	0.046575	0.0105967	0.0154502	0.0347491	0.0791495	0.0217613	0.0257669	0.0242858	11.9607	13.703	9.04584	12.4623	2.94751	6.44417	9.9775	25.0539	7.73894	8.63223	8.7017
PS(36:4)	0.0444539	0.054376	0.0493977	0.069597	0.063336	0.0230613	0.0639401	0.064956	0.0590937	0.0690301	0.0542295	0.011981	0.00710291	0.0105972	0.0121949	0.00630021	0.00328032	0.00235299	0.0117452	0.00313465	0.00824549	0.008883	26.9514	13.0626	21.4528	17.5222	9.94728	14.2244	3.68	18.0817	5.30454	11.9448	16.3804
PS(36:2)	0.443507	0.378193	0.320407	0.340599	0.404975	0.484416	0.435162	0.41313	0.256508	0.295176	0.378146	0.0500387	0.0181107	0.0121278	0.0364901	0.0205667	0.0239275	0.0599778	0.111053	0.00793473	0.00912559	0.0214947	11.2825	4.78875	3.78512	10.7135	5.0785	4.93946	13.7829	26.8807	3.09336	3.09158	5.68424
PS(36:1)	0.746689	0.81223	0.532235	0.493964	0.546733	1.50148	0.476263	1.30063	0.275386	0.371046	0.628342	0.00847105	0.11056	0.0418022	0.0187242	0.0540768	0.202253	0.0622877	0.33788	0.0321257	0.0671414	0.150054	1.13448	13.612	7.85408	3.7906	9.89091	13.4703	13.0784	25.9781	11.6657	18.0952	23.881
PS(38:6)	0.139979	0.116945	0.141897	0.13927	0.105793	0.10216	0.217956	0.12403	0.143868	0.125778	0.106246	0.0183051	0.0103136	0.012157	0.00799457	0.00456737	0.00346407	0.0251449	0.0322817	0.00809025	0.0043537	0.00944901	13.0771	8.81914	8.56748	5.74035	4.31729	3.39083	11.5367	26.0272	5.62338	3.46142	8.89349
PS(38:5)	0.0844047	0.0858679	0.0635102	0.0795904	0.0839342	0.0571666	0.108726	0.100128	0.0664501	0.0816005	0.0839731	0.00966047	0.010208	0.0089116	0.00916534	0.00545313	0.00349367	0.00626976	0.0267947	0.00436074	0.00211609	0.0103652	11.4454	11.888	14.0318	11.5156	6.49691	6.11138	5.76659	26.7604	6.56243	2.59324	12.3435
PS(38:4)	0.611232	0.620634	0.414378	0.432962	0.489445	0.620386	0.427842	0.578122	0.401617	0.483242	0.554303	0.0223114	0.0531459	0.0330072	0.0582361	0.00570457	0.0129852	0.0212394	0.138407	0.0483676	0.0131815	0.0249177	3.65024	8.56316	7.96548	13.4506	1.16552	2.09308	4.9643	23.9408	12.0432	2.72772	4.49533
PS(38:3)	0.0291131	0.0539765	0.0297404	0.0369274	0.0404855	0.0895888	0.0353405	0.0892089	0.0300667	0.0401289	0.0510915	0.00726024	0.0125207	0.00669235	0.00822609	0.00624591	0.0111334	0.00245171	0.0212017	0.00850445	0.00451023	0.00645821	24.938	23.1965	22.5026	22.2764	15.4275	12.4273	6.9374	23.7663	28.2853	11.2394	12.6405
PS(40:7)	0.312187	0.23955	0.241577	0.236474	0.206795	0.261359	0.425877	0.251465	0.260544	0.248311	0.24665	0.0173766	0.017464	0.00729667	0.0195543	0.00667956	0.0153327	0.0600142	0.0625521	0.00439558	0.0118527	0.0207278	5.56609	7.29033	3.02043	8.2691	3.23004	5.86655	14.0919	24.875	1.68708	4.77334	8.40373
PS(40:6)	9.95527	7.8461	9.6398	10.0584	8.91382	7.88953	11.4379	9.97255	13.3499	13.1864	12.3386	0.712318	0.294693	0.430408	0.432294	0.160233	0.369727	1.19696	2.59771	0.274564	0.401282	0.459172	7.15519	3.75592	4.46491	4.29786	1.79758	4.6863	10.4649	26.0486	2.05666	3.04315	3.72144
PS(40:4)	0.492021	0.493712	0.436471	0.457536	0.467159	0.648519	0.362375	0.550152	0.511867	0.544907	0.591246	0.0209323	0.0351969	0.0164792	0.0401591	0.0184552	0.0351296	0.0373666	0.144679	0.0321183	0.0208666	0.03955	4.25435	7.12903	3.77557	8.77724	3.95051	5.4169	10.3116	26.2979	6.27474	3.82938	6.68926
PS	13.1823	11.0277	12.1942	12.719	11.682	11.9174	14.3396	13.7603	15.6365	15.7441	15.3119	0.833335	0.50167	0.484861	0.561991	0.0918066	0.159576	1.47599	3.41662	0.238873	0.43392	0.343251	6.32161	4.54916	3.97616	4.41852	0.785881	1.33901	10.2931	24.8295	1.52766	2.75608	2.24173
LPG(22:6)	0.0112865	0.00980811	0.00982167	0.00602425	0.00595486	0.00666615	0.00238012	0.00634986	0.00179972	0.00298349	0.0034711	0.0037775	0.00163844	0.00430744	0.000974083	0.000471858	0.00138855	0.000483484	0.000975513	0.00073564	0.000885893	0.000957844	33.4691	16.7049	43.8565	16.1694	7.92391	20.8298	20.3135	15.3627	40.8752	29.6932	27.5948
LPG*	0.0112865	0.00980811	0.00982167	0.00602425	0.00595486	0.00666615	0.00238012	0.00634986	0.00179972	0.00298349	0.0034711	0.0037775	0.00163844	0.00430744	0.000974083	0.000471858	0.00138855	0.000483484	0.000975513	0.00073564	0.000885893	0.000957844	33.4691	16.7049	43.8565	16.1694	7.92391	20.8298	20.3135	15.3627	40.8752	29.6932	27.5948
PG(32:0)	0.00795804	0.0138382	0.0160404	0.0152497	0.016474	0.0157012	0.0295259	0.0168873	0.00955552	0.0100244	0.00838214	0.00243648	0.00241804	0.00242046	0.000342781	0.000128327	0.00130213	0.00417169	0.00146919	0.000928454	0.00082586	0.00220045	30.6166	17.4736	15.0898	2.24778	0.778966	8.29316	14.1289	8.69999	9.71642	8.23847	26.2517
PG(34:1)	0.0414646	0.0519012	0.0517232	0.0561781	0.0611001	0.072043	0.0517349	0.0493225	0.0296863	0.0304092	0.0244874	0.00707844	0.00851481	0.00696273	0.00593933	0.00369824	0.00803404	0.0109961	0.00943789	0.00712117	0.00945729	0.00576825	17.071	16.4058	13.4615	10.5723	6.05275	11.1517	21.2546	19.1351	23.988	31.1001	23.556
PG(36:4)	0.0182201	0.0214905	0.0476206	0.0414902	0.0363321	0.0202207	0.0140681	0.0291643	0.0192998	0.0197548	0.0173196	0.00265978	0.0022902	0.00310484	0.00401465	0.00322575	0.000826529	0.0011626	0.00197563	0.00060535	0.000834964	0.00366054	14.5981	10.6568	6.51995	9.67615	8.8785	4.08753	8.26403	6.77412	3.13657	4.22663	21.1353
PG(38:6)	0	0	0.0087861	0.00762169	0.00637086	0.00624555	0.00500234	0	0.00318003	0.00157737	0.0011322	0	0	0.00234045	0.00153202	0.000990476	0.00113388	0.00192918	0	0.00236488	0.00209368	0.0022644			26.6381	20.1008	15.547	18.155	38.5655		74.3667	132.733	200
PG(38:5)	0	0.00458704	0.0120655	0.0125317	0.0090429	0.00580515	0.00420038	0.00801053	0.00539676	0.00517587	0.00313209	0	0.00460107	0.00251697	0.00177794	0.00221323	0.00118602	0.00113149	0.00183769	0.00121454	0.00151038	0.00239119		100.306	20.8609	14.1875	24.4747	20.4304	26.9378	22.9409	22.505	29.1812	76.3447
PG(38:4)	0.0218896	0.0273417	0.0455634	0.0387185	0.0322206	0.0202383	0.0150354	0.0262208	0.0179606	0.015972	0.0146766	0.00219802	0.00377393	0.00443503	0.00427282	0.00623718	0.00155178	0.00396949	0.00351481	0.000195198	0.00361115	0.00249823	10.0414	13.8028	9.73375	11.0356	19.3577	7.66755	26.4009	13.4047	1.08681	22.6092	17.0218
PG(40:7)	0	0.00971609	0.0079592	0.00920159	0.0104016	0.0129886	0.00214603	0.00105657	0.00170804	0.000668789	0.000633431	0	0.00430091	0.00269779	0.000434603	0.00181101	0.000814914	0.00207328	0.00183003	0.00114634	0.00133758	0.00126686		44.2659	33.8953	4.72313	17.4109	6.27407	96.6098	173.205	67.1144	200	200
PG(40:6)	0	0.00179061	0.00830472	0.0118679	0.0114345	0.00554092	0.0130424	0.00433923	0.00825364	0.0070688	0.00530436	0	0.00310143	0.00788168	0.00721548	0.0020952	0.00215477	0.00402906	0.00385269	0.000481191	0.000677145	0.00259122		173.205	94.9061	60.7982	18.3235	38.8882	30.8921	88.7873	5.83005	9.57934	48.8508
PG(42:10)	0.0351403	0.0607453	0.066644	0.0575595	0.058799	0.0496802	0.00230563	0.00124634	0.00596602	0.00275241	0.00161386	0.00203495	0.0129222	0.00867481	0.00678937	0.0126633	0.00168566	0.000499627	0.00215872	0.00108185	0.00189908	0.00204295	5.79093	21.2727	13.0167	11.7954	21.5366	3.39301	21.6699	173.205	18.1336	68.9971	126.588
PG(44:12)	0.132529	0.276391	0.194891	0.187918	0.19129	0.207966	0.0223605	0.0177272	0.0181022	0.0163397	0.0181197	0.0305534	0.011218	0.0209221	0.0260229	0.0198463	0.0159293	0.00297886	0.00675086	0.00176147	0.00420964	0.00503448	23.0541	4.05876	10.7353	13.848	10.375	7.65957	13.3219	38.082	9.73072	25.7633	27.7846
PG*	0.257202	0.467801	0.459598	0.438337	0.433466	0.41643	0.159422	0.153975	0.119109	0.109743	0.0948013	0.0330548	0.0218683	0.0493678	0.0291666	0.0492964	0.0309335	0.0165993	0.0218514	0.0111961	0.0194678	0.0187302	12.8517	4.67469	10.7415	6.65392	11.3726	7.42827	10.4122	14.1915	9.39992	17.7394	19.7573
PA(34:1)	0.0713738	0.0400163	0.0468681	0.038115	0.0412105	0.146271	0.0156598	0.223701	0.0356483	0.0551147	0.117999	0.0335816	0.0116413	0.02353	0.00811813	0.0122156	0.0106543	0.00563362	0.062365	0.00735936	0.0135241	0.0622941	47.0503	29.0913	50.2048	21.299	29.642	7.28397	35.9751	27.8788	20.6444	24.538	52.7918
PA(36:4)	0	0.00884453	0.00525986	0.00929961	0.00785909	0.042346	0.000542481	0.0523237	0.0108709	0.0123952	0.0247646	0	0.00781697	0.00691542	0.00815943	0.00704188	0.00522626	0.000767185	0.0143661	0.00244947	0.00648432	0.0217285		88.382	131.475	87.7394	89.6017	12.3418	141.421	27.4562	22.5323	52.3131	87.7401
PA(36:2)	0	0.00843827	0.00790016	0.00612404	0.0170479	0.0508246	0.00353491	0.0518837	0.00636478	0.0113614	0.0287153	0	0.00738014	0.0054619	0.00533105	0.00896099	0.00580732	0.000509192	0.0107203	0.00474644	0.00535065	0.0156976		87.4604	69.1366	87.0512	52.5637	11.4262	14.4047	20.6621	74.5736	47.0951	54.6661
PA(36:1)	0.0156293	0.0255905	0.0152881	0.0209612	0.0231697	0.14808	0	0.15648	0.00755826	0.0205234	0.0712564	0.0270708	0.00674442	0.0115523	0.00383031	0.0116975	0.017583	0	0.0152301	0.00307506	0.0132966	0.061206	173.205	26.3552	75.5637	18.2733	50.4862	11.874		9.73296	40.6847	64.7877	85.8954
PA(38:6)	0	0	0.000879613	0	0	0.0123968	0	0	0.00139927	0.0021048	0.00136764	0	0	0.00175923	0	0	0.0023956	0	0	0.00279854	0.00420959	0.00273528			200			19.3244			200	200	200
PA(38:5)	0	0	0.000773419	0.00192633	0.00138633	0.017477	0	0	0.000756655	0.00146664	0.00466376	0	0	0.00154684	0.00170244	0.00240119	0.00107776	0	0	0.00151331	0.00293328	0.00433954			200	88.3776	173.205	6.16672			200	200	93.048
PA(38:4)	0.0594528	0.0364772	0.0327906	0.0327827	0.0283739	0.103798	0.0174925	0.104433	0.0405574	0.0497911	0.092483	0.0273929	0.00838359	0.0118633	0.00448931	0.00796628	0.0122904	0.0169813	0.00868683	0.00697362	0.0120362	0.0420388	46.075	22.9831	36.1789	13.6941	28.076	11.8408	97.0776	8.31805	17.1945	24.1735	45.4557
PA	0.146456	0.119367	0.10976	0.109209	0.119047	0.521193	0.0248198	0.588821	0.103156	0.152757	0.34125	0.075553	0.039187	0.0474144	0.0119605	0.0341671	0.0492416	0.0268998	0.103225	0.0198312	0.0477831	0.189323	51.5875	32.8291	43.1983	10.9519	28.7004	9.44786	108.381	17.5308	19.2245	31.2804	55.4793
CL(70:5)	0	0.0147472	0.00524437	0.0141953	0.0133352	0.0187006	0.00945622	0	0.00649463	0.00437897	0.00266406	0	0.00461995	0.00685027	0.000985617	0.0021127	0.00312921	0.00489243	0	0.00121264	0.00538374	0.00532812		31.3276	130.621	6.94327	15.8431	16.7332	51.7377		18.6714	122.945	200
CL(70:4)	0	0.0341374	0.0195941	0.0318432	0.0302298	0.0413894	0.0254595	0.0141792	0.019	0.0170457	0.0171158	0	0.00623659	0.00746819	0.00145697	0.00402685	0.00182259	0.00338702	0.00427098	0.00100543	0.00604974	0.00474436		18.2691	38.1144	4.57543	13.3208	4.40352	13.3035	30.1214	5.29172	35.4913	27.7192
CL(72:9)	0	0	0.00173215	0.00568551	0.0048269	0.00890875	0.00190946	0	0.00112785	0.00150898	0.00135612	0	0	0.0034643	0.000755409	0.00121743	0.00119865	0.00330727	0	0.00130617	0.00301797	0.00271223			200	13.2866	25.2218	13.4547	173.205		115.811	200	200
CL(72:8)	0	0.0242774	0.0145728	0.0247074	0.0250792	0.0326339	0.0195167	0.0167625	0.0152238	0.015412	0.0134122	0	0.00500421	0.0123036	0.000838089	0.004137	0.00123427	0.00547514	0.0112967	0.0022892	0.00438089	0.00327611		20.6126	84.428	3.39205	16.4958	3.78216	28.0537	67.3926	15.037	28.4251	24.4263
CL(72:7)	0.0534459	0.0770015	0.0556601	0.0689753	0.0672333	0.0705013	0.0622963	0.0586628	0.0499242	0.0543066	0.0536923	0.0184186	0.0171683	0.0113989	0.00276786	0.00799601	0.00320324	0.00428383	0.0145825	0.00336438	0.00741638	0.00535657	34.4621	22.2961	20.4795	4.01284	11.8929	4.54352	6.87654	24.8582	6.73899	13.6565	9.97644
CL(72:6)	0	0.0379853	0.0212987	0.0330726	0.031981	0.0354349	0.026642	0.0223626	0.0200564	0.020783	0.0170851	0	0.00520391	0.010154	0.000702461	0.0058401	0.00205096	0.00706912	0.0106501	0.00250249	0.00374394	0.00538172		13.6998	47.6745	2.124	18.2611	5.78796	26.5338	47.6247	12.4773	18.0145	31.4995
CL(72:5)	0.00515626	0.0331304	0.0269671	0.036095	0.0375803	0.0564042	0.0318963	0.0298251	0.022675	0.0242058	0.0189333	0.00651769	0.00986683	0.0106455	0.000451152	0.00587201	0.00416821	0.00768032	0.0107037	0.00233887	0.00596209	0.00631502	126.403	29.7819	39.476	1.2499	15.6252	7.38988	24.079	35.8883	10.3147	24.6308	33.354
CL(72:4)	0.0150171	0.0465908	0.0383213	0.0491942	0.0484426	0.0657186	0.0454359	0.0490974	0.0308342	0.0309471	0.0325606	0.0142402	0.00802773	0.00672243	0.00368292	0.00385081	0.00353179	0.00468534	0.0143414	0.00191487	0.00494311	0.0056642	94.8262	17.2303	17.5423	7.4865	7.94922	5.3741	10.312	29.2101	6.21022	15.9728	17.3959
CL(74:10)	0.0238685	0.0533909	0.0472804	0.0508073	0.0479219	0.0462947	0.0436854	0.0419148	0.0400148	0.0417074	0.0370527	0.00690995	0.0106082	0.00270212	0.00212634	0.00497119	0.0030743	0.00597219	0.0132762	0.00425075	0.00685571	0.00992814	28.95	19.8689	5.7151	4.18511	10.3735	6.64071	13.6709	31.6742	10.6229	16.4376	26.7947
CL(74:9)	0.0264642	0.0540188	0.040343	0.0544971	0.0543218	0.0707751	0.0424723	0.0406954	0.0325178	0.0366147	0.0320098	0.0134202	0.00939601	0.0145506	0.00425131	0.01074	0.00550724	0.00407933	0.0105374	0.003247	0.00431936	0.0063396	50.7108	17.394	36.0673	7.80098	19.771	7.78133	9.60468	25.8934	9.98532	11.7968	19.8052
CL(74:8)	0.0377294	0.0774159	0.0663262	0.081064	0.0777278	0.0975781	0.0635865	0.0658639	0.0511607	0.0567892	0.0498251	0.0194219	0.0023661	0.00790675	0.00823903	0.015831	0.00849966	0.00908875	0.0176065	0.00514963	0.00808438	0.00485456	51.4769	3.05635	11.921	10.1636	20.3672	8.71062	14.2935	26.7316	10.0656	14.2358	9.74321
CL(74:7)	0.0753667	0.112858	0.09418	0.113303	0.113149	0.11658	0.0981006	0.100924	0.0796854	0.0863334	0.0803333	0.0155231	0.0191894	0.0134208	0.00793824	0.0091244	0.00793504	0.0109646	0.0263723	0.00590142	0.01297	0.0116991	20.5968	17.0031	14.2501	7.00623	8.06408	6.80652	11.1769	26.1309	7.40589	15.0232	14.5632
CL(76:12)	0.0130205	0.0367393	0.033852	0.0385514	0.0384256	0.0414958	0.0370129	0.0281807	0.0254324	0.0271028	0.0236768	0.0112904	0.00938538	0.00284246	0.000937964	0.00704226	0.00057273	0.00608583	0.0114754	0.00245879	0.00628103	0.00383851	86.7124	25.5459	8.39672	2.43302	18.327	1.38021	16.4425	40.7208	9.66794	23.1748	16.2121
CL(76:11)	0.0310227	0.0596714	0.0545929	0.0627065	0.0625023	0.0627901	0.0469671	0.0505908	0.0415927	0.0454085	0.0467665	0.0112314	0.00923351	0.00954985	0.00392867	0.0101297	0.00563235	0.0069876	0.0158271	0.00338975	0.00787574	0.00692791	36.2039	15.4739	17.4928	6.26517	16.2069	8.97012	14.8777	31.2845	8.14987	17.3442	14.8138
CL(76:10)	0.0846958	0.118846	0.114314	0.13151	0.126956	0.122758	0.0950201	0.110826	0.0964222	0.0908878	0.0891231	0.01144	0.0210658	0.00703976	0.0118831	0.0103316	0.00952591	0.0163478	0.0268977	0.0221541	0.0152511	0.00963762	13.5072	17.7254	6.15824	9.03588	8.13798	7.75989	17.2045	24.2703	22.9761	16.7801	10.8138
CL(76:9)	0.0425659	0.0752144	0.0680477	0.0881748	0.0796768	0.0981695	0.0796424	0.0652872	0.0448855	0.0476125	0.0448154	0.0179934	0.0174574	0.0191372	0.00597271	0.00921172	0.0093715	0.0139115	0.0195905	0.00356077	0.0079964	0.00720413	42.2718	23.2101	28.1232	6.77371	11.5614	9.54624	17.4675	30.0067	7.933	16.7948	16.0751
CL	0.408353	0.856025	0.702327	0.884382	0.859389	0.986133	0.7291	0.695172	0.577048	0.601044	0.560422	0.130805	0.150655	0.116742	0.0470487	0.106732	0.0477594	0.10912	0.198651	0.0514886	0.104281	0.0777496	32.0324	17.5993	16.6222	5.31995	12.4196	4.8431	14.9664	28.5758	8.92277	17.35	13.8734
SM(34:1:2)	0.0864781	0.0964299	0.0886919	0.0667585	0.0841428	0.0659174	0.100254	0.122255	0.0850879	0.0931403	0.0957967	0.00606525	0.00576375	0.00602511	0.01375	0.00732797	0.00402431	0.0115975	0.0131023	0.0118286	0.00470239	0.0100864	7.01363	5.97714	6.79331	20.5966	8.70898	6.10508	11.568	10.7172	13.9017	5.04872	10.5289
SM(36:2:2)	0.178048	0.191004	0.262961	0.59206	0.28211	0.232291	0.187142	0.317186	0.321659	0.287189	0.266962	0.00938349	0.0147487	0.0174943	0.105354	0.0065568	0.0767314	0.0217014	0.0292393	0.0718211	0.0158665	0.0188684	5.27021	7.72167	6.65284	17.7945	2.3242	33.0325	11.5962	9.21832	22.3283	5.52476	7.06783
SM(36:1:2)	3.51512	3.33472	3.53809	3.77152	3.90805	2.55781	3.73656	4.00886	4.40064	4.40532	4.16397	0.15845	0.113857	0.172975	0.248947	0.073433	0.0750533	0.145879	0.17125	0.149071	0.332256	0.158399	4.50767	3.41428	4.88894	6.60072	1.87902	2.93428	3.90409	4.27179	3.38749	7.54215	3.80404
SM(40:1:2)	0	0	0	0.00849256	0.00441782	0.026037	0.00831111	0.0220119	0.00390884	0.00513296	0.0107313	0	0	0	0.00283799	0.00765189	0.00198487	0.00799514	0.00179078	0.00459195	0.00621644	0.00464151				33.4174	173.205	7.62328	96.1983	8.13552	117.476	121.108	43.2519
SM(42:2:2)	0.0486144	0.0546008	0.0475595	0.0310924	0.0185466	0.236856	0.0371004	0.116149	0.0141432	0.0230526	0.0510541	0.00837176	0.0168684	0.00415195	0.00708831	0.00496047	0.032747	0.00305018	0.0117572	0.00505098	0.0135823	0.0217317	17.2207	30.8941	8.73001	22.7975	26.746	13.8257	8.2214	10.1226	35.7132	58.9189	42.5661
SM(42:1:2)	0	0.0717003	0.0328637	0.0470644	0.0744617	0.0437613	0.0165554	0.0209568	0.0117927	0.00457337	0.00612699	0	0.0262235	0.0252019	0.0115527	0.0309927	0.0160066	0.0161805	0.00686454	0.00831327	0.00325253	0.00581989		36.5738	76.686	24.5465	41.6224	36.5771	97.7355	32.7557	70.4949	71.1189	94.9878
SM	3.82826	3.74846	3.97017	4.51698	4.37173	3.16267	4.08593	4.60742	4.83724	4.81841	4.59464	0.165093	0.115489	0.192694	0.324813	0.0622249	0.116722	0.131696	0.18944	0.138174	0.331312	0.178289	4.31248	3.08097	4.85354	7.19093	1.42335	3.6906	3.22316	4.11164	2.85647	6.87596	3.88036
Cer(36:2:2)	0	0.0118029	0.0217962	0.0236844	0.0246894	0.014178	0.0155355	0.0220459	0.0236857	0.0221766	0.0210875	0	0.0020738	0.0035289	0.00345871	0.00103222	0.000793638	0.00168734	0.00481931	0.00163132	0.0014533	0.00226825		17.5703	16.1904	14.6033	4.18082	5.59768	10.8612	21.8604	6.88737	6.55327	10.7564
Cer(36:1:2)	0.134094	0.142882	0.151528	0.154667	0.166299	0.128927	0.136895	0.134712	0.147106	0.146772	0.145334	0.00528384	0.0158054	0.0139351	0.0138302	0.0106122	0.00196302	0.00665796	0.00872361	0.00796946	0.016154	0.00438069	3.94039	11.0618	9.19637	8.94188	6.38137	1.52258	4.86355	6.47575	5.4175	11.0062	3.01421
Cer	0.134094	0.154685	0.173324	0.178352	0.190988	0.143105	0.152431	0.156758	0.170792	0.168948	0.166422	0.00528384	0.0178501	0.0173889	0.0172439	0.0115324	0.00264448	0.00830808	0.0127151	0.00897484	0.0175476	0.0059559	3.94039	11.5397	10.0326	9.66847	6.03826	1.84793	5.4504	8.1113	5.25485	10.3864	3.5788
HexCer(36:1:2)	0.0072556	0.0345662	0.0241724	0.0273768	0.0334169	0.0742999	0.0142705	0.0519978	0.00481031	0.00857349	0.0226638	0.0125671	0.0114411	0.00792113	0.00185776	0.00717767	0.00585835	0.00371888	0.00997158	0.00356583	0.00642355	0.00587728	173.205	33.099	32.7693	6.78589	21.4791	7.88474	26.0599	19.1769	74.1289	74.9234	25.9324
HexCer(42:2:2)	0.0658329	0.0984425	0.054681	0.0525738	0.0732557	0.37091	0.0472198	0.30952	0.00727932	0.0308927	0.0788227	0.0232938	0.00344189	0.00596409	0.0022646	0.0335603	0.0369807	0.0135466	0.0521948	0.00704309	0.021553	0.0372376	35.3832	3.49634	10.9071	4.30747	45.8125	9.97027	28.6885	16.8631	96.7548	69.7675	47.2423
HexCer(42:1:2)	0	0.019491	0	0.00801864	0.0140349	0.097366	0.0149727	0.0887032	0	0	0.0218817	0	0.00652029	0	0.00144085	0.00997102	0.0106963	0.00401647	0.0200373	0	0	0.00850957		33.4528		17.9687	71.0442	10.9856	26.8252	22.5891			38.889
HexCer	0.0730885	0.1525	0.0788535	0.0879693	0.120708	0.542576	0.0764631	0.450221	0.0120896	0.0394661	0.123368	0.0193111	0.0144646	0.012744	0.00346	0.0495727	0.0520452	0.0190246	0.0734216	0.0104448	0.0267172	0.0478794	26.4216	9.48501	16.1616	3.93319	41.0684	9.59225	24.8808	16.3079	86.3945	67.6966	38.8102
Sulf(36:1:2)	0.0255821	0.0287226	0.0123135	0.0110682	0.0124889	0.0491682	0.0139452	0.0457051	0.00538737	0.00889701	0.017894	0.00486227	0.00717845	0.0043768	0.000461948	0.00267817	0.00492091	0.00109764	0.00658429	0.00104754	0.00261226	0.00605541	19.0065	24.9924	35.5447	4.17364	21.4443	10.0083	7.87111	14.406	19.4445	29.361	33.8405
Sulf(40:1:3)	0.0234228	0.03604	0.0172118	0.0197971	0.0223993	0.0906274	0.013014	0.0672349	0.00388922	0.00903287	0.0265954	0.00211492	0.00307483	0.00264317	0.00272359	0.00497774	0.00823074	0.0047393	0.0156521	0.00185832	0.00365003	0.00977238	9.02933	8.53172	15.3567	13.7575	22.2228	9.08196	36.4169	23.2797	47.7814	40.4083	36.7447
Sulf(42:2:2)	0.0435806	0.0659479	0.0415701	0.0385034	0.0521009	0.249045	0.0298507	0.175596	0.00991643	0.0202838	0.0560099	0.00481495	0.00854959	0.00488082	0.00281285	0.0158894	0.0237713	0.0112221	0.0129003	0.00299726	0.00740831	0.0197574	11.0484	12.9642	11.7412	7.30548	30.4974	9.54496	37.594	7.3466	30.2252	36.5233	35.2749
Sulf(42:1:2)	0.0086724	0.00908655	0.00177007	0.000178546	0.00095633	0.0175135	0.00477019	0.0173401	0	0.00118788	0.00367277	0.00171444	0.00231299	0.00168079	0.000309251	0.00165641	0.00223156	0.0012985	0.00619072	0	0.00148543	0.00208919	19.7689	25.455	94.9562	173.205	173.205	12.742	27.2212	35.7018		125.049	56.8832
Sulf(41:1:3)	0.00155526	0.00938078	0.00282666	0.00695143	0.00829487	0.029405	0.00238701	0.0161282	0	0.00144033	0.00810007	0.00269379	0.0028007	0.00343763	0.00060744	0.00321549	0.00390895	0.00225304	0.00545538	0	0.00199869	0.00321483	173.205	29.8557	121.615	8.73834	38.7648	13.2935	94.3873	33.825		138.766	39.689
Sulf	0.102813	0.149178	0.0756921	0.0764987	0.0962403	0.435759	0.0639671	0.322004	0.019193	0.0408419	0.112272	0.00657338	0.0213468	0.00942146	0.00372682	0.0272346	0.0383564	0.0199932	0.0446652	0.00546822	0.016454	0.0361307	6.39352	14.3096	12.4471	4.87174	28.2985	8.8022	31.2554	13.871	28.4907	40.2871	32.1814
GM3(36:1:2)	0.148917	0.159674	0.0965309	0.103855	0.108754	0.0345413	0.134647	0.0984734	0.07707	0.0923787	0.0687863	0.0248975	0.0146351	0.00608091	0.0126853	0.0048798	0.0175057	0.0133145	0.0238063	0.0144705	0.00680177	0.0118302	16.7191	9.16559	6.29945	12.2144	4.48701	50.6806	9.88845	24.1754	18.7757	7.36292	17.1985
GM3	0.148917	0.159674	0.0965309	0.103855	0.108754	0.0345413	0.134647	0.0984734	0.07707	0.0923787	0.0687863	0.0248975	0.0146351	0.00608091	0.0126853	0.0048798	0.0175057	0.0133145	0.0238063	0.0144705	0.00680177	0.0118302	16.7191	9.16559	6.29945	12.2144	4.48701	50.6806	9.88845	24.1754	18.7757	7.36292	17.1985
GD3(36:1:2)	0	0.0597495	0.0543153	0.0725231	0.0868941	0.107917	0.0156063	0	0.0377486	0.0224952	0.05157	0	0.00769525	0.00639717	0.00834864	0.0181124	0.0286801	0.00521253	0	0.0102891	0.00237304	0.0132333		12.8792	11.7778	11.5117	20.8442	26.5761	33.4001		27.2569	10.5491	25.6609
GD3	0	0.0597495	0.0543153	0.0725231	0.0868941	0.107917	0.0156063	0	0.0377486	0.0224952	0.05157	0	0.00769525	0.00639717	0.00834864	0.0181124	0.0286801	0.00521253	0	0.0102891	0.00237304	0.0132333		12.8792	11.7778	11.5117	20.8442	26.5761	33.4001		27.2569	10.5491	25.6609
GD1(36:1:2)	6.10214	4.52498	3.99968	4.50985	4.54698	3.5224	3.48008	7.20883	8.59938	7.33849	6.84106	0.839805	0.431172	0.818316	0.607415	0.331654	0.30012	1.04088	1.00338	1.40926	1.14527	2.21385	13.7625	9.52869	20.4595	13.4686	7.29394	8.52032	29.9097	13.9188	16.388	15.6064	32.3612
GD1(38:1:2)	0.415371	0.30452	0.434802	0.548711	0.542266	0.487141	0.857741	1.55103	0.855664	0.818116	0.744917	0.167923	0.048679	0.1118	0.0829574	0.0509358	0.0365128	0.321805	0.133023	0.17566	0.21527	0.237988	40.4273	15.9855	25.7128	15.1186	9.39315	7.49533	37.5178	8.57647	20.5291	26.3128	31.9483
OAcGD1(36:1:2)	0.258812	0.248511	0.175913	0.219119	0.24729	0.206785	0.226269	0.144059	0.322896	0.305243	0.272445	0.0863484	0.0395884	0.0420085	0.0191757	0.0222709	0.03325	0.0113217	0.0131072	0.0652287	0.10782	0.0843804	33.3633	15.9302	23.8802	8.75125	9.00599	16.0795	5.00364	9.09851	20.2011	35.3227	30.9716
OAcGD1(38:1:2)	0.220457	0.12662	0.174354	0.0177811	0.0282237	0.0906915	0.130225	0.106497	0.0861712	0.100983	0.105759	0.0159636	0.023405	0.0570498	0.0155953	0.0258793	0.0274896	0.0311923	0.0534233	0.0251032	0.054406	0.0387589	7.24116	18.4844	32.7206	87.7076	91.6934	30.3111	23.9527	50.1642	29.1318	53.8766	36.6481
GD1	6.99678	5.20464	4.78475	5.29547	5.36476	4.30702	4.69431	9.01042	9.86411	8.56283	7.96418	1.0755	0.539587	0.982649	0.715182	0.390506	0.329862	1.30585	1.02789	1.61798	1.45904	2.54062	15.3714	10.3674	20.5371	13.5056	7.27909	7.6587	27.8177	11.4078	16.4027	17.0392	31.9006
GT1(36:1:2)	3.05272	2.63914	3.4374	3.8483	4.0558	2.37485	1.24754	5.2698	6.97437	5.41381	4.59688	0.793989	0.599179	0.909962	1.35969	0.303301	0.171781	0.205778	0.983103	1.53032	1.00837	1.85046	26.0092	22.7036	26.4724	35.3322	7.4782	7.23335	16.4947	18.6554	21.9421	18.6259	40.2546
GT1(38:1:2)	0.00713245	0.234697	0.347787	0.479889	0.484172	0.407845	0.458513	0.845324	0.569398	0.490534	0.459751	0.00627144	0.0785155	0.114852	0.194749	0.0376516	0.0499904	0.112671	0.0916523	0.146755	0.110674	0.181463	87.9282	33.454	33.0237	40.5821	7.77649	12.2572	24.5732	10.8423	25.7737	22.5619	39.4698
OAcGT1(36:1:2)	0.701767	0.888614	0.821096	1.06903	1.17461	0.865031	0.634495	0.981739	1.44443	1.28557	1.28039	0.166266	0.224054	0.23405	0.237835	0.025362	0.100589	0.294418	0.13708	0.319957	0.385132	0.457416	23.6925	25.2139	28.5046	22.2477	2.15919	11.6283	46.4019	13.963	22.1511	29.958	35.7247
GT1	3.76162	3.76245	4.60629	5.39722	5.71458	3.64772	2.34055	7.09686	8.9882	7.18992	6.33703	0.954893	0.837931	1.24997	1.78822	0.352526	0.281391	0.535444	1.18982	1.99041	1.49811	2.48512	25.3852	22.2709	27.1362	33.1323	6.16889	7.71416	22.8769	16.7655	22.1447	20.8362	39.2159
GQ1(36:1:2)	0	0.0208478	0.103884	0.134335	0.143819	0.0403079	0.0149511	0.181958	0.266101	0.185621	0.153824	0	0.0361095	0.0784559	0.0599971	0.0396244	0.0079478	0.025896	0.0832869	0.124097	0.0343259	0.0784648		173.205	75.5225	44.6624	27.5516	19.7177	173.205	45.7725	46.6355	18.4925	51.0094
OAcGQ1(36:1:2)	0	0.030213	0.115358	0.175651	0.21425	0.0969113	0.0335324	0.168305	0.269111	0.202458	0.174198	0	0.0523304	0.0924742	0.0403754	0.0332114	0.00422472	0.0444742	0.0627627	0.0904769	0.085706	0.0814225		173.205	80.1631	22.9862	15.5012	4.35936	132.631	37.2911	33.6207	42.3327	46.7415
GQ1	0	0.0510608	0.219242	0.309985	0.358069	0.137219	0.0484835	0.350263	0.535212	0.388079	0.328022	0	0.0884399	0.170719	0.100364	0.0702574	0.0108335	0.0700816	0.145678	0.213453	0.119305	0.159494		173.205	77.8678	32.3769	19.6212	7.895	144.547	41.5911	39.8819	30.7424	48.6231
Class
LPC	0.408635	0.519018	0.441775	0.471576	0.435327	0.513322	0.330198	0.333219	0.427647	0.353044	0.371171	0.03368	0.131743	0.0212529	0.0437815	0.0370495	0.0468157	0.0476346	0.0540885	0.0625038	0.0356823	0.0575077	8.24209	25.3831	4.8108	9.28407	8.51072	9.12014	14.4261	16.2321	14.6157	10.107	15.4936
PC	45.8045	47.5616	46.5021	45.9257	47.4485	45.092	43.0168	40.9444	40.7176	40.7628	41.0751	0.625517	0.462095	0.827782	0.55052	1.30359	0.670356	1.86824	2.64584	0.471429	0.779905	0.250332	1.36562	0.971572	1.7801	1.19872	2.74738	1.48664	4.34304	6.46201	1.1578	1.91328	0.60945
PC-O*	0.364099	0.341391	0.365976	0.361657	0.377496	0.341575	0.347484	0.397667	0.371271	0.380392	0.407382	0.0060203	0.0129468	0.0160569	0.00759119	0.0191085	0.012764	0.0223923	0.0472753	0.00778248	0.0157175	0.026792	1.65348	3.79236	4.38741	2.099	5.06189	3.7368	6.44412	11.8882	2.09617	4.13192	6.57663
LPE	0.551463	0.606835	0.687439	0.595952	0.612129	0.575859	0.736781	0.532072	0.701715	0.646113	0.617098	0.0858958	0.0387609	0.124845	0.00797787	0.14268	0.129855	0.16354	0.061264	0.105928	0.13416	0.0852751	15.576	6.38739	18.1608	1.33868	23.3088	22.5498	22.1966	11.5142	15.0956	20.7642	13.8187
PE	14.7126	14.3409	15.4397	15.8727	15.7585	16.4473	18.4045	17.4117	17.5577	17.382	17.1353	0.226872	0.17333	0.323315	0.156268	0.676804	0.555219	1.04025	0.67732	0.224262	0.417369	0.360088	1.54202	1.20864	2.09405	0.984506	4.29484	3.37576	5.65214	3.89003	1.27729	2.40116	2.10144
PE-P*	11.7619	11.5427	10.8724	11.4199	10.7939	11.9445	13.2841	14.5663	13.8719	13.7445	13.9987	0.130464	0.27891	0.367256	0.227746	0.54584	0.110383	0.585486	1.25412	0.334926	0.563485	0.344235	1.10921	2.41633	3.37789	1.99429	5.05694	0.924129	4.40742	8.60976	2.41442	4.0997	2.45906
LPI	0.262787	0.325545	0.244878	0.233012	0.248764	0.237486	0.137488	0.114591	0.185466	0.161699	0.174391	0.0113625	0.0415655	0.0239177	0.02519	0.0275575	0.034304	0.0186426	0.0223189	0.0101768	0.0333434	0.0183989	4.32383	12.768	9.76718	10.8106	11.0778	14.4446	13.5595	19.477	5.48714	20.6206	10.5504
PI	7.76284	7.85188	7.48962	5.91157	6.25791	6.60038	3.8644	4.81877	4.53765	4.73737	4.77648	0.607023	0.372717	0.463149	0.675867	0.260557	0.174737	0.818673	0.722378	0.220065	0.0414395	0.274114	7.81959	4.74685	6.18388	11.433	4.16365	2.64738	21.185	14.9909	4.84976	0.874735	5.73883
LPS	0.0783772	0.0648885	0.0859118	0.0872962	0.0792368	0.0810703	0.109558	0.0417784	0.0751094	0.0614469	0.0670222	0.0167285	0.00676748	0.00722527	0.0059492	0.00415172	0.0102736	0.0140948	0.00428799	0.00603409	0.00851871	0.00786273	21.3435	10.4294	8.4101	6.81495	5.23964	12.6724	12.8651	10.2636	8.03373	13.8635	11.7315
PS	13.1823	11.0277	12.1942	12.719	11.682	11.9174	14.3396	13.7603	15.6365	15.7441	15.3119	0.833335	0.50167	0.484861	0.561991	0.0918066	0.159576	1.47599	3.41662	0.238873	0.43392	0.343251	6.32161	4.54916	3.97616	4.41852	0.785881	1.33901	10.2931	24.8295	1.52766	2.75608	2.24173
LPG	0.0112865	0.00980811	0.00982167	0.00602425	0.00595486	0.00666615	0.00238012	0.00634986	0.00179972	0.00298349	0.0034711	0.0037775	0.00163844	0.00430744	0.000974083	0.000471858	0.00138855	0.000483484	0.000975513	0.00073564	0.000885893	0.000957844	33.4691	16.7049	43.8565	16.1694	7.92391	20.8298	20.3135	15.3627	40.8752	29.6932	27.5948
PG/BMP*	0.257202	0.467801	0.459598	0.438337	0.433466	0.41643	0.159422	0.153975	0.119109	0.109743	0.0948013	0.0330548	0.0218683	0.0493678	0.0291666	0.0492964	0.0309335	0.0165993	0.0218514	0.0111961	0.0194678	0.0187302	12.8517	4.67469	10.7415	6.65392	11.3726	7.42827	10.4122	14.1915	9.39992	17.7394	19.7573
PA	0.146456	0.119367	0.10976	0.109209	0.119047	0.521193	0.0248198	0.588821	0.103156	0.152757	0.34125	0.075553	0.039187	0.0474144	0.0119605	0.0341671	0.0492416	0.0268998	0.103225	0.0198312	0.0477831	0.189323	51.5875	32.8291	43.1983	10.9519	28.7004	9.44786	108.381	17.5308	19.2245	31.2804	55.4793
CL	0.408353	0.856025	0.702327	0.884382	0.859389	0.986133	0.7291	0.695172	0.577048	0.601044	0.560422	0.130805	0.150655	0.116742	0.0470487	0.106732	0.0477594	0.10912	0.198651	0.0514886	0.104281	0.0777496	32.0324	17.5993	16.6222	5.31995	12.4196	4.8431	14.9664	28.5758	8.92277	17.35	13.8734
SM	3.82826	3.74846	3.97017	4.51698	4.37173	3.16267	4.08593	4.60742	4.83724	4.81841	4.59464	0.165093	0.115489	0.192694	0.324813	0.0622249	0.116722	0.131696	0.18944	0.138174	0.331312	0.178289	4.31248	3.08097	4.85354	7.19093	1.42335	3.6906	3.22316	4.11164	2.85647	6.87596	3.88036
Cer	0.134094	0.154685	0.173324	0.178352	0.190988	0.143105	0.152431	0.156758	0.170792	0.168948	0.166422	0.00528384	0.0178501	0.0173889	0.0172439	0.0115324	0.00264448	0.00830808	0.0127151	0.00897484	0.0175476	0.0059559	3.94039	11.5397	10.0326	9.66847	6.03826	1.84793	5.4504	8.1113	5.25485	10.3864	3.5788
HexCer	0.0730885	0.1525	0.0788535	0.0879693	0.120708	0.542576	0.0764631	0.450221	0.0120896	0.0394661	0.123368	0.0193111	0.0144646	0.012744	0.00346	0.0495727	0.0520452	0.0190246	0.0734216	0.0104448	0.0267172	0.0478794	26.4216	9.48501	16.1616	3.93319	41.0684	9.59225	24.8808	16.3079	86.3945	67.6966	38.8102
Sulf	0.102813	0.149178	0.0756921	0.0764987	0.0962403	0.435759	0.0639671	0.322004	0.019193	0.0408419	0.112272	0.00657338	0.0213468	0.00942146	0.00372682	0.0272346	0.0383564	0.0199932	0.0446652	0.00546822	0.016454	0.0361307	6.39352	14.3096	12.4471	4.87174	28.2985	8.8022	31.2554	13.871	28.4907	40.2871	32.1814
GM3	0.148917	0.159674	0.0965309	0.103855	0.108754	0.0345413	0.134647	0.0984734	0.07707	0.0923787	0.0687863	0.0248975	0.0146351	0.00608091	0.0126853	0.0048798	0.0175057	0.0133145	0.0238063	0.0144705	0.00680177	0.0118302	16.7191	9.16559	6.29945	12.2144	4.48701	50.6806	9.88845	24.1754	18.7757	7.36292	17.1985
GD3	0	0.0597495	0.0543153	0.0725231	0.0868941	0.107917	0.0156063	0	0.0377486	0.0224952	0.05157	0	0.00769525	0.00639717	0.00834864	0.0181124	0.0286801	0.00521253	0	0.0102891	0.00237304	0.0132333		12.8792	11.7778	11.5117	20.8442	26.5761	33.4001		27.2569	10.5491	25.6609
GD1	6.99678	5.20464	4.78475	5.29547	5.36476	4.30702	4.69431	9.01042	9.86411	8.56283	7.96418	1.0755	0.539587	0.982649	0.715182	0.390506	0.329862	1.30585	1.02789	1.61798	1.45904	2.54062	15.3714	10.3674	20.5371	13.5056	7.27909	7.6587	27.8177	11.4078	16.4027	17.0392	31.9006
GT1	3.76162	3.76245	4.60629	5.39722	5.71458	3.64772	2.34055	7.09686	8.9882	7.18992	6.33703	0.954893	0.837931	1.24997	1.78822	0.352526	0.281391	0.535444	1.18982	1.99041	1.49811	2.48512	25.3852	22.2709	27.1362	33.1323	6.16889	7.71416	22.8769	16.7655	22.1447	20.8362	39.2159
GQ1	0	0.0510608	0.219242	0.309985	0.358069	0.137219	0.0484835	0.350263	0.535212	0.388079	0.328022	0	0.0884399	0.170719	0.100364	0.0702574	0.0108335	0.0700816	0.145678	0.213453	0.119305	0.159494		173.205	77.8678	32.3769	19.6212	7.895	144.547	41.5911	39.8819	30.7424	48.6231
Membrane lipids	100	100	100	100	100	100	100	100	100	100	100	3.17764e-14	2.84217e-14	2.17074e-14	1.42109e-14	2.46139e-14	1.00486e-14	2.24693e-14	3.01458e-14	2.00972e-14	2.00972e-14	5.1238e-14	3.17764e-14	2.84217e-14	2.17074e-14	1.42109e-14	2.46139e-14	1.00486e-14	2.24693e-14	3.01458e-14	2.00972e-14	2.00972e-14	5.1238e-14
Data represent mean ± SD (n = 4). CV%, coefficient of variation, calculated as SD/Mean x 100; green fill indicates CV% < 30.
LMD, laser microdissection.
PC and PC-O, diacyl and alkyl-acyl phosphatidylcholine; PE and PE-P, diacyl and alkenyl-acyl phosphatidylethanolamine; PI, phosphatidylinositol; PS, phosphatidylserine; PG, phosphatidylglycerol; BMP, bis(monoacylglycero)phosphate; PA, phosphatidic acid; CL, cardiolipin; LPC, LPE, LPI, and LPS, the corresponding lysolipids;
SM, sphingomyelin; Cer, ceramide; HexCer, hexosylceramide; Sulf, sulfatide; GM3, GM3 monosialoganglioside; GD3, GD3 disialoganglioside; GD1, GD1 disialoganglioside; GT1, GT1 trisialoganglioside; GQ1, GQ1 tetrasialoganglioside.
Membrane lipids were calculated as the sum of glycerophospho- and sphingolipids, not including higher gangliosides GD3, GD1, GT1, and GQ1.
Sum formulas for glycero(phospho)lipids are defined as the lipid class abbreviation followed by the total number of carbons and total number of double bonds for all chains, e.g. PC(34:1).
Sum formulas for sphingolipids are defined as the lipid class abbreviation followed by the total number of carbons, total number of double bonds and total number of hydroxyl groups in the long chain base and the fatty acyl moiety, e.g. Cer(34:1:2).
* PC/PE-O(x:y), alkyl-acyl and PC/PE-P(x:y-1), alkenyl-acyl species as well as PG and BMP species are isomeric and therefore could not be resolved by the applied shotgun strategy.
For simplicity, for PC/PE, we indicated the more likely annotation based on literature data and our previous works, whereas for PG/BMP, PG or LPG was used in the species list.
